# Supplementary material for: Early childhood suspected developmental delay in 63 low- and middle-income countries: Large within- and between-country inequalities documented using national health surveys
Source: PubMed Central journal article supplement (PMC7295453; doi:10.7189/jogh.10.010427), 2020-06
Supplement: jogh-10-010427-s001.pdf [file jogh-10-010427-s001.pdf]

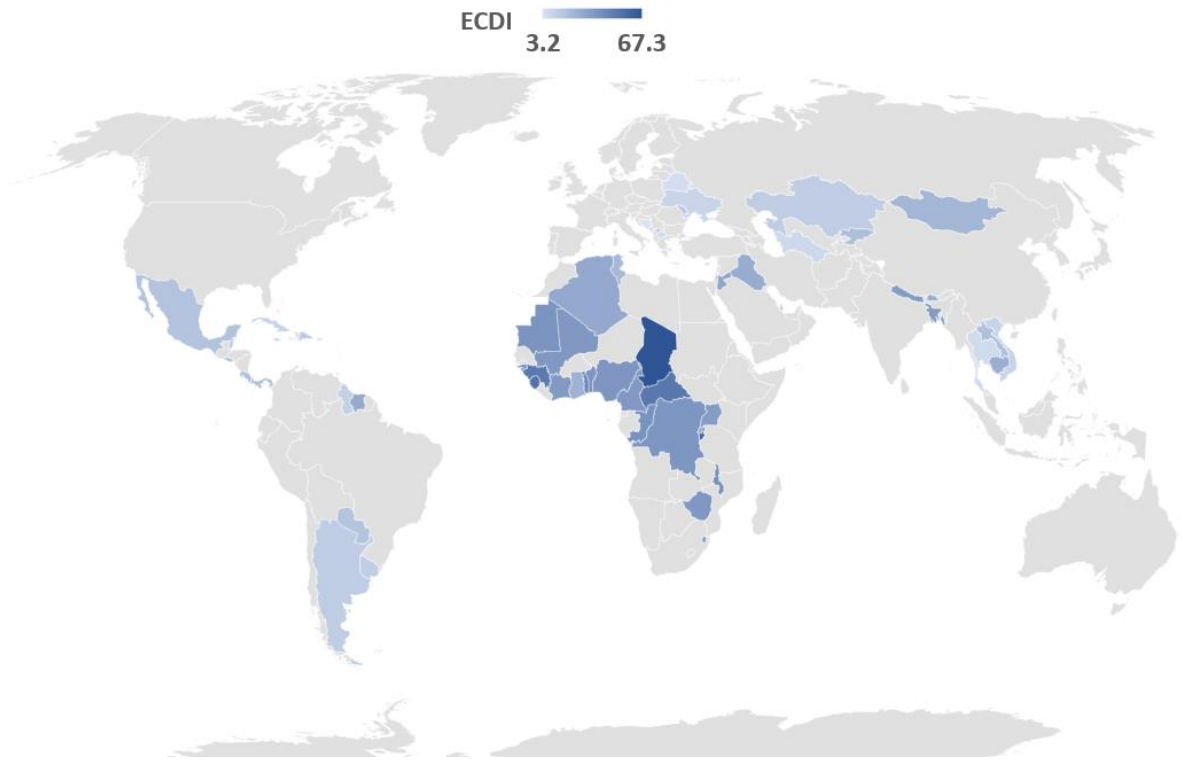

Fig S1. Prevalence of suspected developmental delay (ECDI) among children aged 36-49 months in 63 low and middle-income countries. Source: MICS and DHS surveys, 2010-2016.

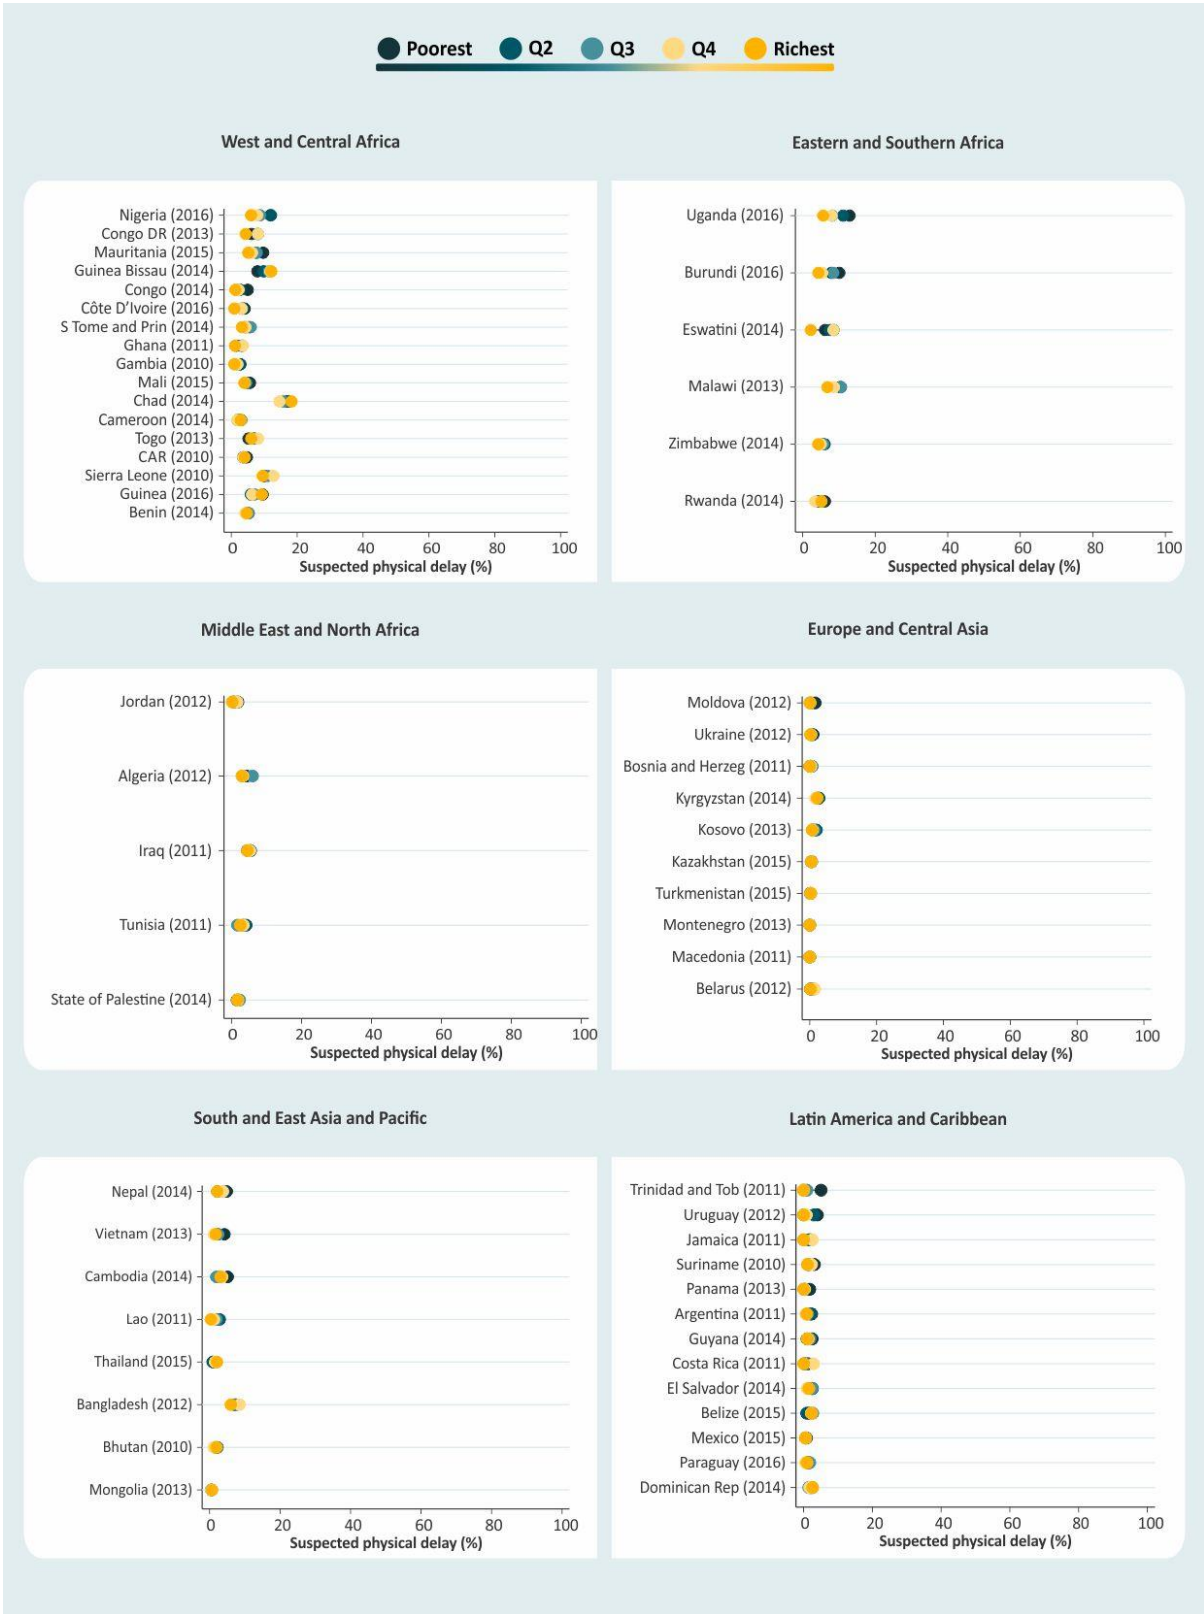

Fig S2. Prevalence of suspected developmental delay (physical domain) by wealth quintiles, countries grouped by world region. Source: MICS and DHS surveys, 2010-2016.

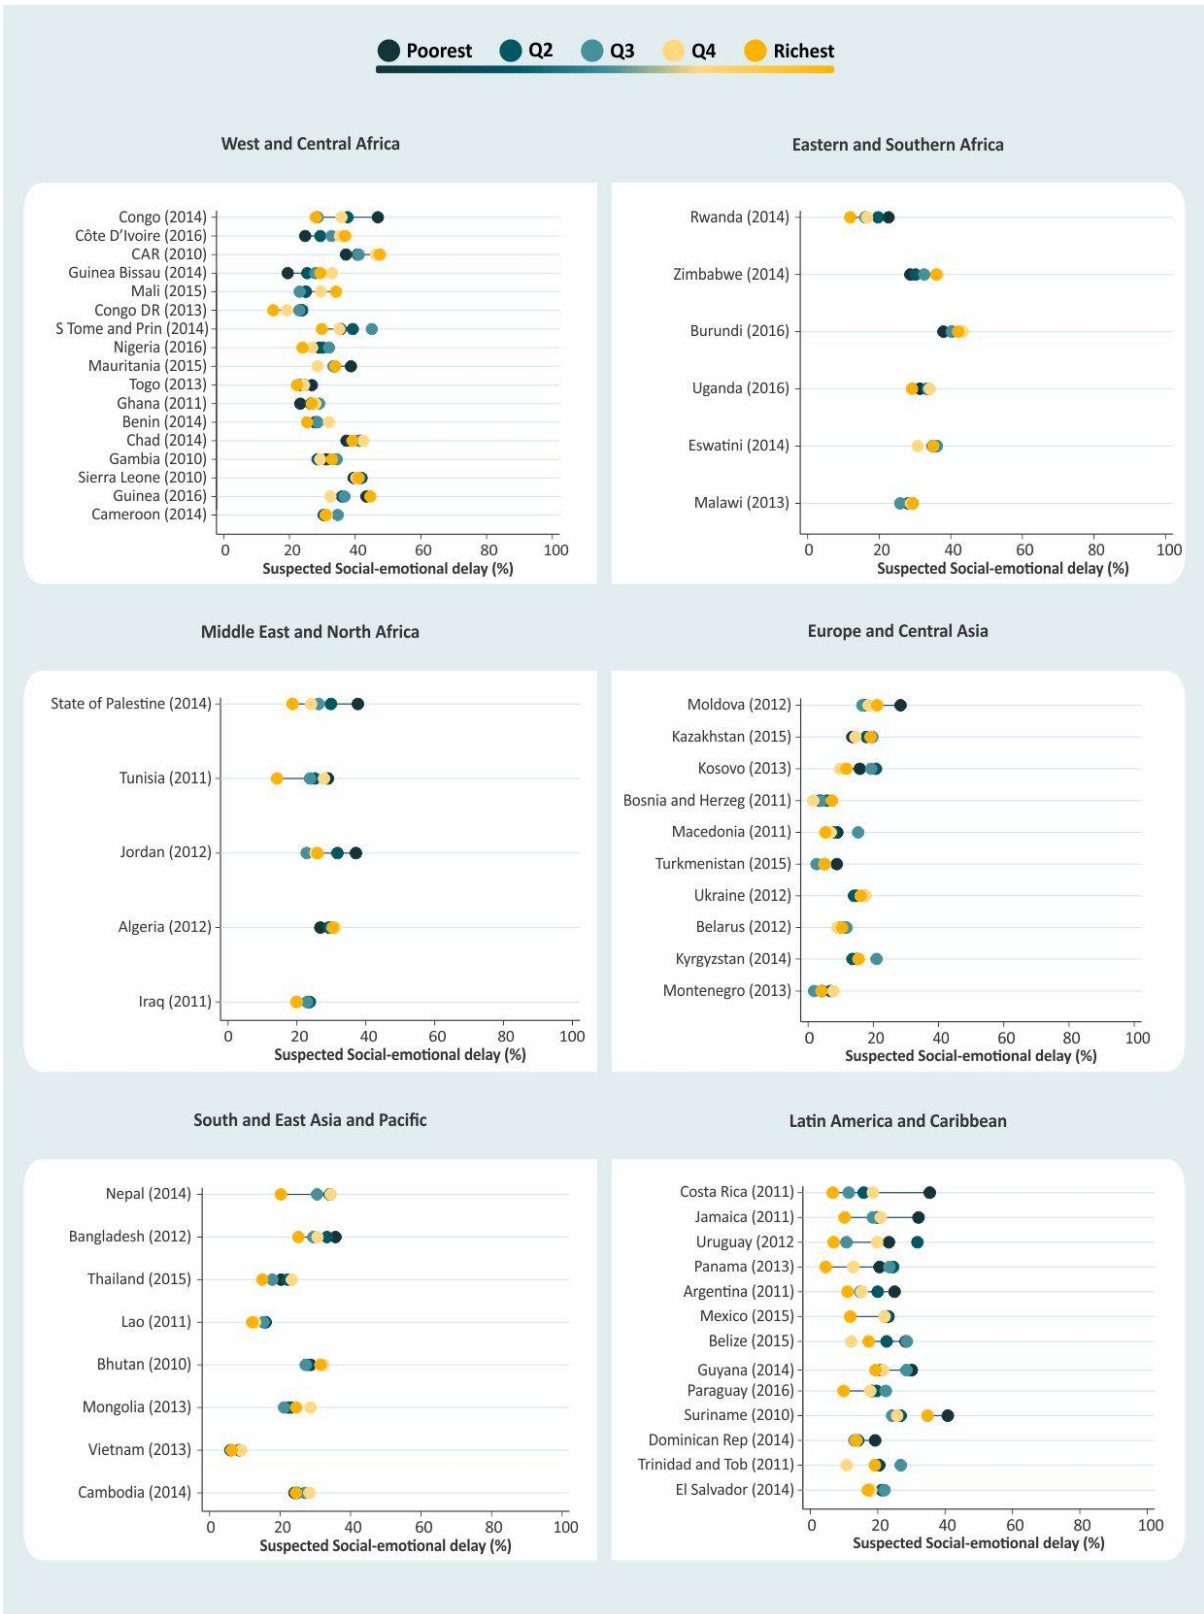

Fig S3. Prevalence of suspected developmental delay (social-emotional domain) by wealth quintiles, countries grouped by world region. Source: MICS and DHS surveys, 2010-2016.

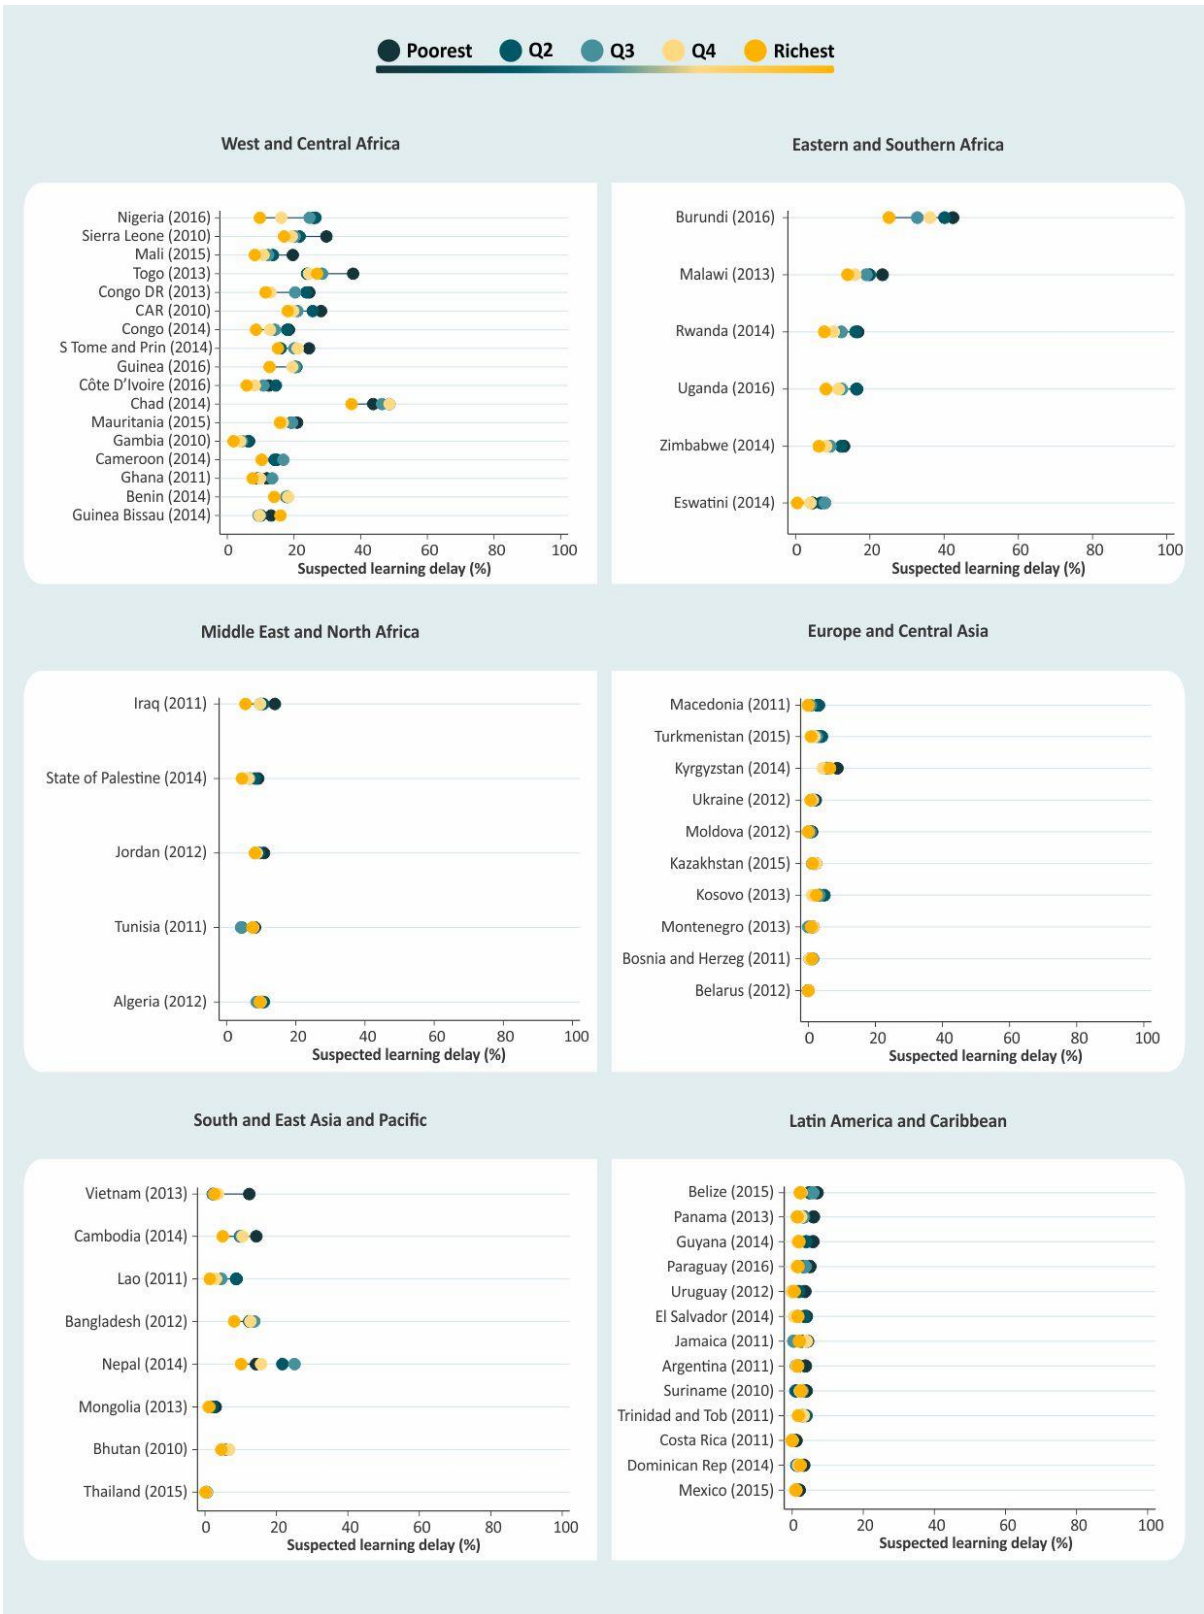

Fig S4. Prevalence of suspected developmental delay (learning domain) by wealth quintiles, countries grouped by world region. Source: MICS and DHS surveys, 2010–2016.

Table S1. Proportions of children with suspected developmental delay in each studied country for the combined indicator (ECDI), sample size and each of the domains; countries grouped by world region. Source: MICS and DHS surveys, 2010-2016.

| Country                           | Year | N     | Children with suspected developmental delay (%) |              |                  |              |          |              |                   |              |      | ECDI         | IC95% |
|-----------------------------------|------|-------|-------------------------------------------------|--------------|------------------|--------------|----------|--------------|-------------------|--------------|------|--------------|-------|
|                                   |      |       | Physical                                        | IC95%        | Social-emotional | IC95%        | Learning | IC95%        | Literacy-numeracy | IC95%        |      |              |       |
| <b>West &amp; Central Africa</b>  |      |       |                                                 |              |                  |              |          |              |                   |              |      |              |       |
| <b>Benin</b>                      | 2014 | 4882  | 4.9                                             | [3.7; 6.0]   | 28.5             | [26.5; 30.5] | 17.3     | [15.6; 18.9] | 92.4              | [91.2; 93.7] | 37.8 | [35.8; 39.8] |       |
| <b>Cameroon</b>                   | 2014 | 2833  | 2.4                                             | [1.5; 3.3]   | 31.6             | [29.5; 33.8] | 13.6     | [11.7; 15.5] | 83.9              | [81.5; 86.2] | 36.7 | [34.3; 39.0] |       |
| <b>CAR</b>                        | 2010 | 3820  | 3.9                                             | [3.0; 4.8]   | 42.4             | [39.4; 45.3] | 22.7     | [20.5; 24.9] | 92.7              | [91.1; 94.2] | 51.7 | [49.0; 54.4] |       |
| <b>Chad</b>                       | 2014 | 4098  | 16.5                                            | [14.8; 18.1] | 40.4             | [37.8; 43.0] | 45.4     | [42.5; 48.3] | 94.6              | [93.5; 95.6] | 67.3 | [64.7; 70.0] |       |
| <b>Congo Brazzaville</b>          | 2014 | 3715  | 2.8                                             | [2.0; 3.5]   | 36.1             | [33.3; 38.9] | 14.9     | [12.8; 16.9] | 86.3              | [84.3; 88.3] | 39.1 | [36.0; 42.1] |       |
| <b>Congo DR</b>                   | 2013 | 2807  | 7.0                                             | [5.6; 8.5]   | 21.2             | [18.0; 24.5] | 19.2     | [16.3; 22.0] | 89.2              | [87.1; 91.3] | 34.0 | [30.2; 37.8] |       |
| <b>Côte d'Ivoire</b>              | 2016 | 3722  | 3.2                                             | [2.2; 4.1]   | 31.0             | [28.5; 33.5] | 11.0     | [8.7; 13.2]  | 92.5              | [90.7; 94.3] | 36.2 | [33.4; 39.1] |       |
| <b>Gambia</b>                     | 2010 | 4036  | 2.1                                             | [1.4; 2.7]   | 31.3             | [28.7; 33.9] | 4.7      | [3.6; 5.8]   | 87.7              | [85.4; 89.9] | 30.4 | [27.8; 32.9] |       |
| <b>Ghana</b>                      | 2011 | 3002  | 2.6                                             | [1.8; 3.4]   | 26.6             | [24.0; 29.1] | 10.6     | [8.6; 12.5]  | 71.6              | [68.6; 74.6] | 24.9 | [22.1; 27.6] |       |
| <b>Guinea</b>                     | 2016 | 3146  | 7.5                                             | [6.1; 9.0]   | 38.5             | [36.1; 40.8] | 19.0     | [16.7; 21.4] | 94.2              | [92.8; 95.5] | 50.5 | [47.8; 53.3] |       |
| <b>Guinea Bissau</b>              | 2014 | 2955  | 10.5                                            | [8.1; 12.8]  | 26.5             | [23.8; 29.3] | 11.5     | [9.8; 13.1]  | 92.4              | [90.6; 94.3] | 37.7 | [34.5; 41.0] |       |
| <b>Mali</b>                       | 2015 | 6548  | 4.6                                             | [3.8; 5.4]   | 27.1             | [25.4; 28.9] | 13.1     | [11.6; 14.5] | 91.4              | [90.2; 92.7] | 37.1 | [35.0; 39.1] |       |
| <b>Mauritania</b>                 | 2015 | 4512  | 7.5                                             | [6.2; 8.7]   | 33.9             | [31.4; 36.4] | 18.6     | [16.4; 20.8] | 72.5              | [70.2; 74.9] | 38.4 | [36.1; 40.8] |       |
| <b>Nigeria</b>                    | 2016 | 11673 | 9.5                                             | [8.7; 10.4]  | 28.6             | [27.2; 30.0] | 21.2     | [19.7; 22.6] | 70.3              | [68.4; 72.2] | 37.9 | [36.1; 39.6] |       |
| <b>São Tome e Príncipe</b>        | 2014 | 863   | 4.7                                             | [2.7; 6.8]   | 37.5             | [33.6; 41.4] | 19.7     | [16.4; 23.1] | 84.3              | [80.9; 87.8] | 45.0 | [40.6; 49.4] |       |
| <b>Sierra Leone</b>               | 2010 | 3636  | 10.7                                            | [9.2; 12.2]  | 40.8             | [37.9; 43.7] | 22.2     | [20.2; 24.3] | 90.5              | [89.1; 92.0] | 54.0 | [51.2; 56.8] |       |
| <b>Togo</b>                       | 2013 | 2200  | 6.6                                             | [5.1; 8.2]   | 24.3             | [22.0; 26.7] | 28.6     | [25.7; 31.4] | 92.3              | [90.6; 93.9] | 45.2 | [42.1; 48.2] |       |
| <b>Eastern &amp; South Africa</b> |      |       |                                                 |              |                  |              |          |              |                   |              |      |              |       |
| <b>Burundi</b>                    | 2016 | 4707  | 7.4                                             | [6.5; 8.4]   | 40.6             | [38.3; 42.9] | 35.9     | [33.7; 38.1] | 91.3              | [90.2; 92.4] | 59.2 | [57.2; 61.3] |       |
| <b>Eswatini</b>                   | 2014 | 1055  | 6.7                                             | [4.9; 8.4]   | 34.8             | [31.1; 38.4] | 4.9      | [3.1; 6.8]   | 82.7              | [79.8; 85.5] | 33.6 | [30.2; 37.1] |       |
| <b>Malawi</b>                     | 2013 | 7763  | 9.5                                             | [8.4; 10.7]  | 28.2             | [26.6; 29.8] | 18.8     | [17.3; 20.3] | 82.8              | [81.3; 84.2] | 39.1 | [37.4; 40.9] |       |
| <b>Rwanda</b>                     | 2014 | 2673  | 4.9                                             | [3.9; 5.9]   | 17.9             | [15.5; 20.3] | 13.2     | [11.5; 14.8] | 92.9              | [91.6; 94.1] | 28.4 | [25.9; 30.8] |       |
| <b>Uganda</b>                     | 2016 | 4770  | 9.4                                             | [8.1; 10.7]  | 32.3             | [30.5; 34.2] | 13.3     | [11.8; 14.8] | 71.0              | [68.9; 73.1] | 34.8 | [32.7; 36.8] |       |

|                                       |      |       |     |            |      |              |      |              |      |              |      |              |
|---------------------------------------|------|-------|-----|------------|------|--------------|------|--------------|------|--------------|------|--------------|
| <b>Zimbabwe</b>                       | 2014 | 4024  | 5.4 | [4.4; 6.4] | 32.4 | [30.5; 34.3] | 10.2 | [8.8; 11.5]  | 91.4 | [90.4; 92.5] | 36.8 | [35.0; 38.7] |
| <b>Middle East &amp; North Africa</b> |      |       |     |            |      |              |      |              |      |              |      |              |
| <b>Algeria</b>                        | 2012 | 5403  | 4.1 | [3.3; 4.9] | 29.5 | [27.6; 31.4] | 9.8  | [8.6; 10.9]  | 71.2 | [69.0; 73.4] | 29.2 | [27.4; 31.0] |
| <b>Iraq</b>                           | 2011 | 13669 | 5.1 | [4.4; 5.7] | 22.3 | [21.0; 23.5] | 10.4 | [9.4; 11.3]  | 82.0 | [80.5; 83.6] | 27.7 | [26.3; 29.1] |
| <b>Jordan</b>                         | 2012 | 3670  | 1.1 | [0.5; 1.6] | 29.0 | [25.6; 32.3] | 9.2  | [7.6; 10.8]  | 83.6 | [80.9; 86.2] | 30.4 | [27.2; 33.6] |
| <b>Qatar</b>                          | 2012 | 820   | 6.1 | [3.7; 8.5] | 23.7 | [19.4; 28.0] | 11.1 | [7.6; 14.6]  | 33.3 | [27.2; 39.4] | 13.4 | [9.4; 14.4]  |
| <b>State of Palestine</b>             | 2014 | 3274  | 1.9 | [0.9; 2.8] | 28.2 | [26.4; 30.0] | 7.1  | [6.0; 8.3]   | 81.2 | [79.4; 82.9] | 26.5 | [24.8; 28.1] |
| <b>Tunisia</b>                        | 2011 | 1152  | 3.1 | [1.9; 4.3] | 24.3 | [21.3; 27.4] | 6.3  | [4.6; 8.1]   | 67.5 | [63.6; 71.5] | 22.1 | [19.0; 25.1] |
| <b>Europe &amp; Central Asia</b>      |      |       |     |            |      |              |      |              |      |              |      |              |
| <b>Belarus</b>                        | 2012 | 1349  | 0.6 | [0.1; 1.1] | 10.3 | [8.2; 12.3]  | 0.0  | [0.0; 0.0]   | 52.2 | [48.3; 56.1] | 5.4  | [3.9; 7.0]   |
| <b>Bosnia and Herzegovina</b>         | 2011 | 917   | 0.3 | [0.0; 0.6] | 4.6  | [2.4; 6.7]   | 0.9  | [0.3; 1.5]   | 74.5 | [70.2; 78.9] | 3.3  | [1.5; 5.1]   |
| <b>Kazakhstan</b>                     | 2015 | 2322  | 0.5 | [0.0; 1.1] | 17.0 | [14.4; 19.5] | 1.8  | [0.9; 2.7]   | 72.8 | [69.9; 75.7] | 13.1 | [10.5; 15.6] |
| <b>Kosovo</b>                         | 2013 | 674   | 1.1 | [0.0; 2.7] | 15.5 | [12.5; 18.5] | 3.0  | [1.2; 4.9]   | 82.6 | [78.7; 86.5] | 15.8 | [13.0; 18.7] |
| <b>Kyrgyzstan</b>                     | 2014 | 1770  | 2.3 | [1.1; 3.4] | 16.1 | [14.0; 18.2] | 6.2  | [4.1; 8.2]   | 86.1 | [83.7; 88.5] | 19.7 | [17.1; 22.3] |
| <b>Macedonia</b>                      | 2011 | 561   | 0.0 | [0.0; 0.1] | 8.8  | [6.0; 11.5]  | 1.4  | [0.4; 2.5]   | 57.1 | [51.9; 62.4] | 6.9  | [4.4; 9.5]   |
| <b>Moldova</b>                        | 2012 | 712   | 0.4 | [0.0; 1.1] | 20.4 | [16.9; 23.9] | 0.3  | [0.0; 1.0]   | 70.7 | [66.9; 74.6] | 15.0 | [11.9; 18.2] |
| <b>Montenegro</b>                     | 2013 | 659   | 0.0 | [0.0; 0.0] | 5.1  | [2.7; 7.4]   | 1.0  | [0.0; 2.4]   | 78.8 | [73.9; 83.7] | 4.4  | [2.3; 6.5]   |
| <b>Turkmenistan</b>                   | 2015 | 1517  | 0.3 | [0.0; 0.9] | 5.4  | [3.9; 6.8]   | 2.6  | [1.0; 4.3]   | 82.7 | [79.5; 85.9] | 7.7  | [6.0; 9.4]   |
| <b>Ukraine</b>                        | 2012 | 1928  | 0.5 | [0.0; 1.1] | 16.0 | [13.3; 18.7] | 1.3  | [0.6; 2.0]   | 54.3 | [49.7; 58.9] | 9.3  | [7.3; 11.3]  |
| <b>South Asia</b>                     |      |       |     |            |      |              |      |              |      |              |      |              |
| <b>Bangladesh</b>                     | 2012 | 8638  | 7.3 | [6.3; 8.2] | 31.3 | [30.0; 32.7] | 12.0 | [11.0; 13.1] | 79.6 | [78.2; 80.9] | 35.4 | [33.9; 36.8] |
| <b>Bhutan</b>                         | 2010 | 2497  | 1.8 | [1.1; 2.5] | 29.6 | [27.1; 32.2] | 6.1  | [4.7; 7.4]   | 75.0 | [72.2; 77.8] | 27.4 | [24.7; 30]   |
| <b>Nepal</b>                          | 2014 | 2284  | 3.5 | [2.5; 4.6] | 31.4 | [28.7; 34.0] | 17.8 | [14.6; 21.1] | 71.7 | [68.0; 75.4] | 35.1 | [31.4; 38.8] |
| <b>East Asia &amp; Pacific</b>        |      |       |     |            |      |              |      |              |      |              |      |              |
| <b>Cambodia</b>                       | 2014 | 2621  | 3.5 | [2.5; 4.4] | 25.6 | [23.4; 27.8] | 10.2 | [8.7; 11.7]  | 72.9 | [70.1; 75.7] | 26.6 | [24.3; 29.0] |
| <b>Lao</b>                            | 2011 | 4425  | 1.8 | [1.3; 2.3] | 14.7 | [13.3; 16.2] | 6.1  | [4.8; 7.3]   | 80.1 | [78.1; 82.2] | 18.4 | [16.8; 20.1] |
| <b>Mongolia</b>                       | 2013 | 2337  | 0.6 | [0.0; 1.1] | 23.8 | [21.8; 25.8] | 1.7  | [1.0; 2.4]   | 91.5 | [90.1; 92.9] | 23.2 | [21.2; 25.1] |
| <b>Thailand</b>                       | 2015 | 5078  | 1.5 | [0.1; 2.8] | 20.0 | [17.4; 22.6] | 0.4  | [0.0; 0.9]   | 28.0 | [25.1; 31.0] | 6.7  | [5.3; 8.2]   |

|                                        |      |      |     |            |      |              |     |            |      |              |      |              |
|----------------------------------------|------|------|-----|------------|------|--------------|-----|------------|------|--------------|------|--------------|
| <b>Vietnam</b>                         | 2013 | 1197 | 2.4 | [1.1; 3.8] | 7.6  | [5.5; 9.8]   | 4.8 | [3.1; 6.4] | 71.9 | [68.5; 75.4] | 10.0 | [7.8; 12.2]  |
| <b>Latin America and the Caribbean</b> |      |      |     |            |      |              |     |            |      |              |      |              |
| <b>Argentina</b>                       | 2011 | 1239 | 1.5 | [0.8; 2.3] | 18.2 | [16.2; 20.3] | 2.1 | [1.2; 3.0] | 58.4 | [55.5; 61.3] | 13.2 | [11.4; 15.0] |
| <b>Barbados</b>                        | 2012 | 202  | 0.0 | -          | 19.6 | [14.1; 25.0] | 0.2 | [0.0; 0.6] | 8.7  | [4.5; 13.0]  | 3.2  | [0.4; 5.9]   |
| <b>Belize</b>                          | 2015 | 1062 | 1.8 | [0.2; 3.5] | 22.6 | [19.3; 25.8] | 4.8 | [2.4; 7.2] | 46.2 | [41.2; 51.1] | 15.6 | [12.7; 18.6] |
| <b>Costa Rica</b>                      | 2011 | 883  | 1.1 | [0.2; 1.9] | 20.4 | [16.0; 24.9] | 0.4 | [0.0; 0.8] | 74.3 | [68.2; 80.5] | 18.2 | [13.7; 22.6] |
| <b>Cuba</b>                            | 2014 | 2172 | 0.2 | [0.0; 0.9] | 10.8 | [8.0; 13.5]  | 1.8 | [0.0; 4.7] | 79.2 | [72.6; 85.7] | 9.9  | [7.0; 12.9]  |
| <b>Dominican Republic</b>              | 2014 | 8058 | 2.0 | [1.3; 2.7] | 14.9 | [13.6; 16.2] | 2.0 | [1.4; 2.7] | 79.4 | [77.8; 81.0] | 14.5 | [13.2; 15.8] |
| <b>El Salvador</b>                     | 2014 | 2995 | 2.1 | [1.3; 2.8] | 19.3 | [17.4; 21.1] | 2.4 | [1.3; 3.4] | 81.6 | [79.3; 83.9] | 18.2 | [16.4; 19.9] |
| <b>Guyana</b>                          | 2014 | 1336 | 1.7 | [0.7; 2.6] | 25.0 | [22.1; 27.9] | 3.5 | [2.0; 5.0] | 33.5 | [30.1; 36.9] | 11.4 | [9.1; 13.7]  |
| <b>Jamaica</b>                         | 2011 | 662  | 1.3 | [0.2; 2.5] | 21.3 | [17.0; 25.5] | 2.7 | [1.3; 4.2] | 33.5 | [27.9; 39.1] | 10   | [7.3; 12.7]  |
| <b>Mexico</b>                          | 2015 | 3414 | 0.6 | [0.0; 1.3] | 21.1 | [18.2; 23.9] | 1.3 | [0.7; 1.9] | 78.2 | [74.7; 81.7] | 17.3 | [14.7; 19.9] |
| <b>Panama</b>                          | 2013 | 2315 | 0.7 | [0.2; 1.1] | 18.6 | [15.1; 22.0] | 3.7 | [2.3; 5.1] | 81.2 | [77.6; 84.7] | 18.9 | [15.6; 22.3] |
| <b>Paraguay</b>                        | 2016 | 1845 | 1.2 | [0.3; 2.1] | 17.9 | [15.5; 20.3] | 3.1 | [1.6; 4.5] | 77.2 | [74.2; 80.2] | 17.2 | [14.7; 19.7] |
| <b>St Lucia</b>                        | 2012 | 123  | 1.1 | [0.0; 3.2] | 12.8 | [6.4; 19.2]  | 1.2 | [0.0; 3.0] | 23.4 | [13.4; 33.3] | 6.9  | [1.7; 12.1]  |
| <b>Suriname</b>                        | 2010 | 1278 | 2.1 | [1.3; 3.0] | 32.6 | [29.1; 36.0] | 2.8 | [1.7; 3.9] | 79.1 | [75.8; 82.5] | 28.7 | [25.4; 32.0] |
| <b>Trinidad and Tobago</b>             | 2011 | 523  | 1.6 | [0.4; 2.8] | 20.1 | [15.8; 24.4] | 3.0 | [1.1; 4.8] | 17.2 | [12.9; 21.5] | 6    | [3.2; 8.8]   |
| <b>Uruguay</b>                         | 2012 | 652  | 2.1 | [0.0; 4.3] | 19.8 | [12.0; 27.6] | 1.8 | [0.0; 3.8] | 50.1 | [40.8; 59.4] | 12.7 | [6.0; 19.4]  |

Table S2. Prevalence of suspected developmental delay in each studied country for the physical domain; countries grouped by world region. Source: MICS and DHS surveys, 2010-2016.

| Country                               | Wealth quintile (%) |              |      |              |      |              |      |              |         | Measures of inequality |                  |              |                  |                |
|---------------------------------------|---------------------|--------------|------|--------------|------|--------------|------|--------------|---------|------------------------|------------------|--------------|------------------|----------------|
|                                       | Poorest             | IC95%        | Q2   | IC95%        | Q3   | IC95%        | Q4   | IC95%        | Richest | IC95%                  | SII <sup>1</sup> | IC95%        | CIX <sup>2</sup> | IC95%          |
| <b>West &amp; Central Africa</b>      |                     |              |      |              |      |              |      |              |         |                        |                  |              |                  |                |
| Benin                                 | 4.8                 | [3.1; 6.5]   | 5.3  | [3.3; 7.3]   | 5.3  | [3.0; 7.5]   | 4.3  | [2.8; 5.7]   | 4.7     | [1.9; 7.5]             | -0.8             | [-1.0; -0.5] | -4.2             | [-4.8; -3.5]   |
| Cameroon                              | 1.9                 | [0.9; 3.0]   | 2.5  | [1.3; 3.8]   | 3.1  | [1.2; 4.9]   | 1.9  | [0.9; 2.9]   | 2.9     | [1.3; 4.5]             | 0.7              | [0.4; 1.1]   | 5.6              | [4.0; 7.1]     |
| CAR                                   | 4.7                 | [2.5; 6.9]   | 3.6  | [2.3; 5.0]   | 3.6  | [2.0; 5.1]   | 3.7  | [2.0; 5.3]   | 4.1     | [1.3; 6.8]             | -1.0             | [-1.1; -0.9] | 0.9              | [0.4; 1.3]     |
| Chad                                  | 16.8                | [13.5; 20.1] | 17.4 | [14.2; 20.6] | 15.8 | [12.5; 19.2] | 14.6 | [11.9; 17.3] | 18.3    | [15.0; 21.6]           | -0.4             | [-0.5; -0.2] | 1.1              | [1.0; 1.1]     |
| Congo Brazzaville                     | 5.0                 | [3.4; 6.5]   | 2.7  | [1.5; 3.8]   | 2.1  | [1.0; 3.3]   | 2.2  | [0.7; 3.7]   | 1.2     | [0.0; 2.4]             | -7.2             | [-7.7; -6.7] | -20.9            | [-22.1; -19.7] |
| Congo DR                              | 6.2                 | [3.9; 8.4]   | 8.1  | [5.1; 11.1]  | 8.0  | [4.6; 11.5]  | 8.1  | [4.7; 11.5]  | 4.3     | [2.2; 6.5]             | -4.1             | [-4.3; -3.8] | -1.8             | [-1.9; -1.8]   |
| Côte D'Ivoire                         | 4.1                 | [2.3; 5.8]   | 3.5  | [1.9; 5.1]   | 3.1  | [1.5; 4.7]   | 3.2  | [1.5; 4.8]   | 0.9     | [0.0; 1.9]             | -3.7             | [-4.2; -3.3] | -14.1            | [-15.4; -12.9] |
| Gambia                                | 2.7                 | [1.4; 4.0]   | 2.7  | [1.2; 4.2]   | 1.8  | [0.9; 2.8]   | 1.9  | [0.9; 2.9]   | 0.9     | [0.1; 1.7]             | -2.6             | [-2.7; -2.5] | -17.6            | [-18.2; -16.9] |
| Ghana                                 | 3.2                 | [1.9; 4.5]   | 1.5  | [0.2; 2.8]   | 3.4  | [1.4; 5.4]   | 3.5  | [1.0; 6.1]   | 1.1     | [0.0; 2.5]             | -1.3             | [-1.4; -1.1] | -9.8             | [-10.2; -9.4]  |
| Guinea                                | 9.5                 | [6.6; 12.4]  | 5.9  | [3.8; 8.1]   | 7.0  | [4.5; 9.5]   | 6.3  | [3.8; 8.8]   | 9.3     | [4.3; 14.3]            | -1.2             | [-1.4; -1.0] | 1.7              | [1.5; 2.0]     |
| Guinea Bissau                         | 7.9                 | [5.3; 10.5]  | 9.8  | [7.4; 12.3]  | 11.5 | [7.4; 15.6]  | 11.9 | [7.4; 16.3]  | 12.1    | [6.9; 17.4]            | 5.8              | [5.7; 6.0]   | 3.5              | [3.2; 3.7]     |
| Mali                                  | 5.7                 | [4.1; 7.2]   | 4.7  | [3.0; 6.3]   | 4.5  | [3.3; 5.7]   | 4.0  | [2.8; 5.3]   | 4.0     | [2.9; 5.0]             | -2.8             | [-3.0; -2.6] | -7.0             | [-7.5; -6.4]   |
| Mauritania                            | 9.7                 | [7.0; 12.4]  | 7.6  | [5.4; 9.8]   | 7.7  | [5.6; 9.8]   | 6.3  | [4.0; 8.6]   | 5.1     | [3.3; 7.0]             | -5.9             | [-6.2; -5.6] | -11.8            | [-12.4; -11.3] |
| Nigeria                               | 11.9                | [10.2; 13.5] | 12.1 | [10.4; 13.7] | 8.7  | [7.1; 10.3]  | 7.9  | [6.4; 9.4]   | 6.0     | [4.7; 7.3]             | -8.5             | [-8.7; -8.3] | -13.5            | [-13.7; -13.2] |
| S Tome and Principe                   | 5.3                 | [1.8; 8.9]   | 4.2  | [1.6; 6.9]   | 5.9  | [1.8; 10.0]  | 4.3  | [1.0; 7.7]   | 3.2     | [0.0; 6.6]             | -1.5             | [-2.4; -0.6] | -7.7             | [-10.1; -5.3]  |
| Sierra Leone                          | 10.0                | [7.3; 12.8]  | 10.0 | [7.3; 12.8]  | 11.0 | [8.2; 13.9]  | 12.8 | [9.4; 16.2]  | 9.5     | [6.5; 12.6]            | 1.5              | [1.2; 1.7]   | 0.1              | [-0.2; 0.5]    |
| Togo                                  | 5.2                 | [3.2; 7.2]   | 7.0  | [4.1; 9.9]   | 7.0  | [4.0; 9.9]   | 8.1  | [4.4; 11.8]  | 6.0     | [3.1; 9.0]             | 2.2              | [1.8; 2.6]   | 1.8              | [0.9; 2.6]     |
| <b>Eastern &amp; Southern Africa</b>  |                     |              |      |              |      |              |      |              |         |                        |                  |              |                  |                |
| Burundi                               | 10.1                | [8.0; 12.2]  | 7.9  | [5.7; 10.1]  | 8.5  | [6.6; 10.3]  | 5.4  | [3.7; 7.0]   | 4.3     | [2.7; 6.0]             | -7.3             | [-7.4; -7.1] | -15.1            | [-15.4; -14.7] |
| Eswatini                              | 6.2                 | [3.3; 9.0]   | 7.5  | [4.2; 10.8]  | 8.6  | [4.1; 13.0]  | 8.5  | [3.7; 13.3]  | 2.2     | [0.0; 4.9]             | -0.7             | [-1.6; 0.1]  | -5.3             | [-6.8; -3.9]   |
| Malawi                                | 10.3                | [8.4; 12.3]  | 10.5 | [8.5; 12.6]  | 10.5 | [8.3; 12.7]  | 8.6  | [6.6; 10.6]  | 6.8     | [0.4; 9.6]             | -4.7             | [-5.0; -4.3] | -6.7             | [-7.2; -6.1]   |
| Rwanda                                | 6.1                 | [4.2; 8.1]   | 4.2  | [2.6; 5.8]   | 5.2  | [3.2; 7.1]   | 3.4  | [1.6; 5.2]   | 5.2     | [2.5; 7.9]             | -1.6             | [-1.7; -1.5] | 0.3              | [0.2; 0.5]     |
| Uganda                                | 12.9                | [10.3; 15.6] | 11.2 | [8.9; 13.5]  | 8.1  | [5.7; 10.6]  | 8.0  | [5.4; 10.5]  | 5.6     | [3.4; 7.8]             | -9.1             | [-9.2; -9.1] | -14.1            | [-14.2; -13.9] |
| Zimbabwe                              | 5.5                 | [3.9; 7.2]   | 6.1  | [4.3; 7.8]   | 5.6  | [3.8; 7.4]   | 5.0  | [3.5; 6.5]   | 4.3     | [2.7; 5.8]             | -2.1             | [-2.7; -1.6] | -4.6             | [-5.8; -3.5]   |
| <b>Middle East &amp; North Africa</b> |                     |              |      |              |      |              |      |              |         |                        |                  |              |                  |                |
| Algeria                               | 4.3                 | [2.7; 5.9]   | 3.7  | [2.4; 5.1]   | 6.0  | [3.9; 8.1]   | 3.2  | [1.9; 4.6]   | 3.0     | [1.5; 4.5]             | -1.4             | [-1.4; -1.3] | -9.6             | [-9.8; -9.4]   |
| Iraq                                  | 5.4                 | [4.3; 6.5]   | 5.4  | [4.2; 6.7]   | 4.5  | [3.3; 5.6]   | 5.2  | [3.8; 6.7]   | 4.5     | [2.5; 6.6]             | -1.1             | [-1.1; -1.0] | -4.9             | [-5.1; -4.7]   |
| Jordan                                | 1.8                 | [0.0; 3.7]   | 0.6  | [0.0; 1.1]   | 0.8  | [0.0; 1.8]   | 1.6  | [0.6; 2.6]   | 0.2     | [0.0; 0.4]             | -1.1             | [-1.2; -1.0] | -10.9            | [-11.7; -10.2] |
| State of Palestine                    | 1.6                 | [0.6; 2.5]   | 2.0  | [0.8; 3.1]   | 2.3  | [0.9; 3.8]   | 1.8  | [0.7; 2.9]   | 1.7     | [0.6; 2.8]             | 0.0              | [-0.5; 0.4]  | -2.0             | [-4.0; 0.1]    |
| Tunisia                               | 3.4                 | [1.4; 5.3]   | 4.2  | [1.6; 6.8]   | 1.7  | [0.0; 3.7]   | 3.4  | [0.7; 6.1]   | 2.5     | [0.0; 5.1]             | -1.3             | [-1.5; -1.0] | -4.5             | [-5.5; -3.5]   |
| <b>Europe &amp; Central Asia</b>      |                     |              |      |              |      |              |      |              |         |                        |                  |              |                  |                |
| Belarus                               | 0.2                 | [0.0; 0.6]   | 0.3  | [0.0; 0.6]   | 1.2  | [0.0; 2.8]   | 1.5  | [0.0; 3.1]   | 0.2     | [0.0; 0.5]             | 0.3              | [0.2; 0.4]   | 13.5             | [12.3; 14.8]   |



|                                      |     |            |     |            |     |            |     |             |     |            |       |                |       |                |
|--------------------------------------|-----|------------|-----|------------|-----|------------|-----|-------------|-----|------------|-------|----------------|-------|----------------|
| <b>Bosnia and Herzegovina</b>        | 0.4 | [0.0; 1.2] | 0.0 | -          | 0.7 | [0.0; 1.9] | 0.3 | [0.0; 1.0]  | 0.0 | -          | -0.4  | [-0.4; -0.3]   | -9.0  | [-10.8; -7.2]  |
| <b>Kazakhstan</b>                    | 0.6 | [0.0; 1.3] | 0.5 | [0.0; 1.1] | 0.4 | [0.0; 1.0] | 0.5 | [0.0; 1.2]  | 0.5 | [0.0; 1.2] | 0.0   | [-0.3; 0.3]    | -1.1  | [-4.3; 2.0]    |
| <b>Kosovo</b>                        | 0.8 | [0.0; 2.3] | 2.0 | [0.0; 5.2] | 1.3 | [0.0; 3.4] | 0.8 | [0.0; 2.4]  | 0.7 | [0.0; 1.9] | -1.2  | [-2.0; -0.4]   | -1.4  | [-6.9; 4.0]    |
| <b>Kyrgyzstan</b>                    | 2.5 | [0.9; 4.2] | 2.8 | [0.9; 4.7] | 2.0 | [0.7; 3.4] | 1.7 | [0.4; 3.0]  | 2.2 | [0.5; 4.0] | -1.6  | [-2.4; -0.9]   | -4.9  | [-7.4; -2.3]   |
| <b>Macedonia</b>                     | 0.0 | -          | 0.0 | -          | 0.0 | -          | 0.0 | -           | 0.0 | -          | 0.0   | [-0.3; 0.2]    | 5.4   | [-6.1; 16.9]   |
| <b>Moldova</b>                       | 1.6 | [0.0; 3.8] | 0.4 | [0.0; 1.6] | 0.0 | -          | 0.0 | -           | 0.1 | [0.0; 0.5] | -2.8  | [-3.5; -2.1]   | -74.3 | [-80.6; -68.0] |
| <b>Montenegro</b>                    | 0.0 | [0.0; 0.0] | 0.0 | [0.0; 0.0] | 0.0 | -          | 0.0 | [0.0; 0.0]  | 0.0 | [0.0; 0.0] | 0.9   | [-0.8; 2.5]    | -6.7  | [-28.2; 14.7]  |
| <b>Turkmenistan</b>                  | 0.3 | [0.0; 1.0] | 0.2 | [0.0; 0.6] | 0.2 | [0.0; 0.8] | 0.3 | [0.0; 1.2]  | 0.2 | [0.0; 0.9] | 0.5   | [-0.2; 1.2]    | 2.2   | [-2.5; 6.9]    |
| <b>Ukraine</b>                       | 1.0 | [0.0; 2.4] | 0.4 | [0.0; 1.2] | 0.4 | [0.0; 1.2] | 0.3 | [0.0; 0.9]  | 0.2 | [0.0; 0.6] | -3.3  | [-3.9; -2.6]   | -23.8 | [-27.2; -20.4] |
| <b>South Asia</b>                    |     |            |     |            |     |            |     |             |     |            |       |                |       |                |
| <b>Bangladesh</b>                    | 7.1 | [5.4; 8.7] | 7.3 | [5.7; 8.9] | 7.6 | [5.8; 9.4] | 8.5 | [6.5; 10.6] | 6.0 | [4.2; 7.8] | 0.4   | [0.2; 0.5]     | -2.6  | [-2.9; -2.2]   |
| <b>Bhutan</b>                        | 2.2 | [0.5; 4.0] | 1.5 | [0.4; 2.6] | 2.2 | [0.5; 3.9] | 1.2 | [0.0; 2.3]  | 1.9 | [0.2; 3.6] | -0.6  | [-0.7; -0.6]   | -7.5  | [-7.6; -7.5]   |
| <b>Nepal</b>                         | 4.9 | [3.3; 6.4] | 2.2 | [0.6; 3.9] | 3.9 | [1.7; 6.1] | 3.8 | [1.1; 6.4]  | 2.2 | [0.0; 4.7] | -2.8  | [-3.0; -2.7]   | -6.5  | [-7.0; -6.0]   |
| <b>East Asia &amp; the Pacific</b>   |     |            |     |            |     |            |     |             |     |            |       |                |       |                |
| <b>Cambodia</b>                      | 5.2 | [2.8; 7.5] | 3.1 | [1.4; 4.9] | 1.9 | [0.0; 3.1] | 3.6 | [1.4; 5.8]  | 3.1 | [1.2; 5.0] | -2.4  | [-2.5; -2.2]   | -8.6  | [-9.0; -8.3]   |
| <b>Lao</b>                           | 1.9 | [1.1; 2.7] | 2.9 | [1.6; 4.2] | 2.0 | [1.0; 3.0] | 1.3 | [0.3; 2.2]  | 0.4 | [0.0; 0.9] | -1.7  | [-1.8; -1.5]   | -21.2 | [-21.9; -20.6] |
| <b>Mongolia</b>                      | 0.6 | [0.0; 1.4] | 0.5 | [0.0; 1.1] | 0.5 | [0.0; 1.1] | 0.5 | [0.0; 1.1]  | 0.7 | [0.0; 1.6] | 0.2   | [0.0; 0.3]     | 4.6   | [2.4; 6.7]     |
| <b>Thailand</b>                      | 1.1 | [0.1; 2.0] | 0.9 | [0.0; 1.6] | 2.0 | [0.3; 3.6] | 1.6 | [0.3; 2.9]  | 2.1 | [0.0; 5.7] | 2.1   | [1.9; 2.3]     | 16.7  | [15.6; 17.9]   |
| <b>Vietnam</b>                       | 4.2 | [1.1; 7.4] | 2.3 | [0.3; 4.2] | 2.5 | [0.3; 4.6] | 1.2 | [0.0; 2.7]  | 1.8 | [0.1; 3.4] | -5.2  | [-6.0; -4.4]   | -26.4 | [-29.0; -23.7] |
| <b>Latin America &amp; Caribbean</b> |     |            |     |            |     |            |     |             |     |            |       |                |       |                |
| <b>Argentina</b>                     | 2.3 | [0.8; 3.9] | 2.0 | [0.1; 4.0] | 1.1 | [0.3; 2.0] | 0.7 | [0.0; 2.0]  | 0.9 | [0.1; 1.7] | -2.3  | [-2.4; -2.3]   | -22.0 | [-22.4; -21.7] |
| <b>Belize</b>                        | 1.6 | [0.0; 3.3] | 0.9 | [0.0; 2.0] | 2.7 | [0.6; 4.7] | 2.3 | [0.0; 5.6]  | 2.3 | [0.0; 5.0] | 2.5   | [1.8; 3.2]     | 11.8  | [8.7; 14.9]    |
| <b>Costa Rica</b>                    | 1.3 | [0.0; 3.4] | 0.2 | [0.0; 0.6] | 0.5 | [0.0; 1.4] | 2.9 | [0.0; 6.7]  | 0.0 | -          | -1.0  | [-1.8; -0.2]   | -9.5  | [-12.8; -6.1]  |
| <b>Dominican Republic</b>            | 2.4 | [1.3; 3.5] | 1.9 | [1.0; 2.9] | 1.5 | [0.7; 2.3] | 1.8 | [0.9; 2.7]  | 2.6 | [1.0; 4.2] | -0.7  | [-1.2; -0.2]   | -1.7  | [-3.2; -0.1]   |
| <b>El Salvador</b>                   | 2.5 | [1.2; 3.8] | 2.5 | [1.4; 3.7] | 2.4 | [1.2; 3.7] | 1.0 | [0.3; 1.7]  | 1.5 | [0.5; 2.6] | -2.9  | [-3.4; -2.5]   | -13.9 | [-15.9; -12.0] |
| <b>Guyana</b>                        | 2.5 | [0.9; 4.0] | 1.0 | [0.0; 2.1] | 1.8 | [0.0; 3.6] | 1.3 | [0.0; 2.7]  | 1.1 | [0.0; 2.3] | -3.3  | [-3.9; -2.6]   | -28.2 | [-31.4; -25.0] |
| <b>Jamaica</b>                       | 2.1 | [0.0; 5.5] | 1.6 | [0.0; 3.7] | 0.0 | -          | 2.5 | [0.2; 4.9]  | 0.0 | -          | -2.0  | [-2.5; -1.5]   | -17.4 | [-20.0; -14.8] |
| <b>Mexico</b>                        | 0.8 | [0.0; 1.7] | 0.6 | [0.0; 1.5] | 0.6 | [0.0; 1.3] | 0.5 | [0.0; 1.1]  | 0.5 | [0.0; 1.3] | -1.6  | [-2.0; -1.3]   | -6.7  | [-9.4; -4.0]   |
| <b>Panama</b>                        | 1.8 | [0.3; 3.2] | 0.4 | [0.0; 0.8] | 0.1 | [0.0; 0.2] | 0.3 | [0.0; 0.8]  | 0.0 | -          | -6.1  | [-6.4; -5.9]   | -50.3 | [-51.7; -48.9] |
| <b>Paraguay</b>                      | 1.2 | [0.0; 2.5] | 1.4 | [0.0; 2.9] | 1.8 | [0.4; 3.2] | 0.6 | [0.0; 1.3]  | 1.0 | [0.1; 1.9] | -1.1  | [-1.5; -0.7]   | -7.4  | [-10.3; -4.6]  |
| <b>Suriname</b>                      | 3.1 | [1.7; 4.6] | 1.5 | [0.3; 2.7] | 1.2 | [0.0; 3.2] | 2.3 | [0.0; 5.6]  | 1.1 | [0.0; 3.2] | -3.4  | [-3.5; -3.2]   | -19.9 | [-20.4; -19.4] |
| <b>Trinidad and Tobago</b>           | 5.1 | [1.1; 9.1] | 0.0 | -          | 0.9 | [0.0; 2.9] | 0.0 | -           | 0.0 | -          | -10.9 | [-11.6; -10.1] | -50.5 | [-55.2; -45.9] |
| <b>Uruguay</b>                       | 4.0 | [0.0; 9.6] | 3.0 | [0.0; 7.4] | 0.0 | -          | 0.8 | [0.0; 2.4]  | 0.0 | -          | -8.7  | [-9.2; -8.2]   | -29.1 | [-30.7; -27.5] |

Note: <sup>1</sup> Slope Index of Inequality; <sup>2</sup> Concentration Index

Table S3. Prevalence of suspected developmental delay in each studied country for the social-emotional domain; countries grouped by world region. Source: MICS and DHS surveys, 2010-2016.

| Country                               | Wealth quintile (%) |              |      |              |      |              |      |              |         | Measures of inequality |                  |                |                  |                |
|---------------------------------------|---------------------|--------------|------|--------------|------|--------------|------|--------------|---------|------------------------|------------------|----------------|------------------|----------------|
|                                       | Poorest             | IC95%        | Q2   | IC95%        | Q3   | IC95%        | Q4   | IC95%        | Richest | IC95%                  | SHI <sup>1</sup> | IC95%          | CIX <sup>2</sup> | IC95%          |
| <b>West &amp; Central Africa</b>      |                     |              |      |              |      |              |      |              |         |                        |                  |                |                  |                |
| Benin                                 | 27.8                | [24.0; 31.5] | 28.5 | [24.7; 32.3] | 28.5 | [24.3; 32.7] | 32.0 | [27.8; 36.1] | 25.4    | [21.6; 29.1]           | -1.7             | [-2.0; -1.4]   | -1.4             | [-1.6; -1.3]   |
| Cameroon                              | 30.7                | [26.1; 35.3] | 30.4 | [25.7; 35.1] | 34.7 | [30.3; 39.2] | 31.3 | [26.4; 36.2] | 31.0    | [25.8; 36.2]           | 1.1              | [0.9; 1.3]     | 0.2              | [0.1; 0.3]     |
| CAR                                   | 37.2                | [32.4; 42.0] | 40.7 | [36.8; 44.7] | 41.1 | [36.0; 46.2] | 46.4 | [40.6; 52.1] | 47.6    | [40.7; 54.4]           | 11.9             | [11.8; 12.1]   | 3.0              | [2.9; 3.1]     |
| Chad                                  | 37.3                | [33.1; 41.6] | 41.2 | [37.2; 45.2] | 41.5 | [36.9; 46.2] | 42.5 | [37.0; 48.0] | 39.1    | [33.8; 44.4]           | 3.0              | [2.8; 3.3]     | -0.4             | [-0.5; -0.4]   |
| Congo Brazzaville                     | 46.9                | [43.6; 50.2] | 37.7 | [32.6; 42.8] | 28.6 | [22.8; 34.4] | 35.9 | [29.6; 42.1] | 28.0    | [21.8; 34.2]           | -24.9            | [-25.4; -24.4] | -8.7             | [-8.8; -8.5]   |
| Congo DR                              | 23.4                | [17.6; 29.2] | 23.9 | [18.3; 29.4] | 23.0 | [17.7; 28.3] | 19.2 | [13.5; 25.0] | 15.0    | [10.5; 19.5]           | -7.7             | [-7.9; -7.4]   | -2.3             | [-2.4; -2.2]   |
| Côte D'Ivoire                         | 24.8                | [21.3; 28.3] | 29.4 | [24.8; 34.0] | 32.8 | [28.3; 37.3] | 35.3 | [28.7; 41.9] | 37.0    | [30.0; 43.9]           | 15.0             | [14.9; 15.1]   | 6.6              | [6.5; 6.7]     |
| Gambia                                | 31.3                | [27.4; 35.2] | 28.5 | [24.6; 32.5] | 34.4 | [29.4; 39.4] | 29.3 | [24.4; 34.3] | 32.9    | [27.6; 38.3]           | 1.3              | [1.1; 1.6]     | 0.7              | [0.6; 0.8]     |
| Ghana                                 | 23.3                | [19.5; 27.1] | 26.5 | [21.8; 31.2] | 29.0 | [22.7; 35.4] | 27.9 | [21.6; 34.1] | 26.8    | [19.4; 34.1]           | 7.3              | [6.9; 7.7]     | 1.3              | [1.0; 1.5]     |
| Guinea                                | 43.4                | [38.3; 48.5] | 36.0 | [31.9; 40.1] | 36.7 | [31.7; 41.8] | 32.5 | [28.1; 36.9] | 44.6    | [38.7; 50.5]           | -3.8             | [-4.5; -3.2]   | 0.6              | [0.6; 0.7]     |
| Guinea Bissau                         | 19.5                | [15.8; 23.2] | 25.4 | [21.4; 29.4] | 27.9 | [23.2; 32.6] | 32.9 | [26.6; 39.3] | 29.4    | [20.5; 38.2]           | 15.9             | [15.4; 16.3]   | 4.0              | [3.8; 4.3]     |
| Mali                                  | 25.0                | [21.9; 28.1] | 24.9 | [21.6; 28.3] | 23.1 | [20.2; 26.0] | 29.5 | [26.3; 32.8] | 34.2    | [31.0; 37.3]           | 11.0             | [10.8; 11.1]   | 7.0              | [6.9; 7.1]     |
| Mauritania                            | 38.7                | [33.6; 43.9] | 33.7 | [29.7; 37.7] | 33.4 | [29.1; 37.6] | 28.6 | [24.1; 33.0] | 33.9    | [28.3; 39.6]           | -7.9             | [-8.2; -7.7]   | -3.0             | [-3.0; -2.9]   |
| Nigeria                               | 29.1                | [26.5; 31.7] | 30.1 | [27.4; 32.8] | 32.0 | [28.5; 35.6] | 26.9 | [23.8; 30.0] | 24.0    | [21.6; 26.4]           | -6.0             | [-6.1; -5.8]   | -4.5             | [-4.5; -4.5]   |
| S Tome and Principe                   | 35.6                | [27.8; 43.4] | 39.3 | [32.2; 46.4] | 45.0 | [35.7; 54.4] | 35.2 | [27.5; 42.9] | 29.9    | [21.3; 38.5]           | -2.9             | [-4.0; -1.9]   | -3.0             | [-3.2; -2.9]   |
| Sierra Leone                          | 39.5                | [34.6; 44.5] | 42.0 | [37.0; 46.9] | 41.1 | [35.6; 46.7] | 40.3 | [35.6; 45.1] | 41.0    | [35.4; 46.6]           | 1.1              | [0.8; 1.3]     | -0.3             | [-0.4; -0.3]   |
| Togo                                  | 26.8                | [21.9; 31.8] | 23.3 | [18.8; 27.7] | 24.5 | [20.0; 29.1] | 24.4 | [19.2; 29.5] | 22.3    | [17.4; 27.2]           | -5.0             | [-5.2; -4.8]   | -2.5             | [-2.7; -2.4]   |
| <b>Eastern &amp; Southern Africa</b>  |                     |              |      |              |      |              |      |              |         |                        |                  |                |                  |                |
| Burundi                               | 37.9                | [34.1; 41.8] | 40.3 | [36.6; 44.0] | 40.3 | [36.4; 44.2] | 43.4 | [38.9; 47.8] | 42.1    | [37.8; 46.3]           | 5.6              | [5.4; 5.8]     | 1.5              | [1.4; 1.6]     |
| Eswatini                              | 36.0                | [29.8; 42.1] | 34.9 | [28.0; 41.8] | 36.1 | [29.1; 43.1] | 30.8 | [21.8; 39.7] | 35.1    | [25.3; 44.8]           | -3.1             | [-4.4; -1.7]   | -2.4             | [-3.0; -1.8]   |
| Malawi                                | 29.2                | [25.8; 32.7] | 28.1 | [24.9; 31.3] | 25.9 | [22.9; 28.8] | 28.9 | [25.7; 32.0] | 29.4    | [25.5; 33.3]           | 0.0              | [-0.3; 0.2]    | 0.7              | [0.6; 0.8]     |
| Rwanda                                | 22.6                | [18.5; 26.7] | 19.7 | [15.6; 23.8] | 16.1 | [12.7; 19.5] | 16.6 | [12.9; 20.3] | 11.9    | [8.0; 15.8]            | -12.6            | [-12.8; -12.4] | -11.7            | [-12.0; -11.4] |
| Uganda                                | 31.4                | [27.7; 35.0] | 33.4 | [30.1; 36.7] | 33.7 | [29.9; 37.5] | 34.1 | [30.0; 38.2] | 29.2    | [25.4; 32.9]           | -0.4             | [-0.6; -0.1]   | -2.0             | [-2.1; -2.0]   |
| Zimbabwe                              | 28.7                | [25.0; 32.4] | 30.2 | [26.4; 33.9] | 32.6 | [28.7; 36.5] | 36.3 | [32.5; 40.0] | 35.9    | [31.7; 40.2]           | 10.4             | [10.0; 10.8]   | 4.9              | [4.7; 5.1]     |
| <b>Middle East &amp; North Africa</b> |                     |              |      |              |      |              |      |              |         |                        |                  |                |                  |                |
| Algeria                               | 26.8                | [22.9; 30.8] | 29.3 | [25.8; 32.8] | 30.2 | [26.5; 33.9] | 31.0 | [27.3; 34.8] | 30.4    | [26.0; 34.8]           | 4.8              | [4.8; 4.9]     | 2.0              | [1.9; 2.0]     |
| Iraq                                  | 23.3                | [21.3; 25.4] | 23.8 | [21.3; 26.2] | 22.9 | [20.2; 25.6] | 19.8 | [17.0; 22.7] | 19.9    | [16.3; 23.6]           | -4.1             | [-4.2; -4.0]   | -3.5             | [-3.6; -3.5]   |
| Jordan                                | 37.1                | [31.3; 43.0] | 31.8 | [26.6; 36.9] | 22.9 | [17.1; 28.6] | 25.4 | [19.7; 31.2] | 26.0    | [17.1; 34.9]           | -17.6            | [-17.9; -17.4] | -6.2             | [-6.3; -6.0]   |
| State of Palestine                    | 37.7                | [33.9; 41.5] | 29.9 | [26.1; 33.6] | 26.3 | [22.8; 29.8] | 24.1 | [20.7; 27.5] | 18.7    | [15.3; 22.1]           | -22.3            | [-22.7; -21.8] | -13.1            | [-13.3; -12.8] |
| Tunisia                               | 29.0                | [23.1; 34.9] | 25.2 | [19.3; 31.1] | 23.8 | [16.7; 31.0] | 27.9 | [20.5; 35.3] | 14.2    | [8.2; 20.2]            | -11.4            | [-12.5; -10.3] | -9.0             | [-9.4; -8.6]   |
| <b>Europe &amp; Central Asia</b>      |                     |              |      |              |      |              |      |              |         |                        |                  |                |                  |                |
| Belarus                               | 11.2                | [4.8; 17.6]  | 9.2  | [4.9; 13.5]  | 11.8 | [6.2; 17.4]  | 9.0  | [4.3; 13.6]  | 10.4    | [7.2; 13.7]            | -0.5             | [-0.7; -0.3]   | -2.5             | [-2.7; -2.3]   |

|                                      |      |              |      |              |      |              |      |              |      |              |       |                |       |                |
|--------------------------------------|------|--------------|------|--------------|------|--------------|------|--------------|------|--------------|-------|----------------|-------|----------------|
| <b>Bosnia and Herzegovina</b>        | 3.6  | [1.0; 6.3]   | 5.9  | [0.0; 12.2]  | 4.0  | [1.5; 6.6]   | 1.6  | [0.0; 3.1]   | 7.3  | [1.3; 13.3]  | 2.1   | [1.7; 2.5]     | -6.3  | [-6.8; -5.7]   |
| <b>Kazakhstan</b>                    | 13.6 | [9.3; 17.8]  | 17.9 | [10.8; 24.9] | 19.7 | [14.7; 24.7] | 14.5 | [10.3; 18.6] | 19.1 | [13.8; 24.4] | 4.5   | [3.8; 5.2]     | 2.2   | [1.6; 2.8]     |
| <b>Kosovo</b>                        | 15.9 | [10.4; 21.4] | 20.8 | [13.1; 28.5] | 19.4 | [12.5; 26.2] | 9.8  | [4.5; 15.0]  | 11.7 | [5.7; 17.8]  | -8.8  | [-10.4; -7.1]  | -5.4  | [-7.0; -3.9]   |
| <b>Kyrgyzstan</b>                    | 15.0 | [10.8; 19.2] | 13.6 | [9.7; 17.5]  | 21.0 | [15.9; 26.0] | 15.5 | [10.4; 20.5] | 15.5 | [10.3; 20.7] | 2.7   | [1.8; 3.7]     | 0.6   | [-0.3; 1.4]    |
| <b>Macedonia</b>                     | 9.0  | [2.0; 16.0]  | 7.7  | [2.9; 12.6]  | 15.3 | [7.5; 23.1]  | 6.9  | [2.1; 11.7]  | 5.3  | [1.2; 9.4]   | -4.3  | [-4.9; -3.7]   | -4.8  | [-5.3; -4.2]   |
| <b>Moldova</b>                       | 28.3 | [19.4; 37.3] | 17.3 | [10.2; 24.4] | 16.6 | [9.3; 23.9]  | 18.6 | [11.5; 25.7] | 21.2 | [15.5; 26.9] | -2.2  | [-3.6; -0.7]   | -5.6  | [-6.2; -5.0]   |
| <b>Montenegro</b>                    | 4.2  | [0.2; 8.3]   | 6.8  | [1.9; 11.7]  | 1.9  | [0.0; 4.5]   | 7.8  | [0.4; 15.2]  | 4.1  | [0.2; 8.0]   | 0.4   | [-0.4; 1.1]    | 0.3   | [-1.7; 2.3]    |
| <b>Turkmenistan</b>                  | 8.8  | [5.5; 12.1]  | 5.0  | [2.2; 7.8]   | 2.6  | [0.4; 4.7]   | 5.0  | [2.0; 8.1]   | 5.1  | [2.4; 7.9]   | -3.2  | [-3.9; -2.6]   | -4.6  | [-5.8; -3.3]   |
| <b>Ukraine</b>                       | 14.8 | [9.8; 19.8]  | 14.1 | [9.3; 18.8]  | 17.5 | [11.8; 23.1] | 17.6 | [12.0; 23.1] | 16.1 | [10.9; 21.3] | 3.0   | [2.4; 3.6]     | 3.1   | [2.6; 3.7]     |
| <b>South Asia</b>                    |      |              |      |              |      |              |      |              |      |              |       |                |       |                |
| <b>Bangladesh</b>                    | 35.7 | [33.3; 38.1] | 33.3 | [30.8; 35.8] | 29.4 | [26.7; 32.2] | 30.6 | [27.4; 33.8] | 25.2 | [22.0; 28.4] | -11.6 | [-11.9; -11.4] | -5.1  | [-5.2; -5.0]   |
| <b>Bhutan</b>                        | 28.7 | [23.2; 34.2] | 27.8 | [23.8; 31.8] | 27.3 | [22.2; 32.4] | 32.3 | [25.6; 39.0] | 31.4 | [25.1; 37.8] | 4.3   | [3.9; 4.7]     | 1.8   | [1.6; 2.0]     |
| <b>Nepal</b>                         | 34.1 | [29.4; 38.7] | 34.2 | [27.9; 40.5] | 30.5 | [25.5; 35.5] | 34.3 | [28.1; 40.6] | 20.2 | [14.1; 26.4] | -10.2 | [-10.9; -9.5]  | -7.0  | [-7.2; -6.9]   |
| <b>East Asia &amp; the Pacific</b>   |      |              |      |              |      |              |      |              |      |              |       |                |       |                |
| <b>Cambodia</b>                      | 24.1 | [20.5; 27.6] | 24.9 | [20.6; 29.2] | 27.1 | [21.4; 32.9] | 28.3 | [22.5; 34.1] | 24.5 | [19.9; 29.1] | 1.9   | [1.7; 2.1]     | -0.4  | [-0.4; -0.4]   |
| <b>Lao</b>                           | 15.9 | [13.2; 18.7] | 15.7 | [13.2; 18.2] | 15.3 | [12.7; 17.9] | 12.9 | [10.1; 15.7] | 12.1 | [8.9; 15.3]  | -4.4  | [-4.4; -4.3]   | -4.4  | [-4.5; -4.4]   |
| <b>Mongolia</b>                      | 22.4 | [19.1; 25.6] | 23.2 | [18.8; 27.5] | 21.2 | [17.0; 25.3] | 28.6 | [23.5; 33.7] | 24.6 | [20.1; 29.0] | 4.8   | [4.3; 5.4]     | 3.9   | [3.5; 4.2]     |
| <b>Thailand</b>                      | 20.3 | [15.7; 24.9] | 22.2 | [17.3; 27.0] | 17.8 | [13.5; 22.1] | 23.3 | [17.7; 29.0] | 15.0 | [9.0; 20.9]  | -3.1  | [-3.5; -2.7]   | -4.4  | [-4.6; -4.1]   |
| <b>Vietnam</b>                       | 8.4  | [5.4; 11.3]  | 5.9  | [2.2; 9.6]   | 8.5  | [4.5; 12.5]  | 9.0  | [4.4; 13.6]  | 6.3  | [2.1; 10.5]  | -1.4  | [-2.4; -0.4]   | -4.5  | [-6.2; -2.7]   |
| <b>Latin America &amp; Caribbean</b> |      |              |      |              |      |              |      |              |      |              |       |                |       |                |
| <b>Argentina</b>                     | 25.0 | [20.4; 29.5] | 20.0 | [14.9; 25.0] | 14.8 | [10.6; 19.0] | 15.2 | [10.0; 20.4] | 11.0 | [7.2; 14.8]  | -17.4 | [-17.9; -17.0] | -14.5 | [-14.9; -14.1] |
| <b>Belize</b>                        | 28.3 | [21.5; 35.0] | 22.6 | [16.2; 29.0] | 28.7 | [22.4; 34.9] | 12.1 | [7.5; 16.8]  | 17.3 | [10.5; 24.1] | -16.5 | [-17.6; -15.5] | -11.9 | [-12.6; -11.2] |
| <b>Costa Rica</b>                    | 35.5 | [26.4; 44.5] | 15.9 | [9.0; 22.8]  | 11.4 | [5.6; 17.1]  | 18.6 | [7.4; 29.8]  | 6.7  | [0.6; 12.7]  | -35.6 | [-36.7; -34.6] | -23.9 | [-24.7; -23.2] |
| <b>Dominican Republic</b>            | 19.2 | [16.5; 21.9] | 14.2 | [11.9; 16.4] | 13.1 | [10.5; 15.6] | 13.7 | [10.2; 17.1] | 13.6 | [9.6; 17.5]  | -8.0  | [-8.5; -7.6]   | -7.0  | [-7.4; -6.5]   |
| <b>El Salvador</b>                   | 17.7 | [14.6; 20.9] | 21.2 | [17.5; 24.9] | 22.0 | [17.6; 26.4] | 18.1 | [13.7; 22.4] | 17.1 | [12.4; 21.7] | -1.6  | [-2.3; -0.8]   | -1.3  | [-1.9; -0.7]   |
| <b>Guyana</b>                        | 30.1 | [25.9; 34.2] | 21.1 | [14.1; 28.0] | 28.5 | [21.9; 35.2] | 21.6 | [14.7; 28.5] | 19.3 | [12.8; 25.8] | -13.2 | [-14.0; -12.3] | -11.5 | [-12.1; -10.9] |
| <b>Jamaica</b>                       | 32.1 | [22.8; 41.4] | 19.9 | [12.8; 26.9] | 18.6 | [10.5; 26.6] | 20.9 | [12.7; 29.1] | 10.2 | [1.5; 18.8]  | -20.9 | [-22.3; -19.5] | -16.7 | [-17.6; -15.9] |
| <b>Mexico</b>                        | 23.2 | [19.0; 27.3] | 22.7 | [18.5; 26.9] | 22.0 | [14.5; 29.6] | 22.0 | [16.2; 27.8] | 11.8 | [4.8; 18.9]  | -7.7  | [-8.4; -7.0]   | -6.1  | [-6.6; -5.6]   |
| <b>Panama</b>                        | 20.5 | [16.5; 24.6] | 24.6 | [15.6; 33.6] | 23.5 | [15.8; 31.1] | 12.7 | [5.1; 20.4]  | 4.6  | [0.8; 8.3]   | -9.6  | [-10.7; -8.6]  | -8.7  | [-9.0; -8.3]   |
| <b>Paraguay</b>                      | 18.3 | [14.2; 22.4] | 19.7 | [14.3; 25.1] | 22.4 | [16.2; 28.5] | 17.8 | [12.3; 23.2] | 9.8  | [5.5; 14.2]  | -7.3  | [-8.2; -6.4]   | -7.7  | [-8.4; -7.1]   |
| <b>Suriname</b>                      | 40.8 | [35.6; 46.0] | 26.8 | [19.3; 34.3] | 24.3 | [16.4; 32.2] | 25.8 | [16.4; 35.1] | 34.8 | [23.8; 45.8] | -22.8 | [-23.9; -21.6] | -10.4 | [-10.5; -10.3] |
| <b>Trinidad and Tobago</b>           | 20.4 | [12.7; 28.2] | 19.6 | [9.6; 29.6]  | 26.8 | [18.2; 35.4] | 10.8 | [4.1; 17.5]  | 19.1 | [10.0; 28.2] | -3.0  | [-5.3; -0.7]   | 2.6   | [1.2; 4.0]     |
| <b>Uruguay</b>                       | 23.3 | [9.1; 37.6]  | 31.8 | [9.9; 53.8]  | 10.7 | [2.5; 18.8]  | 19.8 | [2.3; 37.3]  | 6.9  | [2.6; 11.3]  | -23.3 | [-24.5; -22.1] | -18.3 | [-18.8; -17.8] |

Note: <sup>1</sup> Slope Index of Inequality; <sup>2</sup> Concentration Index

Table S4. Prevalence of suspected developmental delay in each studied country for the learning domain; countries grouped by world region. Source: MICS and DHS surveys, 2010-2016.

| Country                               | Wealth quintile (%) |              |      |              |      |              |      |              | Measures of inequality |              |                 |                |                  |                |
|---------------------------------------|---------------------|--------------|------|--------------|------|--------------|------|--------------|------------------------|--------------|-----------------|----------------|------------------|----------------|
|                                       | Poorest             | IC95%        | Q2   | IC95%        | Q3   | IC95%        | Q4   | IC95%        | Richest                | IC95%        | SH <sup>1</sup> | IC95%          | CIX <sup>2</sup> | IC95%          |
| <b>West &amp; Central Africa</b>      |                     |              |      |              |      |              |      |              |                        |              |                 |                |                  |                |
| Benin                                 | 18.1                | [14.8; 21.4] | 17.7 | [14.3; 21.0] | 17.9 | [14.5; 21.2] | 18.3 | [14.7; 21.8] | 14.1                   | [11.3; 16.8] | -4.9            | [-5.5; -4.3]   | -4.5             | [-5.0; -4.0]   |
| Cameroon                              | 14.8                | [11.0; 18.7] | 14.1 | [10.9; 17.3] | 16.8 | [13.0; 20.7] | 10.2 | [7.2; 13.1]  | 10.4                   | [6.7; 14.1]  | -6.9            | [-7.9; -5.9]   | -7.3             | [-8.3; -6.3]   |
| CAR                                   | 28.1                | [23.4; 32.9] | 25.6 | [21.9; 29.3] | 21.0 | [17.6; 24.5] | 19.8 | [15.3; 24.3] | 18.1                   | [13.6; 22.6] | -13.3           | [-13.9; -12.7] | -6.7             | [-7.1; -6.3]   |
| Chad                                  | 43.8                | [39.1; 48.4] | 48.6 | [43.9; 53.4] | 46.4 | [41.9; 51.0] | 48.7 | [42.3; 55.1] | 37.3                   | [32.3; 42.2] | -5.4            | [-6.0; -4.8]   | -3.1             | [-3.3; -3.0]   |
| Congo Brazzaville                     | 18.5                | [14.8; 22.2] | 17.9 | [14.0; 21.9] | 14.3 | [10.6; 17.9] | 12.8 | [8.1; 17.5]  | 8.6                    | [4.9; 12.3]  | -9.7            | [-10.3; -9.1]  | -11.5            | [-12.0; -11.0] |
| Congo DR                              | 24.6                | [19.3; 29.9] | 23.7 | [18.2; 29.2] | 20.3 | [14.1; 26.6] | 12.9 | [8.5; 17.4]  | 11.5                   | [7.7; 15.3]  | -12.0           | [-12.2; -11.8] | -2.7             | [-2.8; -2.6]   |
| Côte D'Ivoire                         | 12.5                | [8.7; 16.2]  | 14.6 | [10.8; 18.4] | 10.9 | [7.9; 13.8]  | 8.3  | [5.7; 10.9]  | 5.8                    | [2.8; 8.8]   | -8.5            | [-9.1; -7.9]   | -12.8            | [-13.5; -12.1] |
| Gambia                                | 6.5                 | [4.6; 8.5]   | 6.2  | [3.8; 8.5]   | 4.4  | [2.6; 6.2]   | 3.9  | [2.0; 5.7]   | 1.9                    | [0.5; 3.3]   | -6.8            | [-7.1; -6.5]   | -18.1            | [-18.8; -17.4] |
| Ghana                                 | 11.9                | [9.5; 14.3]  | 9.1  | [6.0; 12.2]  | 13.5 | [9.0; 17.9]  | 9.8  | [5.1; 14.6]  | 7.6                    | [3.5; 11.7]  | -3.4            | [-3.7; -3.1]   | -4.5             | [-4.8; -4.1]   |
| Guinea                                | 20.3                | [16.0; 24.6] | 20.7 | [17.0; 24.5] | 20.4 | [16.2; 24.6] | 19.5 | [14.9; 24.1] | 12.7                   | [8.5; 16.9]  | -7.1            | [-7.9; -6.3]   | -7.4             | [-8.0; -6.8]   |
| Guinea Bissau                         | 13.1                | [10.4; 15.9] | 10.1 | [7.2; 13.1]  | 9.4  | [6.7; 12.1]  | 9.7  | [6.3; 13.1]  | 15.9                   | [11.1; 20.7] | -2.2            | [-3.1; -1.3]   | 3.2              | [2.2; 4.1]     |
| Mali                                  | 19.7                | [16.3; 23.0] | 13.7 | [11.1; 16.4] | 12.3 | [9.7; 14.8]  | 10.9 | [8.5; 13.3]  | 8.3                    | [6.5; 10.0]  | -15.4           | [-15.9; -14.9] | -14.8            | [-15.3; -14.3] |
| Mauritania                            | 20.9                | [16.7; 25.1] | 19.2 | [15.2; 23.1] | 19.4 | [15.2; 23.6] | 16.6 | [13.0; 20.2] | 15.8                   | [11.4; 20.2] | -7.1            | [-7.8; -6.5]   | -7.1             | [-7.6; -6.6]   |
| Nigeria                               | 25.9                | [23.2; 28.6] | 26.4 | [23.9; 28.9] | 24.7 | [20.8; 28.5] | 16.2 | [13.6; 18.8] | 9.8                    | [8.1; 11.5]  | -21.0           | [-21.4; -20.6] | -16.3            | [-16.6; -16.1] |
| S Tome and Principe                   | 24.5                | [18.5; 30.6] | 16.0 | [9.7; 22.3]  | 20.2 | [11.3; 29.0] | 21.1 | [14.0; 28.2] | 15.2                   | [7.7; 22.7]  | -5.6            | [-7.3; -3.9]   | -7.1             | [-8.3; -5.9]   |
| Sierra Leone                          | 29.7                | [25.6; 33.9] | 21.7 | [18.4; 25.0] | 20.2 | [16.4; 24.1] | 19.4 | [15.4; 23.4] | 17.0                   | [13.1; 21.0] | -15.1           | [-15.5; -14.7] | -9.8             | [-10.1; -9.5]  |
| Togo                                  | 37.7                | [32.8; 42.7] | 23.9 | [17.8; 30.1] | 28.4 | [23.3; 33.6] | 24.5 | [19.0; 29.9] | 27.0                   | [21.3; 32.6] | -16.0           | [-16.9; -15.2] | -4.3             | [-4.7; -3.9]   |
| <b>Eastern &amp; Southern Africa</b>  |                     |              |      |              |      |              |      |              |                        |              |                 |                |                  |                |
| Burundi                               | 42.4                | [38.8; 45.9] | 40.1 | [36.1; 44.1] | 32.8 | [29.4; 36.3] | 36.2 | [31.9; 40.6] | 25.2                   | [20.7; 29.7] | -19.4           | [-20.0; -18.9] | -10.1            | [-10.4; -9.8]  |
| Eswatini                              | 4.6                 | [1.7; 7.5]   | 6.9  | [3.3; 10.5]  | 7.9  | [3.9; 11.9]  | 4.0  | [0.8; 7.2]   | 0.4                    | [0.0; 1.4]   | -2.9            | [-3.8; -2.0]   | -11.4            | [-13.4; -9.5]  |
| Malawi                                | 23.4                | [20.2; 26.6] | 20.0 | [17.3; 22.7] | 19.1 | [16.5; 21.6] | 16.0 | [13.5; 18.5] | 14.0                   | [10.9; 17.2] | -11.6           | [-12.1; -11.2] | -8.8             | [-9.1; -8.4]   |
| Rwanda                                | 16.8                | [13.5; 20.0] | 16.2 | [12.9; 19.5] | 12.3 | [9.3; 15.3]  | 10.2 | [7.2; 13.2]  | 7.8                    | [5.0; 10.5]  | -12.8           | [-13.3; -12.3] | -11.5            | [-12.1; -10.9] |
| Uganda                                | 16.5                | [13.9; 19.1] | 16.4 | [13.3; 19.5] | 12.4 | [9.8; 15.1]  | 11.6 | [9.0; 14.2]  | 8.2                    | [5.8; 10.6]  | -10.6           | [-10.9; -10.4] | -11.1            | [-11.4; -10.9] |
| Zimbabwe                              | 13.0                | [10.5; 15.5] | 12.3 | [9.6; 15.0]  | 9.4  | [7.3; 11.5]  | 8.2  | [6.1; 10.3]  | 6.3                    | [4.5; 8.1]   | -10.2           | [-10.9; -9.4]  | -12.5            | [-13.4; -11.7] |
| <b>Middle East &amp; North Africa</b> |                     |              |      |              |      |              |      |              |                        |              |                 |                |                  |                |
| Algeria                               | 9.9                 | [8.0; 11.9]  | 10.8 | [7.5; 14.1]  | 8.7  | [6.6; 10.8]  | 9.8  | [7.6; 12.0]  | 9.6                    | [7.2; 12.0]  | -1.0            | [-1.3; -0.6]   | -2.7             | [-3.2; -2.2]   |
| Iraq                                  | 13.9                | [12.2; 15.7] | 10.6 | [8.9; 12.3]  | 9.7  | [7.9; 11.4]  | 9.7  | [7.7; 11.7]  | 5.5                    | [3.8; 7.1]   | -9.3            | [-9.5; -9.1]   | -14.1            | [-14.4; -13.8] |
| Jordan                                | 10.8                | [8.0; 13.6]  | 9.4  | [6.2; 12.7]  | 8.4  | [5.4; 11.5]  | 8.7  | [5.0; 12.5]  | 8.2                    | [2.8; 13.6]  | -3.3            | [-3.3; -3.2]   | -7.4             | [-7.5; -7.2]   |
| State of Palestine                    | 9.1                 | [6.6; 11.6]  | 8.2  | [6.0; 10.4]  | 6.6  | [4.8; 8.4]   | 6.3  | [4.5; 8.2]   | 4.4                    | [2.6; 6.2]   | -6.7            | [-7.2; -6.2]   | -14.3            | [-15.2; -13.3] |
| Tunisia                               | 8.2                 | [4.2; 12.2]  | 4.3  | [2.0; 6.7]   | 4.2  | [1.6; 6.9]   | 7.7  | [3.3; 12.1]  | 7.5                    | [2.2; 12.7]  | -0.4            | [-1.4; 0.6]    | 4.2              | [2.6; 5.8]     |
| <b>Europe &amp; Central Asia</b>      |                     |              |      |              |      |              |      |              |                        |              |                 |                |                  |                |
| Belarus                               | 0.0                 | -            | 0.0  | -            | 0.0  | -            | 0.1  | [0.0; 0.4]   | 0.0                    | [0.0; 0.0]   | 0.6             | [0.5; 0.8]     | 22.2             | [17.0; 27.4]   |

|                                      |      |              |      |              |      |              |      |              |      |             |       |                |       |                |
|--------------------------------------|------|--------------|------|--------------|------|--------------|------|--------------|------|-------------|-------|----------------|-------|----------------|
| <b>Bosnia and Herzegovina</b>        | 1.0  | [0.0; 2.5]   | 0.4  | [0.0; 1.3]   | 1.4  | [0.0; 3.0]   | 0.4  | [0.0; 1.2]   | 1.2  | [0.0; 2.4]  | 0.2   | [0.1; 0.2]     | -5.4  | [-5.8; -5.0]   |
| <b>Kazakhstan</b>                    | 2.3  | [0.7; 3.8]   | 2.0  | [0.2; 3.8]   | 1.2  | [0.3; 2.1]   | 2.3  | [0.7; 3.9]   | 1.3  | [0.3; 2.2]  | -1.1  | [-1.4; -0.8]   | -7.4  | [-9.3; -5.5]   |
| <b>Kosovo</b>                        | 3.4  | [0.1; 6.7]   | 4.8  | [0.9; 8.6]   | 3.3  | [0.0; 6.9]   | 1.1  | [0.0; 3.1]   | 2.4  | [0.0; 5.1]  | -3.6  | [-4.5; -2.7]   | -16.6 | [-20.4; -12.8] |
| <b>Kyrgyzstan</b>                    | 8.7  | [5.1; 12.2]  | 5.4  | [2.4; 8.4]   | 5.7  | [2.8; 8.6]   | 4.4  | [1.4; 7.3]   | 6.4  | [2.9; 10.0] | -4.8  | [-6.0; -3.6]   | -2.4  | [-4.3; -0.6]   |
| <b>Macedonia</b>                     | 2.7  | [0.0; 5.6]   | 3.1  | [0.0; 6.9]   | 0.7  | [0.0; 2.2]   | 0.0  | -            | 0.0  | -           | -6.0  | [-6.6; -5.4]   | -44.5 | [-48.6; -40.5] |
| <b>Moldova</b>                       | 1.1  | [0.0; 2.8]   | 0.0  | -            | 0.6  | [0.0; 2.3]   | 0.0  | -            | 0.0  | -           | -2.8  | [-3.5; -2.0]   | -66.6 | [-72.5; -60.7] |
| <b>Montenegro</b>                    | 1.5  | [0.0; 4.3]   | 1.1  | [0.0; 2.5]   | 0.0  | -            | 1.5  | [0.0; 4.9]   | 0.9  | [0.0; 2.2]  | -0.5  | [-1.1; 0.2]    | -12.0 | [-18.6; -5.3]  |
| <b>Turkmenistan</b>                  | 3.3  | [0.8; 5.8]   | 4.0  | [1.2; 6.9]   | 2.5  | [0.0; 5.1]   | 1.8  | [0.3; 3.3]   | 0.8  | [0.0; 1.8]  | -7.0  | [-8.0; -5.9]   | -24.6 | [-27.3; -22.0] |
| <b>Ukraine</b>                       | 2.2  | [0.7; 3.6]   | 1.1  | [0.2; 2.1]   | 1.5  | [0.3; 2.7]   | 1.2  | [0.2; 2.2]   | 0.7  | [0.1; 1.3]  | -3.2  | [-3.8; -2.6]   | -16.3 | [-19.0; -13.6] |
| <b>South Asia</b>                    |      |              |      |              |      |              |      |              |      |             |       |                |       |                |
| <b>Bangladesh</b>                    | 12.6 | [10.8; 14.4] | 12.4 | [10.6; 14.2] | 13.8 | [11.5; 16.1] | 12.7 | [10.1; 15.3] | 8.2  | [5.7; 10.7] | -2.7  | [-2.9; -2.5]   | -5.3  | [-5.6; -5.1]   |
| <b>Bhutan</b>                        | 6.2  | [3.6; 8.7]   | 6.5  | [4.0; 8.9]   | 6.1  | [3.7; 8.5]   | 6.8  | [3.8; 9.7]   | 4.6  | [2.4; 6.7]  | -1.7  | [-2.1; -1.3]   | -6.0  | [-6.9; -5.2]   |
| <b>Nepal</b>                         | 14.3 | [11.2; 17.4] | 21.7 | [15.4; 27.9] | 25.1 | [17.6; 32.5] | 15.7 | [11.0; 20.3] | 10.1 | [5.9; 14.4] | 1.4   | [0.5; 2.2]     | -6.5  | [-7.1; -6.0]   |
| <b>East Asia &amp; the Pacific</b>   |      |              |      |              |      |              |      |              |      |             |       |                |       |                |
| <b>Cambodia</b>                      | 14.4 | [10.8; 17.9] | 9.8  | [6.8; 12.8]  | 10.1 | [6.8; 13.4]  | 10.5 | [7.0; 14.0]  | 5.0  | [2.9; 7.0]  | -10.9 | [-11.2; -10.6] | -19.5 | [-19.8; -19.1] |
| <b>Lao</b>                           | 8.8  | [6.3; 11.3]  | 8.7  | [6.3; 11.1]  | 4.6  | [2.6; 6.5]   | 3.1  | [1.7; 4.5]   | 1.4  | [0.3; 2.4]  | -10.6 | [-10.9; -10.4] | -26.0 | [-26.4; -25.6] |
| <b>Mongolia</b>                      | 3.0  | [1.5; 4.5]   | 2.1  | [0.8; 3.4]   | 1.1  | [0.2; 1.9]   | 0.9  | [0.0; 1.7]   | 1.2  | [0.1; 2.3]  | -3.4  | [-3.7; -3.1]   | -21.0 | [-22.4; -19.7] |
| <b>Thailand</b>                      | 0.5  | [0.0; 1.2]   | 0.3  | [0.0; 0.8]   | 0.5  | [0.0; 1.4]   | 0.4  | [0.0; 0.9]   | 0.1  | [0.0; 0.3]  | -1.5  | [-1.8; -1.2]   | -13.7 | [-16.2; -11.3] |
| <b>Vietnam</b>                       | 12.4 | [7.7; 17.1]  | 2.2  | [0.4; 4.1]   | 2.2  | [0.4; 4.0]   | 3.6  | [1.5; 5.7]   | 2.6  | [0.4; 4.9]  | -14.5 | [-16.1; -13.0] | -39.8 | [-42.0; -37.6] |
| <b>Latin America &amp; Caribbean</b> |      |              |      |              |      |              |      |              |      |             |       |                |       |                |
| <b>Argentina</b>                     | 3.7  | [1.5; 6.0]   | 1.7  | [0.0; 3.5]   | 1.1  | [0.3; 2.0]   | 1.3  | [0.0; 2.9]   | 1.6  | [0.3; 2.8]  | -3.0  | [-3.1; -2.9]   | -24.3 | [-24.8; -23.8] |
| <b>Belize</b>                        | 7.0  | [3.0; 11.1]  | 4.9  | [0.6; 9.2]   | 5.8  | [2.8; 8.9]   | 2.5  | [0.0; 5.1]   | 2.3  | [0.1; 4.4]  | -8.1  | [-9.3; -6.9]   | -13.5 | [-16.2; -10.8] |
| <b>Costa Rica</b>                    | 1.1  | [0.0; 2.5]   | 0.2  | [0.0; 0.6]   | 0.0  | -            | 0.0  | -            | 0.0  | -           | -4.1  | [-4.3; -3.9]   | -63.0 | [-68.1; -57.9] |
| <b>Dominican Republic</b>            | 3.3  | [1.9; 4.7]   | 1.3  | [0.7; 1.9]   | 1.5  | [0.8; 2.3]   | 1.9  | [1.0; 2.7]   | 2.3  | [0.9; 3.7]  | -3.2  | [-3.8; -2.6]   | -12.2 | [-13.8; -10.6] |
| <b>El Salvador</b>                   | 4.0  | [1.9; 6.2]   | 3.5  | [1.7; 5.3]   | 1.5  | [0.7; 2.3]   | 0.7  | [0.1; 1.2]   | 1.6  | [0.5; 2.8]  | -6.7  | [-7.3; -6.0]   | -25.1 | [-27.0; -23.2] |
| <b>Guyana</b>                        | 5.9  | [3.0; 8.8]   | 3.9  | [0.9; 7.0]   | 1.8  | [0.3; 3.3]   | 1.6  | [0.0; 3.1]   | 1.9  | [0.2; 3.7]  | -9.8  | [-10.8; -8.7]  | -30.9 | [-33.7; -28.1] |
| <b>Jamaica</b>                       | 4.4  | [0.9; 7.9]   | 2.6  | [0.2; 5.0]   | 0.4  | [0.0; 1.3]   | 4.0  | [0.2; 7.9]   | 2.0  | [0.0; 5.7]  | -2.3  | [-2.6; -1.9]   | -13.0 | [-13.9; -12.2] |
| <b>Mexico</b>                        | 2.0  | [1.0; 3.0]   | 1.1  | [0.4; 1.8]   | 1.0  | [0.1; 2.0]   | 1.0  | [0.2; 1.7]   | 1.1  | [0.1; 2.0]  | -3.4  | [-3.9; -2.9]   | -16.1 | [-18.4; -13.9] |
| <b>Panama</b>                        | 6.0  | [3.9; 8.2]   | 3.3  | [0.0; 7.4]   | 3.1  | [0.0; 6.9]   | 2.4  | [0.0; 5.7]   | 1.4  | [0.0; 3.8]  | -8.4  | [-8.8; -7.9]   | -33.9 | [-35.0; -32.8] |
| <b>Paraguay</b>                      | 5.0  | [1.5; 8.5]   | 3.1  | [0.9; 5.2]   | 3.7  | [1.4; 6.0]   | 1.3  | [0.2; 2.3]   | 1.6  | [0.0; 3.6]  | -6.5  | [-7.1; -5.9]   | -28.3 | [-30.3; -26.4] |
| <b>Suriname</b>                      | 4.0  | [2.4; 5.6]   | 1.0  | [0.0; 2.6]   | 2.8  | [0.0; 6.0]   | 2.3  | [0.0; 5.5]   | 2.5  | [0.0; 5.6]  | -3.5  | [-3.7; -3.3]   | -19.3 | [-19.9; -18.7] |
| <b>Trinidad and Tobago</b>           | 3.0  | [0.0; 6.3]   | 3.9  | [0.0; 8.3]   | 2.7  | [0.0; 5.8]   | 3.2  | [0.0; 7.9]   | 1.7  | [0.0; 5.0]  | -1.0  | [-1.2; -0.8]   | -3.8  | [-4.4; -3.2]   |
| <b>Uruguay</b>                       | 3.6  | [0.0; 8.9]   | 1.9  | [0.0; 4.6]   | 0.0  | -            | 0.0  | -            | 0.6  | [0.0; 1.7]  | -6.2  | [-6.4; -5.9]   | -26.5 | [-27.3; -25.7] |

Note: <sup>1</sup> Slope Index of Inequality; <sup>2</sup> Concentration Index

Table S5. Prevalence of suspected developmental delay in each studied country for the literacy-numeracy domain; countries grouped by world region. Source: MICS and DHS surveys, 2010-2016

| Country                               | Wealth quintile (%) |              |      |              |      |              |      |              | Measures of inequality |              |                 |                |                  |                |
|---------------------------------------|---------------------|--------------|------|--------------|------|--------------|------|--------------|------------------------|--------------|-----------------|----------------|------------------|----------------|
|                                       | Poorest             | IC95%        | Q2   | IC95%        | Q3   | IC95%        | Q4   | IC95%        | Richest                | IC95%        | SH <sup>1</sup> | IC95%          | CIX <sup>2</sup> | IC95%          |
| <b>West &amp; Central Africa</b>      |                     |              |      |              |      |              |      |              |                        |              |                 |                |                  |                |
| Benin                                 | 99.0                | [98.3; 99.8] | 98.1 | [97.0; 99.3] | 95.9 | [94.4; 97.5] | 91.1 | [88.6; 93.6] | 74.6                   | [70.5; 78.8] | -37.9           | [-39.0; -36.8] | -6.4             | [-6.7; -6.1]   |
| Cameroon                              | 98.6                | [97.4; 99.8] | 91.1 | [88.6; 93.6] | 84.6 | [80.4; 88.9] | 73.5 | [68.3; 78.7] | 58.8                   | [53.1; 64.4] | -44.0           | [-45.4; -42.5] | -8.3             | [-8.7; -7.9]   |
| CAR                                   | 98.6                | [97.8; 99.4] | 97.2 | [95.7; 98.6] | 93.5 | [90.9; 96.0] | 93.3 | [91.2; 95.5] | 77.5                   | [71.9; 83.2] | -18.3           | [-19.0; -17.5] | -2.3             | [-2.5; -2.1]   |
| Chad                                  | 96.8                | [95.3; 98.3] | 96.4 | [94.9; 97.9] | 95.3 | [93.6; 97.1] | 95.4 | [93.5; 97.3] | 87.2                   | [83.6; 90.8] | -9.2            | [-9.4; -8.9]   | -1.4             | [-1.5; -1.3]   |
| Congo Brazzaville                     | 95.3                | [93.8; 96.7] | 90.9 | [88.0; 93.9] | 85.9 | [82.2; 89.6] | 76.9 | [71.7; 82.2] | 78.0                   | [72.4; 83.7] | -22.8           | [-23.8; -21.9] | -3.9             | [-4.1; -3.8]   |
| Congo DR                              | 89.2                | [84.7; 93.6] | 92.8 | [90.0; 95.6] | 91.4 | [88.1; 94.7] | 89.9 | [86.1; 93.7] | 81.1                   | [75.2; 87.0] | -3.1            | [-3.3; -2.9]   | -0.7             | [-0.7; -0.6]   |
| Côte D'Ivoire                         | 99.1                | [98.4; 99.7] | 98.0 | [96.7; 99.4] | 97.5 | [96.3; 98.8] | 89.9 | [86.2; 93.6] | 67.2                   | [59.0; 75.4] | -27.9           | [-29.1; -26.7] | -3.7             | [-4.0; -3.5]   |
| Gambia                                | 92.6                | [90.0; 95.2] | 89.6 | [85.6; 93.5] | 89.8 | [86.2; 93.4] | 89.8 | [86.0; 93.7] | 73.5                   | [66.6; 80.4] | -13.6           | [-14.5; -12.8] | -3.1             | [-3.3; -2.9]   |
| Ghana                                 | 93.0                | [91.1; 94.9] | 81.1 | [75.9; 86.2] | 73.4 | [68.1; 78.7] | 60.0 | [52.5; 67.6] | 37.5                   | [29.7; 45.4] | -50.5           | [-51.9; -49.1] | -10.0            | [-10.4; -9.6]  |
| Guinea                                | 99.1                | [98.4; 99.8] | 99.2 | [98.6; 99.9] | 97.6 | [96.1; 99.1] | 91.3 | [88.5; 94.2] | 78.7                   | [73.2; 84.2] | -27.2           | [-28.5; -26.0] | -3.6             | [-3.9; -3.4]   |
| Guinea Bissau                         | 98.9                | [98.3; 99.5] | 97.2 | [95.2; 99.1] | 97.5 | [96.1; 98.9] | 87.7 | [83.0; 92.5] | 73.0                   | [65.9; 80.1] | -24.8           | [-26.2; -23.3] | -2.8             | [-3.0; -2.5]   |
| Mali                                  | 98.6                | [97.8; 99.4] | 94.9 | [93.1; 96.6] | 91.6 | [88.8; 94.4] | 90.8 | [88.2; 93.4] | 79.4                   | [76.4; 82.4] | -22.1           | [-22.4; -21.8] | -3.5             | [-3.6; -3.4]   |
| Mauritania                            | 78.8                | [75.1; 82.4] | 77.7 | [73.5; 81.9] | 71.2 | [66.9; 75.4] | 71.5 | [66.6; 76.4] | 59.6                   | [54.1; 65.2] | -20.7           | [-21.5; -19.8] | -4.9             | [-5.1; -4.7]   |
| Nigeria                               | 95.7                | [94.7; 96.6] | 90.1 | [88.6; 91.5] | 75.6 | [72.5; 78.7] | 50.9 | [47.0; 54.9] | 26.2                   | [22.9; 29.5] | -77.3           | [-77.6; -77.0] | -19.3            | [-19.5; -19.1] |
| S Tome and Principe                   | 88.2                | [83.7; 92.6] | 84.6 | [77.7; 91.6] | 83.5 | [77.6; 89.4] | 84.2 | [77.5; 91.0] | 79.5                   | [70.3; 88.7] | -7.7            | [-9.3; -6.0]   | -2.1             | [-2.4; -1.8]   |
| Sierra Leone                          | 96.3                | [94.6; 98.0] | 95.7 | [93.9; 97.6] | 91.4 | [89.1; 93.8] | 90.9 | [88.1; 93.7] | 70.2                   | [64.2; 76.1] | -26.1           | [-27.1; -25.1] | -4.6             | [-4.8; -4.3]   |
| Togo                                  | 98.1                | [97.3; 99.0] | 98.0 | [96.8; 99.2] | 96.8 | [95.1; 98.5] | 86.7 | [82.2; 91.2] | 79.1                   | [74.4; 83.9] | -25.3           | [-26.5; -24.1] | -3.1             | [-3.4; -2.9]   |
| <b>Eastern &amp; Southern Africa</b>  |                     |              |      |              |      |              |      |              |                        |              |                 |                |                  |                |
| Burundi                               | 95.9                | [94.6; 97.1] | 94.7 | [93.1; 96.3] | 94.1 | [92.3; 96.0] | 91.3 | [89.0; 93.6] | 77.1                   | [73.6; 80.7] | -22.1           | [-22.7; -21.5] | -4.4             | [-4.6; -4.1]   |
| Eswatini                              | 94.1                | [91.4; 96.8] | 86.5 | [81.9; 91.0] | 86.5 | [80.8; 92.2] | 79.3 | [72.1; 86.5] | 58.3                   | [48.9; 67.7] | -31.9           | [-34.3; -29.4] | -6.7             | [-7.2; -6.2]   |
| Malawi                                | 91.4                | [89.6; 93.3] | 90.3 | [88.3; 92.3] | 84.1 | [81.7; 86.4] | 79.0 | [76.1; 81.9] | 63.5                   | [59.6; 67.4] | -30.4           | [-30.9; -29.9] | -5.4             | [-5.6; -5.2]   |
| Rwanda                                | 94.4                | [92.1; 96.7] | 95.1 | [93.3; 96.9] | 95.4 | [93.6; 97.3] | 94.6 | [92.2; 96.9] | 81.6                   | [77.3; 85.9] | -11.7           | [-12.3; -11.0] | -2.6             | [-2.8; -2.4]   |
| Uganda                                | 87.1                | [84.4; 89.8] | 81.6 | [78.8; 84.4] | 72.3 | [68.9; 75.8] | 64.5 | [60.3; 68.6] | 43.3                   | [38.4; 48.1] | -46.3           | [-47.0; -45.5] | -9.9             | [-10.2; -9.6]  |
| Zimbabwe                              | 95.1                | [93.5; 96.6] | 95.1 | [93.7; 96.6] | 91.7 | [89.7; 93.8] | 89.0 | [86.6; 91.5] | 83.2                   | [79.7; 86.6] | -15.0           | [-15.8; -14.1] | -2.7             | [-2.8; -2.5]   |
| <b>Middle East &amp; North Africa</b> |                     |              |      |              |      |              |      |              |                        |              |                 |                |                  |                |
| Algeria                               | 81.3                | [77.7; 84.9] | 76.9 | [73.1; 80.6] | 70.0 | [66.2; 73.8] | 66.6 | [62.7; 70.6] | 58.7                   | [53.6; 63.8] | -26.3           | [-27.1; -25.5] | -6.5             | [-6.7; -6.3]   |
| Iraq                                  | 91.6                | [90.2; 93.0] | 87.8 | [85.6; 89.9] | 82.5 | [79.9; 85.1] | 74.5 | [70.9; 78.1] | 64.1                   | [59.1; 69.2] | -27.3           | [-27.7; -26.9] | -5.6             | [-5.7; -5.6]   |
| Jordan                                | 89.9                | [86.3; 93.4] | 87.7 | [84.5; 91.0] | 85.4 | [81.1; 89.6] | 80.8 | [74.9; 86.7] | 67.4                   | [59.0; 75.8] | -18.1           | [-19.2; -17.0] | -3.8             | [-4.0; -3.6]   |
| State of Palestine                    | 85.1                | [82.3; 87.9] | 80.4 | [77.1; 83.6] | 83.0 | [79.6; 86.3] | 80.6 | [77.2; 83.9] | 74.6                   | [70.3; 78.8] | -11.2           | [-13.2; -9.2]  | -2.5             | [-2.9; -2.1]   |
| Tunisia                               | 84.4                | [78.2; 90.6] | 69.3 | [62.4; 76.2] | 65.4 | [57.0; 73.8] | 62.7 | [54.6; 70.8] | 53.6                   | [44.3; 62.9] | -31.8           | [-34.3; -29.4] | -7.3             | [-8.0; -6.7]   |
| <b>Europe &amp; Central Asia</b>      |                     |              |      |              |      |              |      |              |                        |              |                 |                |                  |                |
| Belarus                               | 67.9                | [57.6; 78.1] | 65.5 | [57.6; 73.4] | 50.0 | [41.1; 59.0] | 45.1 | [37.1; 53.2] | 41.4                   | [34.4; 48.3] | -31.4           | [-34.4; -28.5] | -9.9             | [-10.9; -8.9]  |

|                                      |      |              |      |              |      |              |      |              |      |              |       |                |       |                |
|--------------------------------------|------|--------------|------|--------------|------|--------------|------|--------------|------|--------------|-------|----------------|-------|----------------|
| <b>Bosnia and Herzegovina</b>        | 83.2 | [77.5; 88.9] | 74.2 | [65.5; 82.9] | 79.0 | [73.1; 84.9] | 70.4 | [58.4; 82.3] | 68.9 | [61.5; 76.3] | -15.0 | [-16.9; -13.0] | -3.6  | [-4.0; -3.1]   |
| <b>Kazakhstan</b>                    | 79.3 | [73.1; 85.4] | 77.8 | [71.5; 84.2] | 74.9 | [67.6; 82.3] | 66.7 | [60.8; 72.5] | 62.8 | [57.0; 68.6] | -19.6 | [-21.6; -17.7] | -5.0  | [-5.5; -4.6]   |
| <b>Kosovo</b>                        | 87.1 | [82.4; 91.9] | 89.8 | [84.5; 95.1] | 90.0 | [84.6; 95.4] | 76.7 | [68.5; 84.9] | 67.2 | [54.7; 79.8] | -24.2 | [-26.8; -21.6] | -5.1  | [-5.5; -4.6]   |
| <b>Kyrgyzstan</b>                    | 94.1 | [91.7; 96.5] | 92.5 | [89.1; 95.9] | 86.8 | [82.6; 91.1] | 82.2 | [77.0; 87.3] | 66.7 | [58.8; 74.6] | -28.5 | [-30.0; -26.9] | -4.1  | [-4.5; -3.7]   |
| <b>Macedonia</b>                     | 66.0 | [51.3; 80.8] | 55.1 | [44.4; 65.8] | 54.7 | [44.6; 64.9] | 50.0 | [39.1; 61.0] | 57.9 | [46.6; 69.3] | -9.6  | [-13.4; -5.9]  | -4.4  | [-5.4; -3.4]   |
| <b>Moldova</b>                       | 85.0 | [78.0; 91.9] | 77.5 | [69.6; 85.3] | 73.3 | [65.2; 81.4] | 63.0 | [53.3; 72.7] | 54.4 | [46.4; 62.5] | -33.1 | [-37.5; -28.8] | -8.5  | [-9.7; -7.4]   |
| <b>Montenegro</b>                    | 87.5 | [81.0; 93.9] | 84.5 | [75.9; 93.1] | 71.1 | [59.2; 83.0] | 71.9 | [61.5; 82.4] | 78.7 | [70.6; 86.9] | -14.9 | [-18.1; -11.6] | -3.9  | [-4.6; -3.2]   |
| <b>Turkmenistan</b>                  | 89.5 | [85.0; 94.0] | 86.8 | [81.8; 91.8] | 75.7 | [68.9; 82.5] | 80.3 | [74.7; 85.9] | 79.1 | [73.6; 84.6] | -13.3 | [-15.3; -11.4] | -1.9  | [-2.3; -1.5]   |
| <b>Ukraine</b>                       | 68.5 | [60.5; 76.6] | 60.9 | [52.7; 69.1] | 54.4 | [43.7; 65.1] | 45.1 | [36.0; 54.2] | 43.4 | [34.4; 52.5] | -30.4 | [-32.9; -27.9] | -9.6  | [-10.4; -8.8]  |
| <b>South Asia</b>                    |      |              |      |              |      |              |      |              |      |              |       |                |       |                |
| <b>Bangladesh</b>                    | 90.1 | [88.7; 91.6] | 86.3 | [84.5; 88.2] | 81.8 | [79.3; 84.2] | 76.1 | [73.1; 79.0] | 56.2 | [51.9; 60.5] | -32.2 | [-33.0; -31.3] | -6.0  | [-6.2; -5.8]   |
| <b>Bhutan</b>                        | 87.4 | [83.3; 91.4] | 85.0 | [80.9; 89.1] | 81.8 | [76.9; 86.6] | 72.5 | [66.9; 78.1] | 47.7 | [41.4; 54.1] | -40.3 | [-41.6; -38.9] | -9.5  | [-9.8; -9.1]   |
| <b>Nepal</b>                         | 89.6 | [86.7; 92.5] | 82.5 | [77.8; 87.1] | 79.1 | [72.7; 85.4] | 60.6 | [52.8; 68.3] | 31.9 | [24.8; 39.1] | -52.5 | [-54.2; -50.9] | -12.2 | [-12.7; -11.6] |
| <b>East Asia &amp; the Pacific</b>   |      |              |      |              |      |              |      |              |      |              |       |                |       |                |
| <b>Cambodia</b>                      | 82.0 | [77.5; 86.5] | 78.3 | [73.1; 83.5] | 76.5 | [71.4; 81.7] | 68.7 | [63.0; 74.4] | 54.7 | [49.4; 60.0] | -34.2 | [-35.2; -33.2] | -8.1  | [-8.4; -7.9]   |
| <b>Lao</b>                           | 93.5 | [91.6; 95.5] | 91.6 | [89.7; 93.5] | 82.3 | [79.1; 85.6] | 69.2 | [65.0; 73.3] | 43.4 | [38.1; 48.6] | -48.0 | [-48.9; -47.1] | -9.1  | [-9.4; -8.8]   |
| <b>Mongolia</b>                      | 93.8 | [91.7; 95.9] | 94.3 | [92.1; 96.4] | 90.8 | [88.2; 93.5] | 89.9 | [86.8; 93.0] | 87.7 | [84.0; 91.3] | -8.4  | [-9.2; -7.6]   | -1.5  | [-1.6; -1.3]   |
| <b>Thailand</b>                      | 40.4 | [33.6; 47.2] | 30.4 | [24.9; 35.9] | 22.9 | [18.1; 27.6] | 25.3 | [19.3; 31.3] | 17.3 | [11.8; 22.7] | -24.7 | [-25.8; -23.7] | -15.4 | [-15.9; -14.8] |
| <b>Vietnam</b>                       | 83.0 | [77.1; 89.0] | 73.5 | [65.7; 81.2] | 67.5 | [60.1; 74.9] | 67.2 | [60.2; 74.1] | 66.5 | [59.2; 73.9] | -21.6 | [-23.8; -19.5] | -5.8  | [-6.3; -5.3]   |
| <b>Latin America &amp; Caribbean</b> |      |              |      |              |      |              |      |              |      |              |       |                |       |                |
| <b>Argentina</b>                     | 68.2 | [62.8; 73.6] | 60.3 | [54.3; 66.3] | 52.2 | [46.3; 58.1] | 53.2 | [46.7; 59.7] | 51.1 | [44.5; 57.7] | -20.3 | [-21.8; -18.9] | -6.0  | [-6.4; -5.6]   |
| <b>Belize</b>                        | 57.3 | [47.5; 67.0] | 53.8 | [45.4; 62.3] | 44.1 | [35.8; 52.4] | 38.9 | [30.3; 47.6] | 25.8 | [16.7; 34.8] | -33.5 | [-36.2; -30.7] | -10.3 | [-11.4; -9.3]  |
| <b>Costa Rica</b>                    | 80.7 | [73.1; 88.3] | 83.9 | [76.6; 91.2] | 69.1 | [50.9; 87.2] | 62.3 | [46.1; 78.6] | 68.7 | [53.9; 83.5] | -23.0 | [-26.0; -20.0] | -4.8  | [-5.4; -4.1]   |
| <b>Dominican Republic</b>            | 90.2 | [87.9; 92.6] | 84.0 | [81.5; 86.5] | 81.1 | [78.4; 83.7] | 74.2 | [70.1; 78.2] | 61.0 | [56.1; 65.9] | -30.6 | [-31.3; -29.8] | -6.7  | [-6.9; -6.5]   |
| <b>El Salvador</b>                   | 88.8 | [85.8; 91.9] | 87.2 | [83.6; 90.9] | 83.7 | [80.0; 87.3] | 77.3 | [72.8; 81.9] | 65.6 | [58.8; 72.4] | -26.7 | [-27.6; -25.9] | -5.7  | [-5.8; -5.5]   |
| <b>Guyana</b>                        | 48.4 | [42.8; 54.0] | 33.6 | [26.0; 41.3] | 22.2 | [16.6; 27.8] | 25.7 | [18.7; 32.7] | 24.6 | [16.9; 32.2] | -34.2 | [-37.6; -30.9] | -13.4 | [-14.9; -12.0] |
| <b>Jamaica</b>                       | 50.8 | [40.9; 60.8] | 31.3 | [22.9; 39.6] | 25.2 | [17.0; 33.5] | 25.6 | [16.6; 34.7] | 30.6 | [9.5; 51.6]  | -27.1 | [-30.5; -23.7] | -13.9 | [-15.2; -12.6] |
| <b>Mexico</b>                        | 86.3 | [82.0; 90.6] | 77.0 | [71.8; 82.3] | 74.5 | [68.6; 80.4] | 70.0 | [61.2; 78.8] | 81.6 | [65.4; 97.7] | -16.0 | [-17.3; -14.8] | -3.0  | [-3.2; -2.8]   |
| <b>Panama</b>                        | 88.1 | [83.5; 92.7] | 87.3 | [82.1; 92.5] | 81.0 | [74.2; 87.8] | 74.3 | [64.4; 84.3] | 64.2 | [53.8; 74.6] | -20.8 | [-22.0; -19.7] | -4.9  | [-5.1; -4.7]   |
| <b>Paraguay</b>                      | 93.4 | [91.1; 95.8] | 81.2 | [74.9; 87.4] | 77.3 | [70.0; 84.6] | 70.3 | [63.5; 77.0] | 56.0 | [47.6; 64.4] | -41.6 | [-43.0; -40.2] | -9.3  | [-9.6; -8.9]   |
| <b>Suriname</b>                      | 91.7 | [88.8; 94.5] | 78.6 | [71.5; 85.8] | 72.8 | [64.2; 81.5] | 69.5 | [60.0; 79.1] | 62.6 | [52.9; 72.3] | -34.7 | [-36.0; -33.4] | -6.9  | [-7.1; -6.6]   |
| <b>Trinidad and Tobago</b>           | 27.1 | [17.6; 36.5] | 18.0 | [8.6; 27.4]  | 14.4 | [8.7; 20.2]  | 13.0 | [5.9; 20.0]  | 7.5  | [1.7; 13.4]  | -21.3 | [-25.0; -17.6] | -18.9 | [-21.6; -16.2] |
| <b>Uruguay</b>                       | 59.1 | [40.2; 78.0] | 45.0 | [28.6; 61.4] | 40.0 | [21.8; 58.3] | 59.3 | [44.1; 74.4] | 37.6 | [28.5; 46.6] | -21.9 | [-25.7; -18.0] | -8.3  | [-9.5; -7.0]   |

Note: <sup>1</sup> Slope Index of Inequality; <sup>2</sup> Concentration Index

Table S6. Prevalence of suspected developmental delay in each studied country for the combined indicator (ECDI); countries grouped by world region. Source: MICS and DHS surveys, 2010-2016.

| Country                               | Wealth quintile (%) |              |      |              |      |              |      |              | Measures of inequality |              |                 |                |                  |                |
|---------------------------------------|---------------------|--------------|------|--------------|------|--------------|------|--------------|------------------------|--------------|-----------------|----------------|------------------|----------------|
|                                       | Poorest             | IC95%        | Q2   | IC95%        | Q3   | IC95%        | Q4   | IC95%        | Richest                | IC95%        | SH <sup>1</sup> | IC95%          | CIX <sup>2</sup> | IC95%          |
| <b>West &amp; Central Africa</b>      |                     |              |      |              |      |              |      |              |                        |              |                 |                |                  |                |
| Benin                                 | 41.1                | [37.1; 45.2] | 40.2 | [35.8; 44.6] | 39.5 | [35.2; 43.7] | 39.1 | [34.7; 43.5] | 27.5                   | [24.0; 31.0] | -16.2           | [-16.8; -15.6] | -7.9             | [-8.2; -7.7]   |
| Cameroon                              | 41.7                | [36.8; 46.5] | 38.9 | [34.3; 43.6] | 43.3 | [38.0; 48.5] | 29.3 | [24.8; 33.9] | 24.6                   | [19.8; 29.4] | -20.1           | [-21.1; -19.0] | -9.3             | [-9.7; -8.8]   |
| CAR                                   | 54.2                | [49.1; 59.3] | 54.5 | [50.4; 58.7] | 50.0 | [44.9; 55.2] | 51.0 | [45.0; 57.0] | 47.9                   | [41.9; 53.9] | -7.5            | [-8.0; -7.1]   | -1.8             | [-1.9; -1.6]   |
| Chad                                  | 64.6                | [60.1; 69.2] | 71.5 | [67.3; 75.7] | 71.0 | [66.5; 75.5] | 69.7 | [65.1; 74.3] | 57.2                   | [52.5; 62.0] | -6.9            | [-7.5; -6.2]   | -2.5             | [-2.6; -2.4]   |
| Congo Brazzaville                     | 53.9                | [50.4; 57.5] | 43.2 | [37.2; 49.2] | 31.1 | [25.7; 36.5] | 34.4 | [28.0; 40.8] | 27.3                   | [21.5; 33.1] | -34.1           | [-34.8; -33.3] | -11.6            | [-11.9; -11.4] |
| Congo DR                              | 39.2                | [32.6; 45.9] | 41.5 | [35.5; 47.5] | 35.3 | [28.2; 42.3] | 27.9 | [20.2; 35.7] | 22.5                   | [17.5; 27.4] | -12.8           | [-13.1; -12.5] | -2.8             | [-2.9; -2.7]   |
| Côte D'Ivoire                         | 36.4                | [32.2; 40.6] | 38.9 | [34.0; 43.8] | 38.9 | [34.4; 43.4] | 36.7 | [30.1; 43.2] | 27.3                   | [20.0; 34.6] | -4.2            | [-4.9; -3.6]   | -3.8             | [-4.0; -3.6]   |
| Gambia                                | 33.0                | [29.5; 36.4] | 28.4 | [23.8; 33.0] | 34.8 | [30.2; 39.4] | 29.9 | [24.9; 34.9] | 24.4                   | [19.1; 29.7] | -6.3            | [-6.9; -5.7]   | -4.3             | [-4.6; -4.1]   |
| Ghana                                 | 29.7                | [25.5; 33.9] | 27.1 | [22.1; 32.1] | 28.5 | [22.1; 35.0] | 21.3 | [15.7; 26.8] | 14.3                   | [9.1; 19.6]  | -14.2           | [-15.2; -13.2] | -10.5            | [-10.9; -10.0] |
| Guinea                                | 54.1                | [49.4; 58.9] | 49.6 | [44.8; 54.4] | 53.2 | [48.1; 58.4] | 47.0 | [42.0; 52.1] | 47.7                   | [41.1; 54.4] | -7.6            | [-8.2; -7.0]   | -2.8             | [-3.0; -2.6]   |
| Guinea Bissau                         | 31.8                | [27.2; 36.5] | 37.3 | [32.5; 42.1] | 40.6 | [35.3; 45.9] | 40.5 | [34.3; 46.7] | 40.0                   | [31.9; 48.0] | 12.1            | [11.3; 12.9]   | 1.3              | [0.9; 1.6]     |
| Mali                                  | 44.2                | [40.1; 48.3] | 36.9 | [33.0; 40.9] | 34.3 | [30.7; 37.9] | 36.8 | [33.1; 40.5] | 32.4                   | [29.0; 35.8] | -12.9           | [-13.4; -12.5] | -5.1             | [-5.3; -5.0]   |
| Mauritania                            | 46.0                | [41.2; 50.8] | 41.5 | [37.5; 45.4] | 37.1 | [32.5; 41.6] | 33.3 | [28.6; 38.0] | 31.1                   | [26.0; 36.1] | -19.4           | [-20.1; -18.7] | -8.4             | [-8.7; -8.2]   |
| Nigeria                               | 52.1                | [49.1; 55.0] | 49.3 | [46.4; 52.3] | 40.7 | [36.2; 45.3] | 26.4 | [23.3; 29.4] | 14.1                   | [12.1; 16.0] | -46.8           | [-47.2; -46.3] | -21.1            | [-21.2; -20.9] |
| S Tome and Principe                   | 48.5                | [40.9; 56.1] | 43.3 | [34.6; 52.0] | 47.0 | [37.5; 56.6] | 46.0 | [35.5; 56.6] | 37.4                   | [26.5; 48.3] | -6.5            | [-8.3; -4.7]   | -4.4             | [-5.0; -3.7]   |
| Sierra Leone                          | 60.7                | [55.7; 65.6] | 56.7 | [52.3; 61.2] | 53.5 | [48.1; 58.9] | 52.5 | [47.7; 57.4] | 40.9                   | [35.0; 46.8] | -20.2           | [-20.8; -19.7] | -6.7             | [-6.9; -6.5]   |
| Togo                                  | 53.4                | [47.9; 58.8] | 43.6 | [37.4; 49.8] | 47.9 | [42.0; 53.7] | 41.4 | [35.4; 47.4] | 37.9                   | [31.4; 44.5] | -18.5           | [-19.1; -17.8] | -5.2             | [-5.5; -4.9]   |
| <b>Eastern &amp; Southern Africa</b>  |                     |              |      |              |      |              |      |              |                        |              |                 |                |                  |                |
| Burundi                               | 64.4                | [60.8; 67.9] | 63.3 | [59.8; 66.8] | 59.6 | [56.1; 63.2] | 59.7 | [55.3; 64.1] | 46.2                   | [41.7; 50.7] | -19.9           | [-20.6; -19.3] | -6.8             | [-7.0; -6.5]   |
| Eswatini                              | 37.3                | [31.3; 43.4] | 36.7 | [29.7; 43.6] | 36.3 | [29.0; 43.6] | 31.4 | [23.2; 39.5] | 22.9                   | [14.9; 30.8] | -12.6           | [-14.8; -10.5] | -7.6             | [-8.6; -6.7]   |
| Malawi                                | 47.1                | [43.6; 50.7] | 41.8 | [38.5; 45.0] | 39.2 | [35.8; 42.6] | 35.9 | [32.8; 38.9] | 28.7                   | [24.8; 32.7] | -20.2           | [-20.7; -19.6] | -7.5             | [-7.8; -7.3]   |
| Rwanda                                | 34.7                | [30.2; 39.2] | 32.3 | [28.1; 36.6] | 27.0 | [22.8; 31.2] | 25.0 | [20.7; 29.4] | 18.4                   | [13.6; 23.1] | -20.0           | [-20.6; -19.5] | -10.4            | [-10.8; -10.0] |
| Uganda                                | 43.4                | [39.9; 46.9] | 41.2 | [37.5; 44.8] | 34.7 | [31.1; 38.2] | 33.1 | [29.1; 37.0] | 18.3                   | [15.0; 21.7] | -26.8           | [-27.4; -26.3] | -13.1            | [-13.3; -12.8] |
| Zimbabwe                              | 37.9                | [34.1; 41.7] | 38.7 | [34.9; 42.5] | 35.5 | [31.5; 39.4] | 37.6 | [33.7; 41.5] | 33.3                   | [29.2; 37.5] | -4.8            | [-5.6; -4.1]   | -1.7             | [-2.0; -1.4]   |
| <b>Middle East &amp; North Africa</b> |                     |              |      |              |      |              |      |              |                        |              |                 |                |                  |                |
| Algeria                               | 28.5                | [24.7; 32.2] | 31.1 | [27.4; 34.8] | 29.4 | [26.0; 32.9] | 29.6 | [25.7; 33.5] | 27.4                   | [23.2; 31.6] | -1.5            | [-1.9; -1.1]   | -1.8             | [-2.0; -1.6]   |
| Iraq                                  | 33.1                | [30.7; 35.5] | 30.4 | [27.5; 33.2] | 27.6 | [24.7; 30.4] | 23.7 | [20.7; 26.7] | 18.9                   | [15.4; 22.4] | -15.4           | [-15.7; -15.1] | -9.3             | [-9.4; -9.1]   |
| Jordan                                | 38.0                | [32.8; 43.1] | 34.1 | [28.9; 39.4] | 25.5 | [20.0; 30.9] | 27.4 | [21.6; 33.2] | 24.3                   | [16.5; 32.1] | -17.9           | [-18.3; -17.5] | -8.5             | [-8.7; -8.2]   |
| State of Palestine                    | 35.1                | [31.5; 38.7] | 28.5 | [25.1; 31.9] | 25.8 | [22.2; 29.4] | 22.1 | [18.8; 25.5] | 16.8                   | [13.6; 20.0] | -22.0           | [-23.0; -21.1] | -13.1            | [-13.7; -12.5] |
| Tunisia                               | 31.2                | [24.6; 37.9] | 20.2 | [14.6; 25.7] | 19.9 | [13.0; 26.7] | 23.1 | [16.3; 29.8] | 15.1                   | [9.0; 21.3]  | -16.0           | [-17.7; -14.2] | -10.5            | [-11.5; -9.4]  |
| <b>Europe &amp; Central Asia</b>      |                     |              |      |              |      |              |      |              |                        |              |                 |                |                  |                |
| Belarus                               | 6.8                 | [2.4; 11.3]  | 6.0  | [2.2; 9.8]   | 6.2  | [2.4; 10.0]  | 4.4  | [2.1; 6.7]   | 4.5                    | [2.2; 6.9]   | -3.1            | [-3.6; -2.7]   | -10.1            | [-11.3; -8.8]  |



|                                      |      |              |      |              |      |              |      |              |      |              |       |                |       |                |
|--------------------------------------|------|--------------|------|--------------|------|--------------|------|--------------|------|--------------|-------|----------------|-------|----------------|
| <b>Bosnia and Herzegovina</b>        | 4.5  | [1.5; 7.4]   | 1.9  | [0.0; 4.0]   | 3.4  | [1.1; 5.7]   | 1.5  | [0.0; 3.0]   | 5.2  | [0.0; 11.1]  | 1.2   | [0.7; 1.6]     | -9.2  | [-10.2; -8.2]  |
| <b>Kazakhstan</b>                    | 11.7 | [8.0; 15.4]  | 15.9 | [8.8; 23.0]  | 15.4 | [10.5; 20.2] | 11.2 | [7.6; 14.7]  | 10.8 | [7.0; 14.6]  | -2.8  | [-3.6; -2.0]   | -5.3  | [-6.2; -4.5]   |
| <b>Kosovo</b>                        | 16.6 | [10.9; 22.3] | 22.2 | [14.8; 29.6] | 21.0 | [14.2; 27.7] | 9.0  | [3.9; 14.1]  | 10.4 | [4.9; 16.0]  | -11.7 | [-13.3; -10.2] | -8.8  | [-10.2; -7.4]  |
| <b>Kyrgyzstan</b>                    | 21.0 | [15.9; 26.1] | 18.3 | [13.4; 23.3] | 24.5 | [19.1; 29.8] | 19.1 | [13.4; 24.8] | 14.1 | [9.4; 18.8]  | -4.4  | [-5.7; -3.1]   | -4.9  | [-5.9; -4.0]   |
| <b>Macedonia</b>                     | 8.5  | [1.4; 15.7]  | 8.4  | [3.4; 13.3]  | 8.9  | [3.0; 14.8]  | 5.2  | [1.6; 8.9]   | 3.3  | [0.2; 6.4]   | -7.3  | [-8.2; -6.5]   | -12.6 | [-14.5; -10.7] |
| <b>Moldova</b>                       | 24.6 | [15.7; 33.5] | 10.0 | [4.4; 15.6]  | 15.7 | [8.6; 22.9]  | 13.2 | [6.8; 19.6]  | 12.1 | [8.0; 16.3]  | -8.4  | [-10.2; -6.5]  | -13.5 | [-14.9; -12.2] |
| <b>Montenegro</b>                    | 4.1  | [0.4; 7.7]   | 6.8  | [1.9; 11.6]  | 1.6  | [0.0; 3.9]   | 7.4  | [0.5; 14.2]  | 2.2  | [0.0; 4.6]   | -2.0  | [-3.1; -0.8]   | -3.2  | [-6.5; 0.0]    |
| <b>Turkmenistan</b>                  | 11.5 | [8.1; 14.9]  | 8.6  | [5.0; 12.1]  | 5.0  | [1.7; 8.4]   | 5.7  | [2.6; 8.8]   | 6.8  | [3.6; 9.9]   | -6.3  | [-7.3; -5.3]   | -9.9  | [-11.4; -8.5]  |
| <b>Ukraine</b>                       | 10.8 | [7.3; 14.4]  | 9.0  | [5.1; 13.0]  | 11.5 | [6.9; 16.2]  | 7.6  | [4.5; 10.7]  | 7.6  | [4.0; 11.3]  | -4.7  | [-5.6; -3.8]   | -6.7  | [-8.0; -5.4]   |
| <b>South Asia</b>                    |      |              |      |              |      |              |      |              |      |              |       |                |       |                |
| <b>Bangladesh</b>                    | 42.9 | [40.4; 45.3] | 38.7 | [36.1; 41.3] | 35.3 | [32.2; 38.4] | 33.7 | [30.5; 36.8] | 21.9 | [18.6; 25.2] | -21.0 | [-21.5; -20.4] | -9.6  | [-9.8; -9.3]   |
| <b>Bhutan</b>                        | 31.5 | [25.5; 37.4] | 28.6 | [24.2; 33.0] | 27.4 | [22.5; 32.4] | 29.0 | [22.4; 35.6] | 19.5 | [14.6; 24.4] | -11.5 | [-12.3; -10.7] | -8.2  | [-8.6; -7.7]   |
| <b>Nepal</b>                         | 39.8 | [35.2; 44.4] | 43.5 | [37.0; 50.0] | 42.0 | [33.8; 50.2] | 29.8 | [23.9; 35.7] | 13.1 | [7.6; 18.5]  | -23.0 | [-24.4; -21.6] | -14.2 | [-14.6; -13.8] |
| <b>East Asia &amp; the Pacific</b>   |      |              |      |              |      |              |      |              |      |              |       |                |       |                |
| <b>Cambodia</b>                      | 32.7 | [28.4; 37.0] | 27.3 | [22.8; 31.8] | 25.0 | [20.2; 29.8] | 27.8 | [22.5; 33.2] | 18.3 | [14.0; 22.7] | -16.6 | [-17.1; -16.1] | -12.1 | [-12.4; -11.8] |
| <b>Lao</b>                           | 23.1 | [19.8; 26.4] | 22.0 | [19.0; 24.9] | 17.7 | [14.7; 20.7] | 14.1 | [11.1; 17.1] | 8.8  | [6.1; 11.4]  | -16.4 | [-16.7; -16.1] | -14.9 | [-15.1; -14.7] |
| <b>Mongolia</b>                      | 23.3 | [20.0; 26.6] | 23.9 | [19.6; 28.2] | 20.5 | [16.5; 24.4] | 26.2 | [21.3; 31.0] | 22.1 | [17.7; 26.6] | -0.1  | [-0.8; 0.6]    | 0.9   | [0.4; 1.3]     |
| <b>Thailand</b>                      | 10.0 | [6.6; 13.4]  | 7.1  | [4.4; 9.9]   | 4.9  | [2.8; 7.0]   | 7.3  | [4.1; 10.4]  | 3.0  | [1.3; 4.6]   | -8.0  | [-8.6; -7.4]   | -17.3 | [-18.3; -16.3] |
| <b>Vietnam</b>                       | 16.9 | [11.7; 22.2] | 8.4  | [4.1; 12.7]  | 8.1  | [4.4; 11.7]  | 8.7  | [5.1; 12.3]  | 6.9  | [2.8; 11.1]  | -13.2 | [-14.6; -11.7] | -21.6 | [-23.2; -19.9] |
| <b>Latin America &amp; Caribbean</b> |      |              |      |              |      |              |      |              |      |              |       |                |       |                |
| <b>Argentina</b>                     | 20.1 | [16.1; 24.0] | 14.9 | [10.4; 19.4] | 9.3  | [6.2; 12.4]  | 9.7  | [5.3; 14.1]  | 7.2  | [4.1; 10.3]  | -17.5 | [-18.1; -16.8] | -18.8 | [-19.5; -18.2] |
| <b>Belize</b>                        | 22.3 | [16.5; 28.1] | 17.1 | [11.2; 23.0] | 18.5 | [13.0; 24.0] | 7.8  | [3.3; 12.2]  | 7.5  | [3.2; 11.8]  | -5.9  | [-8.9; -2.9]   | -8.3  | [-12.6; -4.1]  |
| <b>Costa Rica</b>                    | 29.6 | [19.6; 39.7] | 14.2 | [7.4; 20.9]  | 8.8  | [4.4; 13.2]  | 20.4 | [8.3; 32.4]  | 6.5  | [0.6; 12.4]  | -20.6 | [-22.2; -18.9] | -16.3 | [-17.9; -14.7] |
| <b>Dominican Republic</b>            | 21.6 | [18.8; 24.3] | 13.3 | [11.2; 15.3] | 12.7 | [10.2; 15.2] | 11.6 | [8.8; 14.5]  | 11.8 | [8.0; 15.6]  | -27.9 | [-29.6; -26.1] | -20.1 | [-21.1; -19.2] |
| <b>El Salvador</b>                   | 20.3 | [17.0; 23.7] | 21.0 | [17.4; 24.5] | 19.7 | [15.7; 23.7] | 14.3 | [10.4; 18.2] | 13.7 | [9.4; 17.9]  | -13.8 | [-14.3; -13.2] | -13.1 | [-13.6; -12.7] |
| <b>Guyana</b>                        | 18.0 | [14.2; 21.8] | 8.3  | [4.2; 12.4]  | 9.5  | [5.3; 13.7]  | 8.5  | [4.0; 13.1]  | 7.8  | [4.0; 11.6]  | -9.8  | [-10.6; -9.1]  | -9.0  | [-9.7; -8.4]   |
| <b>Jamaica</b>                       | 19.5 | [12.4; 26.7] | 8.9  | [4.2; 13.5]  | 5.1  | [1.1; 9.2]   | 10.5 | [4.1; 16.9]  | 2.8  | [0.0; 6.6]   | -17.6 | [-19.7; -15.6] | -21.8 | [-23.8; -19.7] |
| <b>Mexico</b>                        | 20.1 | [16.3; 23.8] | 18.0 | [14.0; 21.9] | 18.7 | [11.2; 26.2] | 17.1 | [12.2; 21.9] | 9.6  | [4.2; 14.9]  | -18.3 | [-20.3; -16.4] | -25.9 | [-27.8; -24.0] |
| <b>Panama</b>                        | 21.9 | [17.7; 26.1] | 24.4 | [15.5; 33.4] | 24.0 | [15.9; 32.0] | 11.8 | [4.0; 19.6]  | 4.9  | [1.0; 8.8]   | -8.5  | [-9.4; -7.7]   | -6.8  | [-7.5; -6.1]   |
| <b>Paraguay</b>                      | 22.3 | [17.7; 26.9] | 18.0 | [13.0; 22.9] | 21.1 | [15.1; 27.1] | 12.9 | [8.9; 16.9]  | 9.1  | [4.9; 13.3]  | -12.7 | [-13.9; -11.5] | -12.6 | [-13.2; -12.0] |
| <b>Suriname</b>                      | 40.2 | [35.0; 45.4] | 24.5 | [17.6; 31.4] | 18.3 | [11.7; 24.9] | 19.5 | [11.1; 27.9] | 25.1 | [16.1; 34.1] | -15.8 | [-16.7; -14.8] | -15.6 | [-16.4; -14.8] |
| <b>Trinidad and Tobago</b>           | 7.4  | [2.5; 12.2]  | 8.9  | [2.2; 15.6]  | 5.2  | [1.7; 8.7]   | 3.0  | [0.0; 7.0]   | 4.3  | [0.0; 9.1]   | -33.7 | [-34.8; -32.7] | -17.3 | [-17.7; -17.0] |
| <b>Uruguay</b>                       | 20.5 | [5.9; 35.2]  | 8.9  | [0.6; 17.1]  | 4.5  | [1.1; 7.9]   | 17.0 | [0.1; 34.0]  | 3.4  | [0.5; 6.4]   | -6.3  | [-8.2; -4.3]   | -5.4  | [-8.9; -1.8]   |

Note: <sup>1</sup> Slope Index of Inequality; <sup>2</sup> Concentration Index

Table S7. Prevalence of suspected developmental delay in each studied country for the physical domain by urban/rural residence, sex of the child and maternal education; countries grouped by world region. Source: MICS and DHS surveys, 2010-2016.

| Country                               | Year | Area (%) |              |       |              | Sex (%) |              |      |              | Maternal education (%) |              |         |              |             |              |
|---------------------------------------|------|----------|--------------|-------|--------------|---------|--------------|------|--------------|------------------------|--------------|---------|--------------|-------------|--------------|
|                                       |      | Urban    | 95% IC       | Rural | 95% IC       | Female  | 95% IC       | Male | 95% IC       | None                   | 95% IC       | Primary | 95% IC       | Secondary + | 95% IC       |
| <b>West &amp; Central Africa</b>      |      |          |              |       |              |         |              |      |              |                        |              |         |              |             |              |
| Benin                                 | 2014 | 4.4      | [2.9; 6.0]   | 5.2   | [3.7; 6.7]   | 4.9     | [3.5; 6.3]   | 4.8  | [3.5; 6.2]   | 5.0                    | [3.7; 6.2]   | 5.5     | [3.3; 7.6]   | 3.7         | [0.8; 6.6]   |
| Cambodia                              | 2014 | 2.2      | [1.3; 3.2]   | 2.6   | [1.5; 3.7]   | 2.6     | [1.6; 3.5]   | 2.3  | [1.3; 3.4]   | 2.1                    | [1.1; 3.1]   | 2.6     | [1.4; 3.8]   | 2.6         | [1.4; 3.8]   |
| CAR                                   | 2010 | 4.2      | [2.7; 5.8]   | 3.7   | [2.8; 4.7]   | 3.9     | [2.7; 5.0]   | 4.0  | [2.7; 5.3]   | 4.1                    | [2.9; 5.2]   | 3.9     | [2.8; 5.1]   | 3.5         | [0.8; 6.2]   |
| Chad                                  | 2014 | 17.1     | [13.8; 20.4] | 16.3  | [14.4; 18.2] | 17.1    | [14.8; 19.3] | 15.9 | [13.5; 18.2] | 16.7                   | [14.9; 18.6] | 15.8    | [12.7; 19.0] | 15.9        | [10.9; 20.9] |
| Congo Brazzaville                     | 2014 | 1.6      | [0.9; 2.3]   | 4.7   | [3.5; 6.0]   | 3.0     | [2.0; 3.9]   | 2.6  | [1.8; 3.4]   | 2.8                    | [1.3; 4.3]   | 3.5     | [2.2; 4.8]   | 2.7         | [1.7; 3.6]   |
| Congo DR                              | 2013 | 6.6      | [4.4; 8.9]   | 7.2   | [5.4; 9.0]   | 6.5     | [4.7; 8.3]   | 7.6  | [5.6; 9.6]   | 6.2                    | [3.9; 8.6]   | 7.4     | [5.2; 9.7]   | 6.9         | [4.7; 9.2]   |
| Côte D'Ivoire                         | 2016 | 2.3      | [1.2; 3.4]   | 3.7   | [2.5; 4.9]   | 2.9     | [1.8; 4.0]   | 3.4  | [2.1; 4.6]   | 3.2                    | [2.1; 4.3]   | 3.1     | [1.3; 4.9]   | 3.0         | [1.2; 4.8]   |
| Gambia                                | 2010 | 1.7      | [0.7; 2.6]   | 2.4   | [1.6; 3.2]   | 2.1     | [1.3; 2.8]   | 2.1  | [1.3; 2.9]   | 2.3                    | [1.5; 3.0]   | 1.7     | [0.1; 3.2]   | 1.2         | [0.1; 2.3]   |
| Ghana                                 | 2011 | 1.9      | [0.7; 3.0]   | 3.1   | [2.1; 4.2]   | 2.3     | [1.2; 3.4]   | 2.9  | [1.8; 4.0]   | 2.9                    | [1.8; 4.0]   | 2.2     | [0.8; 3.6]   | 2.5         | [1.2; 3.9]   |
| Guinea                                | 2016 | 7.7      | [4.8; 10.5]  | 7.5   | [5.8; 9.1]   | 7.7     | [5.9; 9.5]   | 7.4  | [5.7; 9.1]   | 7.8                    | [6.2; 9.3]   | 5.5     | [2.6; 8.5]   | 8.1         | [3.9; 12.3]  |
| Guinea Bissau                         | 2014 | 12.0     | [7.0; 17.1]  | 9.5   | [7.6; 11.4]  | 10.9    | [7.9; 14.0]  | 10.0 | [7.7; 12.3]  | 11.0                   | [8.6; 13.4]  | 9.4     | [6.2; 12.6]  | 9.9         | [5.0; 14.9]  |
| Mali                                  | 2015 | 4.4      | [3.2; 5.6]   | 4.6   | [3.7; 5.5]   | 4.8     | [3.9; 5.8]   | 4.4  | [3.5; 5.2]   | 4.6                    | [3.8; 5.5]   | 4.2     | [2.6; 5.7]   | 4.7         | [2.5; 6.9]   |
| Mauritania                            | 2015 | 6.9      | [5.3; 8.5]   | 7.9   | [6.2; 9.6]   | 7.3     | [5.7; 9.0]   | 7.6  | [6.0; 9.1]   | 7.5                    | [5.6; 9.4]   | 7.6     | [5.2; 10.0]  | 8.4         | [6.5; 10.4]  |
| Nigeria                               | 2016 | 7.2      | [5.9; 8.4]   | 10.6  | [9.5; 11.6]  | 10.1    | [9.0; 11.3]  | 8.9  | [8.0; 9.9]   | 12.6                   | [10.8; 14.4] | 8.6     | [7.1; 10.0]  | 7.0         | [5.9; 8.1]   |
| S Tome and Principe                   | 2014 | 4.7      | [2.3; 7.1]   | 4.8   | [2.3; 7.3]   | 4.4     | [2.0; 6.9]   | 5.0  | [2.7; 7.3]   | 11.6                   | [0.0; 23.9]  | 4.4     | [2.3; 6.5]   | 4.3         | [1.7; 6.9]   |
| Sierra Leone                          | 2010 | 11.1     | [8.6; 13.7]  | 10.5  | [8.7; 12.3]  | 9.5     | [7.9; 11.2]  | 11.7 | [9.7; 13.7]  | 11.4                   | [9.7; 13.1]  | 9.5     | [6.1; 12.9]  | 6.8         | [3.9; 9.7]   |
| Togo                                  | 2013 | 5.9      | [3.5; 8.2]   | 7.1   | [5.1; 9.0]   | 7.3     | [5.0; 9.6]   | 6.0  | [4.3; 7.7]   | 6.2                    | [4.2; 8.2]   | 7.4     | [4.9; 9.8]   | 6.3         | [3.6; 8.9]   |
| <b>Eastern &amp; Southern Africa</b>  |      |          |              |       |              |         |              |      |              |                        |              |         |              |             |              |
| Burundi                               | 2016 | 3.5      | [1.6; 5.4]   | 7.8   | [6.8; 8.8]   | 6.8     | [5.6; 8.0]   | 8.1  | [6.8; 9.4]   | 8.0                    | [6.7; 9.3]   | 7.4     | [6.0; 8.8]   | 4.5         | [2.4; 6.7]   |
| Eswatini                              | 2014 | 4.8      | [1.3; 8.3]   | 7.1   | [5.1; 9.2]   | 7.3     | [4.9; 9.7]   | 6.0  | [3.7; 8.3]   | 9.2                    | [3.1; 15.3]  | 8.3     | [5.2; 11.3]  | 5.2         | [3.1; 7.2]   |
| Malawi                                | 2013 | 7.4      | [3.6; 11.2]  | 9.8   | [8.7; 10.9]  | 9.6     | [8.2; 11.0]  | 9.4  | [8.1; 10.8]  | 11.1                   | [8.5; 13.7]  | 10.0    | [8.6; 11.4]  | 5.7         | [4.0; 7.4]   |
| Rwanda                                | 2014 | 5.4      | [2.8; 8.0]   | 4.8   | [3.7; 5.9]   | 4.7     | [3.4; 6.0]   | 5.1  | [3.8; 6.4]   | 6.8                    | [4.0; 9.6]   | 4.6     | [3.5; 5.6]   | 4.1         | [2.0; 6.3]   |
| Uganda                                | 2016 | 7.5      | [5.1; 9.8]   | 9.9   | [8.4; 11.4]  | 10.0    | [8.4; 11.7]  | 8.7  | [7.0; 10.4]  | 9.4                    | [6.5; 12.3]  | 10.5    | [8.8; 12.2]  | 6.6         | [4.7; 8.6]   |
| Zimbabwe                              | 2014 | 4.3      | [3.0; 5.6]   | 5.7   | [4.6; 6.9]   | 6.1     | [4.8; 7.4]   | 4.6  | [3.6; 5.6]   | 7.0                    | [3.5; 10.5]  | 5.9     | [4.4; 7.4]   | 4.9         | [3.9; 5.9]   |
| <b>Middle East &amp; North Africa</b> |      |          |              |       |              |         |              |      |              |                        |              |         |              |             |              |
| Algeria                               | 2012 | 3.6      | [2.7; 4.5]   | 4.8   | [3.4; 6.2]   | 3.8     | [2.8; 4.7]   | 4.4  | [3.3; 5.5]   | 4.7                    | [2.9; 6.5]   | 5.7     | [3.8; 7.6]   | 3.4         | [2.5; 4.2]   |
| Iraq                                  | 2011 | 5.3      | [4.5; 6.1]   | 4.7   | [3.7; 5.6]   | 4.9     | [4.1; 5.8]   | 5.2  | [4.4; 6.1]   | 5.5                    | [4.3; 6.8]   | 5.2     | [4.4; 5.9]   | 4.7         | [3.5; 5.9]   |
| Jordan                                | 2012 | 1.1      | [0.5; 1.8]   | 0.8   | [0.2; 1.4]   | 1.0     | [0.3; 1.8]   | 1.1  | [0.3; 1.9]   | 1.0                    | [0.0; 2.4]   | 0.4     | [0.0; 0.9]   | 1.1         | [0.5; 1.7]   |
| State of Palestine                    | 2014 | 1.8      | [0.8; 2.7]   | 2.4   | [0.9; 4.0]   | 1.9     | [0.9; 2.9]   | 1.8  | [0.9; 2.8]   | 8.5                    | [0.0; 22.9]  | 1.4     | [0.6; 2.1]   | 2.1         | [1.1; 3.1]   |
| Tunisia                               | 2011 | 2.8      | [1.4; 4.3]   | 3.5   | [1.7; 5.4]   | 3.1     | [1.5; 4.7]   | 3.1  | [1.4; 4.7]   | 3.9                    | [1.1; 6.7]   | 2.6     | [0.9; 4.4]   | 3.2         | [1.5; 4.9]   |
| <b>Europe &amp; Central Asia</b>      |      |          |              |       |              |         |              |      |              |                        |              |         |              |             |              |
| Belarus                               | 2012 | 0.6      | [0.1; 1.1]   | 0.7   | [0.0; 1.9]   | 0.9     | [0.1; 1.6]   | 0.4  | [0.0; 0.9]   | NA                     | -            | 1.3     | [0.0; 3.5]   | 0.6         | [0.1; 1.1]   |
| Bosnia and Herzegovina                | 2011 | 0.2      | [0.0; 0.6]   | 0.3   | [0.0; 0.7]   | 0.3     | [0.0; 0.8]   | 0.3  | [0.0; 0.6]   | 0.0                    | -            | 0.6     | [0.0; 1.4]   | 0.2         | [0.0; 0.5]   |
| Kazakhstan                            | 2015 | 0.6      | [0.0; 1.3]   | 0.4   | [0.0; 1.0]   | 0.4     | [0.0; 0.8]   | 0.6  | [0.0; 1.4]   | 0.0                    | -            | 25.0    | -            | 0.5         | [0.0; 1.0]   |
| Kosovo                                | 2013 | 1.0      | [0.0; 2.7]   | 1.1   | [0.0; 2.7]   | 0.9     | [0.0; 2.2]   | 1.3  | [0.0; 3.2]   | 0.0                    | -            | 0.0     | -            | 1.2         | [0.0; 2.9]   |
| Kyrgyzstan                            | 2014 | 2.4      | [0.8; 4.1]   | 2.2   | [1.1; 3.4]   | 3.0     | [1.4; 4.6]   | 1.6  | [0.7; 2.5]   | 0.0                    | -            | 12.8    | [0.0; 36.3]  | 2.5         | [1.3; 3.7]   |
| Macedonia                             | 2011 | 0.0      | -            | 0.0   | -            | 0.0     | -            | 0.0  | -            | 0.0                    | -            | 0.0     | [0.0; 0.0]   | 0.0         | [0.0; 0.1]   |
| Moldova                               | 2012 | 0.1      | [0.0; 0.3]   | 0.6   | [0.0; 1.6]   | 0.6     | [0.0; 1.5]   | 0.2  | [0.0; 0.8]   | NA                     | -            | 0.0     | -            | 0.4         | [0.0; 1.1]   |

|                                      |      |     |            |     |            |     |            |     |            |      |             |     |            |     |            |
|--------------------------------------|------|-----|------------|-----|------------|-----|------------|-----|------------|------|-------------|-----|------------|-----|------------|
| <b>Montenegro</b>                    | 2013 | 0.0 | -          | 0.0 | -          | 0.0 | -          | 0.0 | -          | 0.0  | -           | 0.0 | [0.0; 0.0] | 0.0 | [0.0; 0.0] |
| <b>Turkmenistan</b>                  | 2015 | 0.3 | [0.0; 1.2] | 0.2 | [0.0; 0.7] | 0.3 | [0.0; 0.9] | 0.2 | [0.0; 0.9] | NA   | -           | 0.0 | -          | 0.3 | [0.0; 0.9] |
| <b>Ukraine</b>                       | 2012 | 0.4 | [0.0; 0.9] | 0.7 | [0.0; 1.7] | 0.4 | [0.0; 1.0] | 0.6 | [0.0; 1.3] | NA   | -           | NA  | -          | 0.5 | [0.0; 1.1] |
| <b>South Asia</b>                    |      |     |            |     |            |     |            |     |            |      |             |     |            |     |            |
| <b>Bangladesh</b>                    | 2012 | 6.3 | [4.4; 8.2] | 7.5 | [6.5; 8.6] | 7.9 | [6.6; 9.1] | 6.8 | [5.7; 7.9] | 7.1  | [5.6; 8.6]  | 7.8 | [6.2; 9.4] | 7.0 | [5.7; 8.3] |
| <b>Bhutan</b>                        | 2010 | 1.2 | [0.0; 2.3] | 2.1 | [1.2; 2.9] | 1.9 | [0.9; 2.9] | 1.7 | [0.8; 2.6] | 1.4  | [0.6; 2.1]  | 3.5 | [0.9; 6.0] | 2.3 | [0.5; 4.0] |
| <b>Nepal</b>                         | 2014 | 0.8 | [0.0; 1.6] | 3.9 | [2.7; 5.2] | 3.3 | [1.5; 5.0] | 3.8 | [2.5; 5.1] | 3.6  | [2.3; 4.8]  | 2.3 | [0.7; 3.9] | 4.1 | [1.7; 6.5] |
| <b>East Asia &amp; the Pacific</b>   |      |     |            |     |            |     |            |     |            |      |             |     |            |     |            |
| <b>Cameroon</b>                      | 2014 | 3.5 | [1.6; 5.4] | 3.5 | [2.4; 4.5] | 3.0 | [1.8; 4.2] | 3.9 | [2.6; 5.2] | 3.2  | [0.8; 5.6]  | 3.5 | [2.3; 4.7] | 3.6 | [2.1; 5.2] |
| <b>Lao</b>                           | 2011 | 0.5 | [0.1; 0.9] | 2.1 | [1.5; 2.7] | 1.8 | [1.2; 2.4] | 1.8 | [1.2; 2.5] | 2.5  | [1.5; 3.5]  | 1.6 | [1.0; 2.1] | 1.1 | [0.5; 1.8] |
| <b>Mongolia</b>                      | 2013 | 0.6 | [0.0; 1.1] | 0.5 | [0.0; 1.2] | 0.5 | [0.0; 1.1] | 0.6 | [0.0; 1.2] | 0.0  | -           | 1.0 | [0.0; 2.4] | 0.6 | [0.0; 1.1] |
| <b>Thailand</b>                      | 2015 | 1.4 | [0.0; 3.2] | 1.5 | [0.4; 2.7] | 1.5 | [0.0; 3.2] | 1.4 | [0.3; 2.5] | 0.4  | [0.0; 0.9]  | 0.9 | [0.2; 1.6] | 0.8 | [0.2; 1.3] |
| <b>Vietnam</b>                       | 2013 | 1.6 | [0.4; 2.8] | 2.8 | [1.2; 4.4] | 2.2 | [0.9; 3.6] | 2.7 | [1.0; 4.3] | 3.6  | [0.0; 8.0]  | 4.5 | [0.9; 8.1] | 1.9 | [0.9; 2.8] |
| <b>Latin America &amp; Caribbean</b> |      |     |            |     |            |     |            |     |            |      |             |     |            |     |            |
| <b>Argentina</b>                     | 2011 | 1.5 | [0.8; 2.3] | NA  | -          | 1.4 | [0.5; 2.3] | 1.7 | [0.7; 2.7] | 13.4 | [0.0; 37.5] | 1.2 | [0.0; 2.4] | 1.5 | [0.7; 2.4] |
| <b>Belize</b>                        | 2015 | 2.0 | [0.0; 4.3] | 1.7 | [0.3; 3.2] | 1.6 | [0.3; 3.0] | 2.1 | [0.0; 4.3] | 0.0  | -           | 1.8 | [0.3; 3.3] | 3.2 | [0.0; 6.7] |
| <b>Costa Rica</b>                    | 2011 | 1.5 | [0.3; 2.8] | 0.5 | [0.0; 1.3] | 1.2 | [0.0; 2.5] | 1.0 | [0.0; 2.1] | 6.1  | [0.0; 17.2] | 1.2 | [0.0; 2.8] | 0.9 | [0.0; 1.9] |
| <b>Dominican Republic</b>            | 2014 | 2.0 | [1.3; 2.8] | 2.0 | [1.1; 2.9] | 1.8 | [1.0; 2.7] | 2.2 | [1.4; 3.0] | 2.0  | [0.3; 3.7]  | 1.7 | [0.9; 2.5] | 2.2 | [1.4; 3.0] |
| <b>El Salvador</b>                   | 2014 | 1.8 | [1.1; 2.5] | 2.4 | [1.3; 3.4] | 2.4 | [1.5; 3.4] | 1.7 | [1.0; 2.5] | 3.2  | [1.1; 5.3]  | 2.5 | [1.4; 3.7] | 1.6 | [1.0; 2.3] |
| <b>Guyana</b>                        | 2014 | 1.6 | [0.2; 2.9] | 1.7 | [0.6; 2.7] | 1.5 | [0.5; 2.5] | 1.8 | [0.6; 3.0] | 3.1  | [0.0; 7.7]  | 3.1 | [0.5; 5.8] | 1.3 | [0.5; 2.2] |
| <b>Jamaica</b>                       | 2011 | 1.0 | [0.2; 1.8] | 1.7 | [0.0; 3.9] | 0.7 | [0.0; 1.4] | 1.8 | [0.0; 3.7] | NA   | -           | 0.0 | -          | 1.4 | [0.2; 2.6] |
| <b>Mexico</b>                        | 2015 | 0.6 | [0.0; 1.2] | 0.8 | [0.0; 1.7] | 0.5 | [0.0; 1.2] | 0.7 | [0.0; 1.5] | 0.2  | [0.0; 0.7]  | 0.6 | [0.0; 1.2] | 0.6 | [0.0; 1.4] |
| <b>Panama</b>                        | 2013 | 0.4 | [0.0; 1.1] | 1.1 | [0.5; 1.6] | 1.1 | [0.1; 2.1] | 0.3 | [0.0; 0.6] | 0.4  | [0.0; 1.1]  | 1.3 | [0.4; 2.1] | 0.5 | [0.0; 1.1] |
| <b>Paraguay</b>                      | 2016 | 1.4 | [0.3; 2.4] | 0.9 | [0.0; 1.9] | 1.3 | [0.1; 2.4] | 1.1 | [0.2; 2.1] | 2.4  | [0.0; 7.9]  | 1.2 | [0.0; 2.4] | 1.6 | [0.1; 3.1] |
| <b>Suriname</b>                      | 2010 | 1.3 | [0.2; 2.4] | 3.4 | [2.1; 4.7] | 2.0 | [0.9; 3.2] | 2.2 | [1.0; 3.4] | 4.7  | [1.9; 7.6]  | 1.8 | [0.8; 2.8] | 1.6 | [0.3; 2.8] |
| <b>Trinidad and Tobago</b>           | 2011 | 2.4 | [0.4; 4.3] | 0.6 | [0.0; 1.8] | 2.2 | [0.2; 4.2] | 0.9 | [0.0; 2.2] | 0.0  | -           | 0.0 | -          | 1.9 | [0.4; 3.4] |
| <b>Uruguay</b>                       | 2012 | 2.2 | [0.0; 4.5] | NA  | -          | 3.3 | [0.0; 8.1] | 1.1 | [0.0; 2.6] | NA   | -           | 2.2 | [0.0; 4.4] | 2.1 | [0.0; 4.9] |

Note: Data not available marked as NA

Table S8. Prevalence of suspected developmental delay in each studied country for the social-emotional domain by urban/rural residence, sex of the child and maternal education; countries grouped by world region. Source: MICS and DHS surveys, 2010-2016.

| Country                               | Year | Area (%) |              |       |              | Sex (%) |              |      |              | Maternal education (%) |              |         |              |             |              |
|---------------------------------------|------|----------|--------------|-------|--------------|---------|--------------|------|--------------|------------------------|--------------|---------|--------------|-------------|--------------|
|                                       |      | Urban    | 95% IC       | Rural | 95% IC       | Female  | 95% IC       | Male | 95% IC       | None                   | 95% IC       | Primary | 95% IC       | Secondary + | 95% IC       |
| <b>West &amp; Central Africa</b>      |      |          |              |       |              |         |              |      |              |                        |              |         |              |             |              |
| Benin                                 | 2014 | 28.6     | [25.8; 31.5] | 28.3  | [25.6; 31.1] | 24.3    | [21.8; 26.8] | 32.8 | [30.1; 35.5] | 28.1                   | [25.8; 30.4] | 30.0    | [26.1; 33.8] | 27.5        | [22.3; 32.7] |
| Cameroon                              | 2014 | 30.6     | [27.3; 33.8] | 32.4  | [29.5; 35.3] | 29.2    | [26.3; 32.0] | 34.1 | [31.0; 37.1] | 27.2                   | [23.4; 30.9] | 34.4    | [30.9; 37.8] | 33.4        | [29.7; 37.0] |
| CAR                                   | 2010 | 45.6     | [40.2; 51.1] | 40.5  | [37.3; 43.8] | 39.7    | [36.5; 42.8] | 45.2 | [41.6; 48.8] | 39.3                   | [35.5; 43.2] | 42.3    | [38.8; 45.8] | 50.3        | [43.3; 57.4] |
| Chad                                  | 2014 | 39.0     | [34.3; 43.8] | 40.7  | [37.8; 43.7] | 38.4    | [35.4; 41.5] | 42.4 | [39.3; 45.5] | 39.9                   | [37.1; 42.7] | 42.3    | [37.0; 47.6] | 39.9        | [33.2; 46.6] |
| Congo Brazzaville                     | 2014 | 30.8     | [26.9; 34.7] | 45.2  | [42.6; 47.8] | 31.5    | [28.0; 34.9] | 40.4 | [36.7; 44.1] | 38.1                   | [31.7; 44.5] | 37.9    | [33.6; 42.3] | 36.1        | [32.1; 40.1] |
| Congo DR                              | 2013 | 20.0     | [15.9; 24.1] | 21.8  | [17.6; 26.0] | 18.3    | [15.0; 21.7] | 24.3 | [20.3; 28.3] | 17.9                   | [13.5; 22.3] | 24.6    | [19.8; 29.4] | 18.8        | [15.2; 22.4] |
| Côte D'Ivoire                         | 2016 | 34.9     | [29.7; 40.0] | 28.7  | [26.3; 31.0] | 28.2    | [24.9; 31.6] | 33.7 | [30.6; 36.7] | 30.0                   | [27.3; 32.7] | 31.4    | [26.3; 36.4] | 35.7        | [28.9; 42.5] |
| Gambia                                | 2010 | 32.6     | [28.6; 36.6] | 30.3  | [26.9; 33.6] | 30.2    | [27.1; 33.4] | 32.3 | [29.1; 35.4] | 30.8                   | [27.7; 33.8] | 36.4    | [30.3; 42.5] | 30.8        | [25.8; 35.7] |
| Ghana                                 | 2011 | 28.1     | [23.7; 32.4] | 25.4  | [22.4; 28.4] | 22.3    | [18.8; 25.7] | 30.8 | [27.2; 34.3] | 25.0                   | [21.5; 28.5] | 29.4    | [23.8; 34.9] | 26.6        | [22.4; 30.7] |
| Guinea                                | 2016 | 38.2     | [34.3; 42.1] | 38.6  | [35.6; 41.6] | 35.5    | [32.5; 38.6] | 41.3 | [38.2; 44.3] | 38.4                   | [35.8; 41.1] | 39.0    | [33.3; 44.7] | 38.4        | [32.2; 44.6] |
| Guinea Bissau                         | 2014 | 30.5     | [25.4; 35.5] | 24.2  | [21.5; 27.0] | 22.7    | [19.9; 25.5] | 30.5 | [26.7; 34.2] | 25.4                   | [22.5; 28.3] | 29.4    | [24.9; 34.0] | 26.6        | [19.9; 33.2] |
| Mali                                  | 2015 | 30.3     | [26.6; 34.1] | 26.3  | [24.4; 28.3] | 24.3    | [22.2; 26.5] | 29.7 | [27.6; 31.8] | 26.4                   | [24.6; 28.2] | 29.3    | [25.3; 33.2] | 31.9        | [25.5; 38.3] |
| Mauritania                            | 2015 | 31.5     | [27.9; 35.1] | 35.7  | [32.3; 39.1] | 32.9    | [30.0; 35.9] | 34.9 | [31.7; 38.0] | 30.6                   | [27.2; 33.9] | 38.7    | [34.4; 43.1] | 34.2        | [30.6; 37.8] |
| Nigeria                               | 2016 | 26.8     | [24.2; 29.5] | 29.4  | [27.8; 31.0] | 27.4    | [25.7; 29.1] | 29.8 | [28.1; 31.5] | 29.0                   | [26.6; 31.4] | 28.1    | [25.0; 31.2] | 27.1        | [24.8; 29.4] |
| S Tome and Principe                   | 2014 | 40.3     | [35.3; 45.2] | 32.0  | [26.3; 37.7] | 38.4    | [34.1; 42.7] | 36.6 | [31.1; 42.0] | 46.4                   | [30.0; 62.9] | 40.4    | [35.2; 45.5] | 29.9        | [23.6; 36.2] |
| Sierra Leone                          | 2010 | 39.7     | [35.6; 43.9] | 41.1  | [37.5; 44.8] | 39.3    | [35.8; 42.8] | 42.2 | [38.6; 45.7] | 40.9                   | [37.8; 43.9] | 41.4    | [35.2; 47.7] | 39.4        | [33.2; 45.5] |
| Togo                                  | 2013 | 24.0     | [20.3; 27.7] | 24.5  | [21.6; 27.4] | 23.6    | [20.6; 26.5] | 25.1 | [22.1; 28.2] | 25.8                   | [22.5; 29.0] | 23.2    | [19.6; 26.8] | 23.4        | [19.3; 27.5] |
| <b>Eastern &amp; Southern Africa</b>  |      |          |              |       |              |         |              |      |              |                        |              |         |              |             |              |
| Burundi                               | 2016 | 45.2     | [39.2; 51.2] | 40.2  | [37.8; 42.6] | 33.8    | [31.0; 36.6] | 47.4 | [44.5; 50.2] | 39.4                   | [36.5; 42.3] | 41.8    | [38.9; 44.8] | 42.1        | [36.1; 48.2] |
| Eswatini                              | 2014 | 31.8     | [23.7; 39.9] | 35.5  | [31.4; 39.6] | 34.7    | [30.0; 39.5] | 34.8 | [29.9; 39.6] | 38.4                   | [28.8; 47.9] | 35.3    | [29.8; 40.9] | 33.7        | [29.1; 38.4] |
| Malawi                                | 2013 | 30.8     | [26.1; 35.5] | 27.9  | [26.2; 29.5] | 23.9    | [21.9; 25.9] | 32.5 | [30.2; 34.7] | 28.1                   | [24.3; 31.9] | 28.0    | [26.3; 29.7] | 29.1        | [24.8; 33.4] |
| Rwanda                                | 2014 | 17.0     | [9.8; 24.2]  | 18.1  | [15.6; 20.5] | 16.1    | [13.5; 18.8] | 19.6 | [16.8; 22.4] | 20.4                   | [15.9; 24.9] | 18.4    | [15.8; 21.0] | 10.3        | [6.6; 14.0]  |
| Uganda                                | 2016 | 29.1     | [25.2; 33.1] | 33.2  | [31.0; 35.3] | 30.6    | [28.3; 33.0] | 34.1 | [31.7; 36.5] | 32.8                   | [28.4; 37.2] | 32.8    | [30.5; 35.0] | 31.0        | [27.8; 34.2] |
| Zimbabwe                              | 2014 | 35.8     | [32.5; 39.2] | 31.3  | [29.1; 33.4] | 29.5    | [27.1; 31.8] | 35.4 | [33.0; 37.9] | 22.5                   | [16.5; 28.4] | 30.3    | [27.5; 33.1] | 34.7        | [32.3; 37.0] |
| <b>Middle East &amp; North Africa</b> |      |          |              |       |              |         |              |      |              |                        |              |         |              |             |              |
| Algeria                               | 2012 | 30.7     | [28.4; 33.1] | 27.4  | [24.3; 30.5] | 25.9    | [23.4; 28.3] | 32.9 | [30.4; 35.4] | 28.3                   | [24.9; 31.8] | 30.0    | [26.2; 33.9] | 29.7        | [27.4; 32.0] |
| Iraq                                  | 2011 | 22.3     | [20.6; 23.9] | 22.3  | [20.3; 24.2] | 17.4    | [15.9; 19.0] | 26.9 | [25.1; 28.6] | 23.9                   | [21.5; 26.3] | 22.3    | [20.6; 23.9] | 21.2        | [19.0; 23.4] |
| Jordan                                | 2012 | 29.2     | [25.3; 33.2] | 27.7  | [24.1; 31.3] | 26.2    | [22.6; 29.9] | 31.7 | [27.3; 36.0] | 20.6                   | [10.0; 31.2] | 37.6    | [27.4; 47.8] | 28.6        | [25.2; 31.9] |
| State of Palestine                    | 2014 | 28.8     | [26.8; 30.7] | 25.0  | [21.3; 28.8] | 22.9    | [20.7; 25.1] | 33.1 | [30.8; 35.5] | 11.7                   | [0.0; 25.6]  | 31.1    | [28.1; 34.2] | 26.8        | [24.7; 28.9] |
| Tunisia                               | 2011 | 23.2     | [19.3; 27.0] | 26.4  | [21.8; 31.1] | 21.7    | [17.8; 25.6] | 26.8 | [22.6; 31.0] | 28.5                   | [21.6; 35.3] | 27.2    | [22.0; 32.3] | 21.0        | [16.7; 25.2] |
| <b>Europe &amp; Central Asia</b>      |      |          |              |       |              |         |              |      |              |                        |              |         |              |             |              |
| Belarus                               | 2012 | 9.7      | [7.4; 12.0]  | 11.6  | [7.1; 16.1]  | 8.6     | [6.0; 11.1]  | 11.9 | [8.7; 15.2]  | NA                     | -            | 15.7    | [0.0; 31.7]  | 10.0        | [8.0; 12.1]  |
| Bosnia and Herzegovina                | 2011 | 3.2      | [1.3; 5.1]   | 5.3   | [2.2; 8.3]   | 2.1     | [1.0; 3.3]   | 7.1  | [3.0; 11.2]  | 0.0                    | -            | 2.8     | [0.9; 4.7]   | 5.2         | [2.5; 7.9]   |
| Kazakhstan                            | 2015 | 18.3     | [15.4; 21.1] | 15.7  | [11.7; 19.7] | 15.5    | [11.5; 19.4] | 18.4 | [15.1; 21.7] | 0.0                    | -            | 2500.0  | -            | 17.0        | [14.5; 19.6] |
| Kosovo                                | 2013 | 14.7     | [9.9; 19.5]  | 16.0  | [12.2; 19.7] | 11.4    | [7.7; 15.0]  | 19.2 | [14.6; 23.9] | 4.7                    | [0.0; 14.1]  | 30.3    | [16.0; 44.5] | 14.7        | [11.7; 17.7] |
| Kyrgyzstan                            | 2014 | 18.9     | [14.5; 23.3] | 15.0  | [12.7; 17.3] | 15.5    | [12.8; 18.2] | 16.6 | [13.8; 19.4] | 0.0                    | -            | 19.6    | [0.0; 49.5]  | 15.8        | [13.5; 18.1] |
| Macedonia                             | 2011 | 10.9     | [6.8; 14.9]  | 6.6   | [3.0; 10.2]  | 7.9     | [4.5; 11.3]  | 9.5  | [5.4; 13.6]  | 0.0                    | -            | 10.2    | [5.1; 15.2]  | 8.2         | [4.8; 11.5]  |
| Moldova                               | 2012 | 19.7     | [15.4; 24.1] | 20.8  | [15.9; 25.6] | 18.1    | [13.6; 22.6] | 22.4 | [17.5; 27.3] | NA                     | -            | 0.0     | -            | 20.0        | [16.4; 23.5] |

|                                      |      |      |              |      |              |      |              |      |              |      |               |      |              |      |              |
|--------------------------------------|------|------|--------------|------|--------------|------|--------------|------|--------------|------|---------------|------|--------------|------|--------------|
| <b>Montenegro</b>                    | 2013 | 5.4  | [2.2; 8.5]   | 4.5  | [1.7; 7.3]   | 3.4  | [1.2; 5.6]   | 6.3  | [2.6; 10.1]  | 0.0  | -             | 7.4  | [0.8; 14.0]  | 4.7  | [2.3; 7.1]   |
| <b>Turkmenistan</b>                  | 2015 | 6.0  | [3.6; 8.3]   | 5.1  | [3.4; 6.8]   | 5.2  | [3.3; 7.1]   | 5.6  | [3.7; 7.4]   | NA   | -             | 0.0  | -            | 5.4  | [3.9; 6.8]   |
| <b>Ukraine</b>                       | 2012 | 16.2 | [12.9; 19.4] | 15.7 | [11.2; 20.1] | 15.6 | [12.3; 19.0] | 16.4 | [12.9; 19.8] | NA   | -             | NA   | -            | 16.0 | [13.3; 18.6] |
| <b>South Asia</b>                    |      |      |              |      |              |      |              |      |              |      |               |      |              |      |              |
| <b>Bangladesh</b>                    | 2012 | 26.5 | [23.1; 29.9] | 32.6 | [31.1; 34.0] | 28.3 | [26.5; 30.1] | 34.2 | [32.4; 36.0] | 34.8 | [32.5; 37.2]  | 31.9 | [29.7; 34.0] | 28.9 | [27.0; 30.7] |
| <b>Bhutan</b>                        | 2010 | 28.2 | [23.4; 32.9] | 30.2 | [27.2; 33.2] | 26.8 | [23.5; 30.1] | 32.3 | [28.9; 35.6] | 28.6 | [25.8; 31.4]  | 33.6 | [27.1; 40.2] | 30.8 | [25.3; 36.3] |
| <b>Nepal</b>                         | 2014 | 20.9 | [15.8; 26.0] | 32.9 | [30.1; 35.8] | 28.5 | [24.9; 32.1] | 34.1 | [30.6; 37.7] | 32.5 | [29.0; 36.1]  | 30.7 | [24.8; 36.7] | 30.0 | [25.6; 34.4] |
| <b>East Asia &amp; the Pacific</b>   |      |      |              |      |              |      |              |      |              |      |               |      |              |      |              |
| <b>Cambodia</b>                      | 2014 | 24.9 | [20.9; 28.9] | 25.7 | [23.2; 28.2] | 25.4 | [22.5; 28.3] | 25.8 | [22.7; 28.8] | 23.5 | [18.6; 28.3]  | 25.4 | [22.5; 28.2] | 27.1 | [22.9; 31.3] |
| <b>Lao</b>                           | 2011 | 12.9 | [10.0; 15.7] | 15.2 | [13.6; 16.8] | 13.3 | [11.6; 15.1] | 16.1 | [14.2; 17.9] | 17.3 | [14.9; 19.8]  | 13.9 | [12.0; 15.7] | 12.3 | [10.0; 14.7] |
| <b>Mongolia</b>                      | 2013 | 24.3 | [21.6; 26.9] | 23.1 | [20.3; 25.9] | 20.6 | [18.2; 23.0] | 27.0 | [24.0; 29.9] | 14.8 | [9.2; 20.4]   | 21.2 | [14.9; 27.4] | 24.7 | [22.5; 26.8] |
| <b>Thailand</b>                      | 2015 | 18.9 | [14.5; 23.3] | 20.8 | [17.7; 23.8] | 16.9 | [13.9; 19.8] | 23.0 | [19.2; 26.8] | 10.8 | [5.2; 16.3]   | 22.9 | [18.7; 27.1] | 21.5 | [17.4; 25.7] |
| <b>Vietnam</b>                       | 2013 | 7.5  | [4.8; 10.2]  | 7.7  | [5.1; 10.3]  | 6.7  | [4.3; 9.1]   | 8.6  | [5.5; 11.7]  | 7.0  | [1.5; 12.4]   | 12.1 | [6.9; 17.4]  | 6.6  | [4.3; 8.9]   |
| <b>Latin America &amp; Caribbean</b> |      |      |              |      |              |      |              |      |              |      |               |      |              |      |              |
| <b>Argentina</b>                     | 2011 | 18.2 | [16.2; 20.3] | NA   | -            | 16.5 | [13.5; 19.5] | 19.8 | [16.7; 22.9] | 32.2 | [7.3; 57.1]   | 26.5 | [20.9; 32.1] | 15.2 | [13.1; 17.3] |
| <b>Belize</b>                        | 2015 | 17.1 | [13.0; 21.1] | 25.9 | [21.4; 30.3] | 20.4 | [16.3; 24.5] | 24.6 | [20.1; 29.1] | 19.3 | [5.6; 33.1]   | 24.0 | [19.5; 28.5] | 23.2 | [17.8; 28.6] |
| <b>Costa Rica</b>                    | 2011 | 18.7 | [12.2; 25.3] | 22.6 | [17.0; 28.1] | 18.6 | [12.3; 25.0] | 22.2 | [15.5; 28.9] | 40.5 | [11.3; 69.7]  | 27.8 | [20.9; 34.7] | 15.6 | [10.3; 20.9] |
| <b>Dominican Republic</b>            | 2014 | 14.7 | [13.1; 16.3] | 15.5 | [13.4; 17.7] | 13.6 | [11.8; 15.5] | 16.2 | [14.3; 18.1] | 16.7 | [11.0; 22.5]  | 17.6 | [15.2; 20.0] | 13.5 | [11.9; 15.1] |
| <b>El Salvador</b>                   | 2014 | 20.4 | [17.9; 23.0] | 17.8 | [15.3; 20.2] | 16.9 | [14.4; 19.4] | 21.7 | [19.0; 24.3] | 17.8 | [11.7; 24.0]  | 22.0 | [18.8; 25.1] | 17.8 | [15.5; 20.1] |
| <b>Guyana</b>                        | 2014 | 22.0 | [16.1; 27.9] | 26.0 | [22.6; 29.3] | 22.6 | [18.9; 26.3] | 27.0 | [22.4; 31.6] | 14.4 | [4.9; 24.0]   | 27.0 | [20.9; 33.1] | 24.7 | [21.4; 28.1] |
| <b>Jamaica</b>                       | 2011 | 21.5 | [16.5; 26.4] | 21.0 | [13.7; 28.3] | 17.3 | [12.2; 22.5] | 24.6 | [18.9; 30.3] |      |               | 16.5 | [2.8; 30.1]  | 21.5 | [17.3; 25.7] |
| <b>Mexico</b>                        | 2015 | 21.0 | [17.4; 24.6] | 21.4 | [18.1; 24.6] | 18.0 | [13.8; 22.2] | 24.7 | [21.8; 27.6] | 19.6 | [8.0; 31.2]   | 22.0 | [17.8; 26.2] | 20.9 | [17.5; 24.2] |
| <b>Panama</b>                        | 2013 | 18.5 | [13.2; 23.7] | 18.7 | [15.0; 22.4] | 17.0 | [13.2; 20.9] | 19.8 | [15.0; 24.6] | 21.2 | [15.4; 26.9]  | 21.2 | [16.0; 26.5] | 17.4 | [13.1; 21.6] |
| <b>Paraguay</b>                      | 2016 | 19.2 | [15.9; 22.6] | 16.0 | [13.0; 18.9] | 16.4 | [13.3; 19.5] | 19.4 | [16.0; 22.8] | 9.7  | [0.0; 20.3]   | 21.9 | [18.0; 25.9] | 21.4 | [15.6; 27.3] |
| <b>Suriname</b>                      | 2010 | 28.2 | [23.2; 33.2] | 39.1 | [35.3; 42.9] | 28.3 | [24.3; 32.3] | 37.5 | [32.6; 42.3] | 40.5 | [33.8; 47.2]  | 35.3 | [30.6; 40.1] | 28.3 | [23.5; 33.1] |
| <b>Trinidad and Tobago</b>           | 2011 | 22.9 | [16.5; 29.3] | 16.6 | [11.8; 21.4] | 19.5 | [14.0; 25.0] | 20.8 | [14.9; 26.6] | 62.9 | [12.8; 100.0] | 28.0 | [15.5; 40.5] | 18.2 | [13.6; 22.8] |
| <b>Uruguay</b>                       | 2012 | 20.2 | [12.2; 28.2] | 4.1  | [0.0; 9.7]   | 22.6 | [10.3; 34.8] | 17.5 | [10.0; 25.0] | NA   | -             | 23.2 | [5.0; 41.5]  | 18.4 | [10.6; 26.3] |

Note: Data not available marked as NA

Table S9. Prevalence of suspected developmental delay in each studied country for the learning domain by urban/rural residence, sex of the child and maternal education; countries grouped by world region. Source: MICS and DHS surveys, 2010-2016.

| Country                               | Year | Area (%) |              |       |              | Sex (%) |              |      |              | Maternal education (%) |              |         |              |             |              |
|---------------------------------------|------|----------|--------------|-------|--------------|---------|--------------|------|--------------|------------------------|--------------|---------|--------------|-------------|--------------|
|                                       |      | Urban    | 95% IC       | Rural | 95% IC       | Female  | 95% IC       | Male | 95% IC       | None                   | 95% IC       | Primary | 95% IC       | Secondary + | 95% IC       |
| <b>West &amp; Central Africa</b>      |      |          |              |       |              |         |              |      |              |                        |              |         |              |             |              |
| Benin                                 | 2014 | 15.6     | [13.4; 17.8] | 18.6  | [16.3; 20.9] | 16.2    | [14.2; 18.2] | 18.4 | [16.4; 20.4] | 18.2                   | [16.2; 20.2] | 16.3    | [13.5; 19.1] | 15.2        | [11.0; 19.5] |
| Cameroon                              | 2014 | 11.5     | [9.2; 13.9]  | 15.1  | [12.7; 17.5] | 13.1    | [10.7; 15.5] | 14.1 | [11.7; 16.6] | 14.9                   | [11.8; 17.9] | 14.6    | [12.0; 17.2] | 10.9        | [8.1; 13.7]  |
| CAR                                   | 2010 | 19.6     | [16.1; 23.0] | 24.5  | [21.9; 27.1] | 20.6    | [18.2; 23.0] | 25.0 | [22.1; 27.8] | 26.0                   | [22.8; 29.1] | 22.4    | [19.5; 25.3] | 14.9        | [10.7; 19.1] |
| Chad                                  | 2014 | 38.0     | [33.0; 43.1] | 47.0  | [43.7; 50.4] | 43.8    | [40.6; 47.0] | 47.0 | [42.9; 51.1] | 46.9                   | [43.9; 50.0] | 44.6    | [39.0; 50.2] | 34.1        | [27.6; 40.6] |
| Congo Brazzaville                     | 2014 | 12.0     | [9.5; 14.4]  | 19.8  | [16.7; 23.0] | 14.5    | [12.0; 17.0] | 15.2 | [12.8; 17.6] | 22.3                   | [15.9; 28.8] | 17.5    | [14.0; 21.0] | 14.1        | [11.6; 16.7] |
| Congo DR                              | 2013 | 13.8     | [10.9; 16.7] | 21.5  | [17.7; 25.4] | 18.4    | [14.9; 21.8] | 20.0 | [16.6; 23.4] | 24.8                   | [19.2; 30.4] | 20.2    | [16.1; 24.3] | 14.6        | [11.4; 17.8] |
| Côte D'Ivoire                         | 2016 | 7.8      | [5.7; 10.0]  | 12.9  | [9.9; 15.9]  | 10.7    | [8.4; 12.9]  | 11.2 | [8.6; 13.9]  | 12.4                   | [9.9; 14.9]  | 9.7     | [6.6; 12.8]  | 6.2         | [3.2; 9.3]   |
| Gambia                                | 2010 | 3.6      | [2.2; 5.0]   | 5.5   | [3.9; 7.1]   | 3.8     | [2.6; 4.9]   | 5.6  | [4.3; 7.0]   | 5.1                    | [3.9; 6.2]   | 5.1     | [2.2; 7.9]   | 2.7         | [1.2; 4.3]   |
| Ghana                                 | 2011 | 8.9      | [5.9; 11.9]  | 11.8  | [9.3; 14.3]  | 11.4    | [8.4; 14.3]  | 9.7  | [7.6; 11.9]  | 12.6                   | [9.9; 15.4]  | 8.4     | [5.2; 11.7]  | 9.8         | [6.5; 13.0]  |
| Guinea                                | 2016 | 14.6     | [11.0; 18.2] | 21.2  | [18.3; 24.1] | 19.5    | [16.8; 22.3] | 18.6 | [15.7; 21.4] | 20.7                   | [18.1; 23.2] | 14.9    | [10.1; 19.6] | 13.1        | [9.1; 17.0]  |
| Guinea Bissau                         | 2014 | 12.5     | [9.6; 15.4]  | 10.8  | [8.9; 12.8]  | 9.3     | [7.6; 10.9]  | 13.7 | [11.3; 16.0] | 11.1                   | [9.1; 13.1]  | 11.0    | [8.1; 13.8]  | 13.7        | [9.4; 17.9]  |
| Mali                                  | 2015 | 9.9      | [7.5; 12.3]  | 13.9  | [12.2; 15.5] | 12.7    | [10.9; 14.4] | 13.4 | [11.8; 15.1] | 14.3                   | [12.6; 15.9] | 8.4     | [6.1; 10.8]  | 9.9         | [6.4; 13.4]  |
| Mauritania                            | 2015 | 16.8     | [13.9; 19.8] | 19.9  | [16.8; 23.0] | 17.5    | [15.0; 20.1] | 19.7 | [17.0; 22.4] | 22.2                   | [18.2; 26.3] | 20.2    | [16.6; 23.8] | 17.1        | [14.2; 20.1] |
| Nigeria                               | 2016 | 14.6     | [12.2; 17.0] | 24.1  | [22.3; 25.9] | 20.7    | [18.8; 22.5] | 21.6 | [19.8; 23.4] | 28.3                   | [25.4; 31.1] | 21.6    | [19.0; 24.1] | 13.8        | [12.1; 15.6] |
| S Tome and Principe                   | 2014 | 19.9     | [15.6; 24.2] | 19.3  | [14.7; 24.0] | 16.9    | [12.6; 21.2] | 22.5 | [17.9; 27.0] | 16.3                   | [5.6; 27.1]  | 20.4    | [16.5; 24.4] | 18.7        | [12.1; 25.3] |
| Sierra Leone                          | 2010 | 21.1     | [17.0; 25.2] | 22.7  | [20.3; 25.0] | 23.7    | [21.0; 26.4] | 20.8 | [18.4; 23.2] | 23.2                   | [21.0; 25.5] | 19.5    | [14.7; 24.3] | 18.5        | [13.8; 23.3] |
| Togo                                  | 2013 | 26.7     | [22.8; 30.6] | 29.6  | [25.8; 33.4] | 25.5    | [22.3; 28.8] | 31.7 | [28.0; 35.4] | 30.6                   | [26.5; 34.8] | 26.9    | [22.9; 30.9] | 27.2        | [22.1; 32.2] |
| <b>Eastern &amp; Southern Africa</b>  |      |          |              |       |              |         |              |      |              |                        |              |         |              |             |              |
| Burundi                               | 2016 | 21.0     | [14.9; 27.0] | 37.3  | [35.0; 39.5] | 34.0    | [31.4; 36.5] | 37.8 | [35.0; 40.5] | 39.2                   | [36.4; 42.0] | 35.4    | [32.4; 38.3] | 19.5        | [15.4; 23.7] |
| Eswatini                              | 2014 | 1.4      | [-0.2; 2.9]  | 5.9   | [3.6; 8.1]   | 3.3     | [1.7; 5.0]   | 6.5  | [3.9; 9.1]   | 6.7                    | [2.2; 11.1]  | 5.2     | [2.4; 8.0]   | 4.4         | [2.5; 6.4]   |
| Malawi                                | 2013 | 12.2     | [8.6; 15.8]  | 19.6  | [18.0; 21.3] | 18.4    | [16.5; 20.4] | 19.1 | [17.2; 21.0] | 25.1                   | [21.4; 28.7] | 18.8    | [17.1; 20.5] | 12.2        | [9.4; 14.9]  |
| Rwanda                                | 2014 | 8.8      | [5.5; 12.2]  | 14.0  | [12.2; 15.8] | 12.8    | [10.6; 15.0] | 13.6 | [11.5; 15.6] | 17.7                   | [13.8; 21.6] | 13.2    | [11.3; 15.1] | 5.6         | [2.9; 8.4]   |
| Uganda                                | 2016 | 9.6      | [7.1; 12.0]  | 14.2  | [12.6; 15.9] | 13.7    | [11.9; 15.4] | 12.9 | [11.0; 14.8] | 14.0                   | [11.0; 16.9] | 15.0    | [13.0; 16.9] | 8.8         | [6.7; 10.9]  |
| Zimbabwe                              | 2014 | 6.4      | [4.9; 8.0]   | 11.4  | [9.8; 13.0]  | 10.0    | [8.5; 11.6]  | 10.3 | [8.5; 12.0]  | 15.6                   | [9.1; 22.1]  | 10.9    | [9.0; 12.8]  | 9.2         | [7.8; 10.6]  |
| <b>Middle East &amp; North Africa</b> |      |          |              |       |              |         |              |      |              |                        |              |         |              |             |              |
| Algeria                               | 2012 | 9.6      | [8.2; 11.0]  | 10.1  | [8.0; 12.1]  | 9.4     | [8.0; 10.8]  | 10.1 | [8.7; 11.6]  | 12.4                   | [10.2; 14.7] | 8.1     | [6.1; 10.0]  | 9.5         | [8.0; 10.9]  |
| Iraq                                  | 2011 | 9.5      | [8.3; 10.6]  | 12.1  | [10.7; 13.5] | 9.4     | [8.3; 10.4]  | 11.3 | [10.1; 12.5] | 13.2                   | [11.3; 15.1] | 10.9    | [9.8; 12.1]  | 7.8         | [6.5; 9.1]   |
| Jordan                                | 2012 | 9.2      | [7.3; 11.1]  | 9.4   | [7.2; 11.7]  | 7.1     | [5.3; 8.8]   | 11.3 | [8.4; 14.2]  | 12.7                   | [5.8; 19.6]  | 10.7    | [6.0; 15.3]  | 9.0         | [7.2; 10.8]  |
| State of Palestine                    | 2014 | 7.1      | [5.9; 8.4]   | 7.4   | [4.8; 10.0]  | 6.5     | [5.3; 7.8]   | 7.7  | [6.2; 9.2]   | 11.3                   | [0.0; 25.9]  | 8.7     | [6.7; 10.7]  | 6.3         | [5.2; 7.5]   |
| Tunisia                               | 2011 | 6.4      | [4.1; 8.7]   | 6.2   | [3.6; 8.8]   | 5.6     | [3.1; 8.1]   | 7.1  | [4.8; 9.3]   | 8.7                    | [3.9; 13.6]  | 6.2     | [3.6; 8.8]   | 5.8         | [3.3; 8.3]   |
| <b>Europe &amp; Central Asia</b>      |      |          |              |       |              |         |              |      |              |                        |              |         |              |             |              |
| Belarus                               | 2012 | 0.0      | -            | 0.0   | -            | 0.0     | -            | 0.0  | -            | NA                     | -            | 0.0     | -            | 0.0         | [0.0; 0.1]   |
| Bosnia and Herzegovina                | 2011 | 1.0      | [0.0; 2.0]   | 0.8   | [0.1; 1.6]   | 0.5     | [0.0; 1.1]   | 1.2  | [0.2; 2.3]   | 0.0                    | -            | 1.0     | [0.0; 2.2]   | 0.8         | [0.1; 1.5]   |
| Kazakhstan                            | 2015 | 2.1      | [0.9; 3.2]   | 1.6   | [0.6; 2.5]   | 1.7     | [0.9; 2.6]   | 1.9  | [0.7; 3.1]   | 0.0                    | -            | 25.0    | -            | 1.8         | [0.9; 2.8]   |
| Kosovo                                | 2013 | 3.5      | [0.6; 6.5]   | 2.7   | [0.9; 4.5]   | 2.2     | [0.6; 3.7]   | 3.8  | [1.0; 6.5]   | 0.0                    | -            | 4.6     | [0.0; 11.1]  | 3.0         | [1.1; 4.9]   |
| Kyrgyzstan                            | 2014 | 5.5      | [3.3; 7.7]   | 6.4   | [4.0; 8.8]   | 5.9     | [3.5; 8.4]   | 6.4  | [4.0; 8.8]   | 0.0                    | -            | 14.6    | [0.0; 40.2]  | 5.8         | [3.8; 7.9]   |
| Macedonia                             | 2011 | 1.1      | [0.0; 2.4]   | 1.7   | [0.1; 3.4]   | 1.8     | [0.0; 3.6]   | 1.0  | [0.0; 2.2]   | 21.2                   | [0.0; 49.8]  | 2.2     | [0.3; 4.1]   | 0.3         | [0.0; 0.9]   |

|                                      |      |      |             |      |              |      |              |      |              |      |              |      |              |      |             |
|--------------------------------------|------|------|-------------|------|--------------|------|--------------|------|--------------|------|--------------|------|--------------|------|-------------|
| <b>Moldova</b>                       | 2012 | 0.1  | [0.0; 0.6]  | 0.5  | [0.0; 1.3]   | 0.5  | [0.0; 1.0]   | 0.2  | [0.0; 1.0]   | NA   | -            | 0.0  | -            | 0.1  | [0.0; 0.6]  |
| <b>Montenegro</b>                    | 2013 | 1.0  | [0.0; 2.4]  | 1.1  | [0.0; 2.9]   | 0.8  | [0.0; 2.4]   | 1.2  | [0.0; 2.5]   | 0.0  | -            | 3.0  | [0.0; 9.0]   | 0.6  | [0.0; 1.4]  |
| <b>Turkmenistan</b>                  | 2015 | 1.7  | [0.4; 3.1]  | 3.1  | [1.1; 5.1]   | 3.1  | [1.0; 5.1]   | 2.2  | [0.7; 3.7]   | NA   | -            | 0.0  | -            | 2.6  | [1.0; 4.3]  |
| <b>Ukraine</b>                       | 2012 | 1.1  | [0.5; 1.8]  | 1.8  | [0.5; 3.0]   | 1.0  | [0.3; 1.7]   | 1.6  | [0.7; 2.6]   | NA   | -            | NA   | -            | 1.3  | [0.6; 2.0]  |
| <b>South Asia</b>                    |      |      |             |      |              |      |              |      |              |      |              |      |              |      |             |
| <b>Bangladesh</b>                    | 2012 | 11.4 | [8.7; 14.1] | 12.2 | [11.1; 13.3] | 12.3 | [10.8; 13.8] | 11.8 | [10.4; 13.2] | 14.8 | [12.8; 16.8] | 12.8 | [11.0; 14.7] | 9.8  | [8.4; 11.2] |
| <b>Bhutan</b>                        | 2010 | 5.7  | [3.6; 7.8]  | 6.2  | [4.6; 7.8]   | 5.2  | [3.4; 7.1]   | 6.8  | [5.2; 8.4]   | 6.4  | [4.9; 7.9]   | 8.4  | [3.2; 13.5]  | 3.1  | [1.5; 4.8]  |
| <b>Nepal</b>                         | 2014 | 9.7  | [5.9; 13.6] | 19.1 | [15.5; 22.7] | 17.1 | [13.0; 21.2] | 18.5 | [15.1; 22.0] | 22.0 | [17.1; 26.9] | 17.7 | [12.8; 22.5] | 12.1 | [8.9; 15.2] |
| <b>East Asia &amp; the Pacific</b>   |      |      |             |      |              |      |              |      |              |      |              |      |              |      |             |
| <b>Cambodia</b>                      | 2014 | 4.6  | [2.8; 6.5]  | 11.1 | [9.3; 12.8]  | 10.2 | [8.0; 12.3]  | 10.2 | [8.3; 12.2]  | 11.6 | [7.3; 15.9]  | 11.1 | [9.1; 13.0]  | 7.9  | [5.8; 10.0] |
| <b>Lao</b>                           | 2011 | 3.2  | [1.1; 5.3]  | 6.8  | [5.4; 8.2]   | 6.1  | [4.7; 7.4]   | 6.1  | [4.6; 7.5]   | 10.3 | [7.7; 12.9]  | 4.2  | [3.1; 5.3]   | 2.9  | [1.6; 4.2]  |
| <b>Mongolia</b>                      | 2013 | 1.5  | [0.7; 2.2]  | 2.1  | [1.1; 3.1]   | 1.3  | [0.6; 2.0]   | 2.1  | [1.2; 3.1]   | 3.1  | [0.2; 6.1]   | 4.9  | [2.1; 7.7]   | 1.3  | [0.7; 2.0]  |
| <b>Thailand</b>                      | 2015 | 0.4  | [0.0; 0.9]  | 0.4  | [0.0; 0.9]   | 0.4  | [0.0; 0.9]   | 0.4  | [0.0; 0.9]   | 3.3  | [0.0; 8.5]   | 0.3  | [0.0; 0.8]   | 0.4  | [0.0; 0.9]  |
| <b>Vietnam</b>                       | 2013 | 3.6  | [1.9; 5.4]  | 5.2  | [3.3; 7.2]   | 4.8  | [2.8; 6.7]   | 4.7  | [2.7; 6.8]   | 18.6 | [9.7; 27.4]  | 4.6  | [2.1; 7.1]   | 3.6  | [2.1; 5.0]  |
| <b>Latin America &amp; Caribbean</b> |      |      |             |      |              |      |              |      |              |      |              |      |              |      |             |
| <b>Argentina</b>                     | 2011 | 2.1  | [1.2; 3.0]  | NA   | -            | 2.2  | [1.0; 3.3]   | 2.0  | [0.8; 3.2]   | 13.3 | [0.0; 37.4]  | 3.1  | [0.8; 5.5]   | 1.6  | [0.8; 2.3]  |
| <b>Belize</b>                        | 2015 | 4.2  | [1.8; 6.6]  | 5.1  | [2.2; 8.1]   | 4.1  | [1.9; 6.3]   | 5.5  | [2.3; 8.6]   | 7.9  | [0.0; 17.0]  | 5.5  | [1.8; 9.3]   | 4.0  | [1.7; 6.3]  |
| <b>Costa Rica</b>                    | 2011 | 0.0  | -           | 0.9  | [0.0; 1.8]   | 0.6  | [0.0; 1.4]   | 0.2  | [0.0; 0.4]   | 4.5  | [0.0; 10.7]  | 0.8  | [0.0; 1.9]   | 0.0  | [0.0; 0.1]  |
| <b>Dominican Republic</b>            | 2014 | 1.9  | [1.3; 2.5]  | 2.4  | [1.3; 3.5]   | 2.0  | [1.2; 2.9]   | 2.1  | [1.4; 2.7]   | 5.6  | [1.7; 9.5]   | 2.1  | [1.2; 3.1]   | 1.7  | [1.2; 2.3]  |
| <b>El Salvador</b>                   | 2014 | 1.7  | [1.0; 2.5]  | 3.2  | [1.6; 4.8]   | 2.5  | [1.2; 3.8]   | 2.3  | [1.3; 3.2]   | 5.3  | [1.7; 8.9]   | 3.0  | [1.6; 4.4]   | 1.6  | [0.8; 2.3]  |
| <b>Guyana</b>                        | 2014 | 2.7  | [1.0; 4.4]  | 3.7  | [2.0; 5.5]   | 2.6  | [1.1; 4.0]   | 4.3  | [2.1; 6.5]   | 4.9  | [0.0; 11.1]  | 6.6  | [2.6; 10.7]  | 2.9  | [1.6; 4.1]  |
| <b>Jamaica</b>                       | 2011 | 2.3  | [0.7; 4.0]  | 3.2  | [0.8; 5.6]   | 2.4  | [0.7; 4.1]   | 3.0  | [0.8; 5.2]   | NA   | -            | 4.8  | [0.0; 14.3]  | 2.6  | [1.2; 4.1]  |
| <b>Mexico</b>                        | 2015 | 1.1  | [0.5; 1.8]  | 1.7  | [0.8; 2.5]   | 0.8  | [0.4; 1.2]   | 1.8  | [0.8; 2.9]   | 3.1  | [0.4; 5.8]   | 1.7  | [0.6; 2.9]   | 1.1  | [0.6; 1.7]  |
| <b>Panama</b>                        | 2013 | 2.7  | [1.0; 4.3]  | 5.3  | [2.9; 7.7]   | 4.7  | [2.4; 7.1]   | 2.8  | [1.1; 4.5]   | 10.6 | [5.8; 15.5]  | 3.6  | [2.0; 5.3]   | 3.2  | [1.3; 5.1]  |
| <b>Paraguay</b>                      | 2016 | 3.0  | [1.5; 4.4]  | 3.2  | [1.0; 5.4]   | 3.4  | [1.4; 5.4]   | 2.7  | [1.2; 4.2]   | 11.7 | [0.0; 25.6]  | 5.1  | [2.4; 7.7]   | 4.5  | [1.3; 7.7]  |
| <b>Suriname</b>                      | 2010 | 2.5  | [0.9; 4.1]  | 3.2  | [2.1; 4.3]   | 2.8  | [1.2; 4.4]   | 2.8  | [1.4; 4.1]   | 5.6  | [3.0; 8.2]   | 2.4  | [0.8; 3.9]   | 2.3  | [0.7; 3.9]  |
| <b>Trinidad and Tobago</b>           | 2011 | 3.1  | [0.3; 6.0]  | 2.7  | [0.5; 4.9]   | 1.8  | [0.0; 3.8]   | 4.2  | [1.5; 7.0]   | 0.0  | -            | 3.3  | [0.0; 7.3]   | 2.9  | [1.0; 4.9]  |
| <b>Uruguay</b>                       | 2012 | 1.8  | [0.0; 3.8]  | 1.6  | [0.0; 4.8]   | 2.9  | [0.0; 7.3]   | 0.9  | [0.0; 1.8]   | NA   | -            | 1.7  | [0.0; 4.0]   | 1.8  | [0.0; 4.4]  |

Note: Data not available marked as NA

Table S10. Prevalence of suspected developmental delay in each studied country for the literacy-numeracy domain by urban/rural residence, sex of the child and maternal education; countries grouped by world region. Source: MICS and DHS surveys, 2010-2016.

| Country                               | Year | Area (%) |              |       |              | Sex (%) |              |      |              | Maternal education (%) |               |         |               |             |              |
|---------------------------------------|------|----------|--------------|-------|--------------|---------|--------------|------|--------------|------------------------|---------------|---------|---------------|-------------|--------------|
|                                       |      | Urban    | 95% IC       | Rural | 95% IC       | Female  | 95% IC       | Male | 95% IC       | None                   | 95% IC        | Primary | 95% IC        | Secondary + | 95% IC       |
| <b>West &amp; Central Africa</b>      |      |          |              |       |              |         |              |      |              |                        |               |         |               |             |              |
| Benin                                 | 2014 | 86.4     | [84.1; 88.8] | 97.0  | [96.1; 97.9] | 92.6    | [90.9; 94.3] | 92.3 | [90.7; 93.8] | 96.7                   | [95.9; 97.5]  | 87.7    | [84.5; 90.9]  | 78.7        | [72.9; 84.4] |
| Cameroon                              | 2014 | 73.3     | [69.2; 77.3] | 91.2  | [89.1; 93.4] | 82.1    | [79.1; 85.1] | 85.6 | [82.9; 88.3] | 97.7                   | [96.5; 98.9]  | 83.7    | [80.6; 86.7]  | 67.3        | [63.5; 71.0] |
| CAR                                   | 2010 | 86.8     | [83.5; 90.2] | 96.0  | [94.8; 97.1] | 92.6    | [90.7; 94.4] | 92.8 | [90.8; 94.9] | 96.5                   | [95.0; 97.9]  | 93.2    | [91.4; 95.0]  | 81.4        | [76.6; 86.1] |
| Chad                                  | 2014 | 88.2     | [85.2; 91.3] | 96.0  | [95.0; 97.0] | 94.4    | [92.9; 95.8] | 94.8 | [93.6; 96.0] | 95.6                   | [94.5; 96.7]  | 94.3    | [92.3; 96.2]  | 86.8        | [82.3; 91.3] |
| Congo Brazzaville                     | 2014 | 82.0     | [79.3; 84.8] | 93.6  | [92.2; 95.1] | 84.7    | [81.9; 87.5] | 87.8 | [85.1; 90.6] | 96.4                   | [94.3; 98.6]  | 94.1    | [91.7; 96.4]  | 85.9        | [83.3; 88.4] |
| Congo DR                              | 2013 | 84.2     | [80.5; 87.9] | 91.4  | [89.0; 93.8] | 89.3    | [86.6; 91.9] | 89.2 | [86.8; 91.5] | 93.8                   | [91.0; 96.6]  | 91.7    | [89.3; 94.0]  | 83.4        | [79.7; 87.2] |
| Côte D'Ivoire                         | 2016 | 83.9     | [79.8; 88.0] | 97.7  | [96.8; 98.6] | 91.5    | [88.8; 94.2] | 93.4 | [91.5; 95.3] | 97.2                   | [96.1; 98.3]  | 90.2    | [86.6; 93.8]  | 72.3        | [64.3; 80.3] |
| Gambia                                | 2010 | 83.4     | [79.2; 87.5] | 90.9  | [88.6; 93.2] | 87.1    | [84.0; 90.2] | 88.2 | [85.7; 90.7] | 91.8                   | [89.9; 93.7]  | 84.7    | [78.9; 90.6]  | 69.2        | [62.0; 76.4] |
| Ghana                                 | 2011 | 57.5     | [52.2; 62.7] | 82.1  | [79.2; 85.0] | 68.7    | [64.7; 72.7] | 74.4 | [70.5; 78.3] | 88.3                   | [85.8; 90.8]  | 75.3    | [69.4; 81.1]  | 55.0        | [49.8; 60.2] |
| Guinea                                | 2016 | 85.6     | [82.1; 89.0] | 98.2  | [97.4; 99.0] | 94.7    | [93.0; 96.3] | 93.7 | [92.1; 95.3] | 96.8                   | [95.8; 97.7]  | 89.6    | [85.6; 93.6]  | 82.6        | [77.6; 87.5] |
| Guinea Bissau                         | 2014 | 81.8     | [77.7; 86.0] | 98.5  | [98.0; 99.0] | 91.2    | [88.9; 93.5] | 93.7 | [91.6; 95.8] | 98.0                   | [97.2; 98.8]  | 91.5    | [88.8; 94.2]  | 70.3        | [63.5; 77.0] |
| Mali                                  | 2015 | 84.2     | [81.1; 87.3] | 93.2  | [91.9; 94.5] | 91.8    | [90.4; 93.1] | 91.2 | [89.6; 92.7] | 93.6                   | [92.3; 94.9]  | 89.4    | [86.2; 92.5]  | 84.4        | [80.1; 88.6] |
| Mauritania                            | 2015 | 67.4     | [63.8; 71.0] | 76.4  | [73.5; 79.3] | 72.0    | [69.0; 75.0] | 73.1 | [70.2; 76.0] | 78.1                   | [74.6; 81.7]  | 73.5    | [69.5; 77.4]  | 72.4        | [69.1; 75.7] |
| Nigeria                               | 2016 | 48.6     | [44.2; 53.0] | 79.9  | [78.1; 81.6] | 69.1    | [66.8; 71.4] | 71.5 | [69.4; 73.5] | 90.7                   | [89.3; 92.1]  | 68.3    | [65.4; 71.1]  | 42.2        | [39.3; 45.1] |
| S Tome and Principe                   | 2014 | 81.8     | [77.3; 86.3] | 89.3  | [85.2; 93.4] | 83.7    | [79.5; 87.9] | 85.0 | [80.6; 89.3] | 80.6                   | [64.7; 96.6]  | 86.9    | [83.1; 90.7]  | 79.4        | [72.0; 86.8] |
| Sierra Leone                          | 2010 | 83.8     | [80.0; 87.5] | 93.0  | [91.6; 94.4] | 90.4    | [88.6; 92.2] | 90.7 | [88.9; 92.5] | 93.4                   | [92.2; 94.6]  | 88.9    | [83.9; 93.8]  | 72.9        | [66.7; 79.1] |
| Togo                                  | 2013 | 84.1     | [80.6; 87.6] | 96.6  | [95.3; 97.8] | 92.4    | [90.3; 94.5] | 92.2 | [90.1; 94.3] | 97.1                   | [96.0; 98.2]  | 91.6    | [88.9; 94.3]  | 83.1        | [78.7; 87.6] |
| <b>Eastern &amp; Southern Africa</b>  |      |          |              |       |              |         |              |      |              |                        |               |         |               |             |              |
| Burundi                               | 2016 | 70.6     | [65.8; 75.4] | 93.2  | [92.2; 94.2] | 90.8    | [89.3; 92.3] | 91.8 | [90.5; 93.2] | 95.4                   | [94.4; 96.4]  | 90.6    | [89.0; 92.3]  | 71.0        | [66.1; 75.9] |
| Eswatini                              | 2014 | 68.4     | [60.7; 76.1] | 86.3  | [83.5; 89.1] | 78.2    | [73.9; 82.5] | 87.1 | [83.9; 90.3] | 91.2                   | [85.6; 96.7]  | 91.4    | [88.4; 94.5]  | 75.4        | [71.2; 79.7] |
| Malawi                                | 2013 | 62.9     | [58.2; 67.5] | 85.3  | [83.9; 86.7] | 79.4    | [77.4; 81.5] | 86.0 | [84.3; 87.7] | 91.1                   | [88.9; 93.3]  | 84.4    | [82.8; 85.9]  | 65.9        | [61.7; 70.1] |
| Rwanda                                | 2014 | 82.8     | [78.5; 87.1] | 94.7  | [93.5; 95.9] | 92.0    | [90.1; 94.0] | 93.6 | [92.3; 95.0] | 97.5                   | [96.0; 99.1]  | 93.5    | [92.1; 94.9]  | 80.4        | [75.0; 85.8] |
| Uganda                                | 2016 | 53.1     | [47.9; 58.4] | 75.6  | [73.6; 77.6] | 69.7    | [67.1; 72.4] | 72.4 | [69.8; 74.9] | 85.9                   | [82.4; 89.3]  | 76.6    | [74.6; 78.7]  | 49.3        | [45.4; 53.2] |
| Zimbabwe                              | 2014 | 85.7     | [83.3; 88.1] | 93.3  | [92.2; 94.3] | 90.9    | [89.5; 92.3] | 91.9 | [90.6; 93.2] | 97.1                   | [94.7; 99.5]  | 94.7    | [93.4; 95.9]  | 88.7        | [87.1; 90.2] |
| <b>Middle East &amp; North Africa</b> |      |          |              |       |              |         |              |      |              |                        |               |         |               |             |              |
| Algeria                               | 2012 | 65.6     | [62.8; 68.4] | 80.6  | [77.6; 83.6] | 69.6    | [66.6; 72.5] | 72.7 | [70.2; 75.2] | 86.2                   | [83.6; 88.8]  | 78.0    | [74.5; 81.5]  | 64.3        | [61.5; 67.1] |
| Iraq                                  | 2011 | 78.1     | [75.9; 80.2] | 89.5  | [88.1; 90.9] | 81.2    | [79.3; 83.0] | 82.8 | [81.0; 84.7] | 89.8                   | [88.2; 91.5]  | 84.7    | [82.7; 86.6]  | 73.2        | [70.3; 76.0] |
| Jordan                                | 2012 | 82.4     | [79.2; 85.5] | 89.2  | [86.9; 91.5] | 82.5    | [78.6; 86.3] | 84.6 | [81.6; 87.7] | 95.9                   | [91.5; 100.0] | 85.5    | [78.2; 92.9]  | 83.0        | [80.2; 85.9] |
| State of Palestine                    | 2014 | 81.0     | [79.2; 82.9] | 81.9  | [77.7; 86.0] | 79.6    | [77.3; 81.9] | 82.6 | [80.5; 84.7] | 97.0                   | [90.6; 100.0] | 86.8    | [84.5; 89.0]  | 78.0        | [75.9; 80.2] |
| Tunisia                               | 2011 | 61.2     | [56.1; 66.2] | 78.7  | [73.0; 84.5] | 64.7    | [59.3; 70.1] | 70.2 | [65.2; 75.2] | 83.2                   | [74.8; 91.6]  | 70.9    | [65.4; 76.3]  | 60.4        | [55.0; 65.7] |
| <b>Europe &amp; Central Asia</b>      |      |          |              |       |              |         |              |      |              |                        |               |         |               |             |              |
| Belarus                               | 2012 | 47.5     | [43.0; 51.9] | 64.2  | [57.1; 71.4] | 45.2    | [39.5; 50.8] | 59.2 | [54.0; 64.4] | NA                     | -             | 87.8    | [79.1; 96.5]  | 50.8        | [46.9; 54.7] |
| Bosnia and Herzegovina                | 2011 | 64.8     | [56.4; 73.2] | 79.7  | [75.4; 84.1] | 70.1    | [64.0; 76.2] | 79.1 | [74.0; 84.1] | 79.9                   | [56.3; 103.5] | 81.8    | [75.3; 88.3]  | 72.0        | [67.2; 76.9] |
| Kazakhstan                            | 2015 | 67.0     | [63.2; 70.8] | 78.3  | [74.8; 81.8] | 71.0    | [67.0; 75.1] | 74.6 | [70.8; 78.4] | 100.0                  | -             | 75.0    | -             | 72.8        | [69.9; 75.8] |
| Kosovo                                | 2013 | 78.1     | [70.4; 85.8] | 85.2  | [81.4; 88.9] | 81.5    | [76.2; 86.8] | 83.5 | [79.1; 88.0] | 93.9                   | [81.7; 100.0] | 93.5    | [86.4; 100.0] | 81.5        | [77.3; 85.8] |
| Kyrgyzstan                            | 2014 | 77.3     | [72.5; 82.0] | 89.4  | [86.8; 91.9] | 83.9    | [80.6; 87.3] | 88.1 | [85.3; 91.0] | 100.0                  | -             | 69.6    | [7.1; 100.0]  | 85.2        | [82.7; 87.8] |
| Macedonia                             | 2011 | 53.6     | [47.0; 60.2] | 60.8  | [52.8; 68.8] | 57.6    | [50.2; 65.0] | 56.8 | [49.2; 64.3] | 74.1                   | [47.5; 100.0] | 62.4    | [53.7; 71.2]  | 53.3        | [47.2; 59.3] |
| Moldova                               | 2012 | 62.2     | [56.5; 68.0] | 75.8  | [71.1; 80.6] | 69.7    | [63.8; 75.6] | 71.7 | [66.5; 76.9] | NA                     | -             | 94.0    | [81.4; 100.0] | 70.0        | [66.1; 73.9] |



|                                      |      |      |              |      |              |      |              |      |              |       |               |       |              |      |              |
|--------------------------------------|------|------|--------------|------|--------------|------|--------------|------|--------------|-------|---------------|-------|--------------|------|--------------|
| <b>Montenegro</b>                    | 2013 | 74.3 | [68.1; 80.6] | 86.7 | [80.7; 92.7] | 80.1 | [74.0; 86.1] | 77.8 | [71.4; 84.2] | 100.0 | -             | 91.4  | [85.1; 97.7] | 76.3 | [70.8; 81.8] |
| <b>Turkmenistan</b>                  | 2015 | 81.9 | [77.7; 86.2] | 83.1 | [78.9; 87.3] | 83.2 | [79.2; 87.3] | 82.2 | [78.7; 85.7] | NA    | -             | 100.0 | -            | 82.7 | [79.4; 85.9] |
| <b>Ukraine</b>                       | 2012 | 49.8 | [43.9; 55.7] | 64.6 | [58.5; 70.7] | 53.0 | [46.7; 59.2] | 55.7 | [50.4; 60.9] | NA    | -             | NA    | -            | 54.3 | [49.7; 58.9] |
| <b>South Asia</b>                    |      |      |              |      |              |      |              |      |              |       |               |       |              |      |              |
| <b>Bangladesh</b>                    | 2012 | 66.6 | [62.5; 70.8] | 82.8 | [81.6; 83.9] | 79.1 | [77.2; 81.0] | 80.0 | [78.3; 81.7] | 91.0  | [89.5; 92.6]  | 86.7  | [85.0; 88.5] | 67.2 | [64.9; 69.5] |
| <b>Bhutan</b>                        | 2010 | 61.9 | [55.0; 68.9] | 80.2 | [77.6; 82.8] | 73.8 | [69.8; 77.7] | 76.2 | [72.8; 79.5] | 82.6  | [79.9; 85.3]  | 72.9  | [65.8; 80.0] | 46.7 | [40.5; 52.9] |
| <b>Nepal</b>                         | 2014 | 41.0 | [34.3; 47.7] | 76.4 | [72.5; 80.3] | 70.0 | [65.1; 74.9] | 73.3 | [69.1; 77.5] | 89.0  | [86.3; 91.8]  | 74.8  | [69.3; 80.3] | 45.1 | [39.9; 50.3] |
| <b>East Asia &amp; the Pacific</b>   |      |      |              |      |              |      |              |      |              |       |               |       |              |      |              |
| <b>Cambodia</b>                      | 2014 | 57.8 | [52.6; 63.1] | 75.2 | [72.1; 78.2] | 72.3 | [68.5; 76.1] | 73.5 | [70.1; 76.8] | 87.4  | [83.4; 91.5]  | 76.2  | [72.8; 79.5] | 59.1 | [54.6; 63.6] |
| <b>Lao</b>                           | 2011 | 56.3 | [50.6; 62.0] | 86.0 | [84.3; 87.8] | 78.3 | [75.7; 80.8] | 81.9 | [79.7; 84.2] | 93.1  | [91.4; 94.8]  | 83.0  | [80.8; 85.2] | 55.3 | [50.9; 59.6] |
| <b>Mongolia</b>                      | 2013 | 90.0 | [88.1; 91.9] | 93.6 | [91.9; 95.3] | 89.9 | [88.0; 91.8] | 93.0 | [91.4; 94.7] | 93.4  | [88.8; 98.1]  | 94.6  | [91.1; 98.0] | 91.1 | [89.6; 92.5] |
| <b>Thailand</b>                      | 2015 | 26.5 | [21.8; 31.3] | 29.1 | [25.5; 32.7] | 26.6 | [22.8; 30.3] | 29.5 | [25.5; 33.4] | 38.9  | [24.9; 53.0]  | 31.5  | [26.5; 36.6] | 28.3 | [24.0; 32.5] |
| <b>Vietnam</b>                       | 2013 | 68.0 | [62.5; 73.4] | 73.6 | [69.4; 77.7] | 72.5 | [68.1; 77.0] | 71.3 | [66.7; 76.0] | 94.8  | [89.5; 100.0] | 81.5  | [75.8; 87.2] | 67.4 | [63.5; 71.4] |
| <b>Latin America &amp; Caribbean</b> |      |      |              |      |              |      |              |      |              |       |               |       |              |      |              |
| <b>Argentina</b>                     | 2011 | 58.4 | [55.5; 61.3] | NA   | -            | 54.0 | [50.2; 57.9] | 62.5 | [58.5; 66.4] | 79.9  | [60.0; 99.7]  | 60.6  | [54.8; 66.5] | 57.5 | [54.3; 60.7] |
| <b>Belize</b>                        | 2015 | 35.9 | [29.9; 41.9] | 52.3 | [46.0; 58.7] | 39.9 | [34.6; 45.2] | 52.1 | [45.7; 58.6] | 65.3  | [48.2; 82.3]  | 54.5  | [47.6; 61.4] | 36.6 | [29.5; 43.8] |
| <b>Costa Rica</b>                    | 2011 | 66.5 | [57.2; 75.7] | 84.2 | [78.9; 89.6] | 75.9 | [66.6; 85.2] | 72.7 | [64.4; 81.1] | 96.0  | [88.8; 100.0] | 86.0  | [80.7; 91.3] | 66.9 | [57.9; 75.8] |
| <b>Dominican Republic</b>            | 2014 | 76.8 | [74.8; 78.8] | 87.3 | [85.4; 89.2] | 78.6 | [76.5; 80.8] | 80.1 | [78.0; 82.2] | 95.0  | [91.3; 98.7]  | 86.3  | [83.5; 89.2] | 75.0 | [73.1; 76.9] |
| <b>El Salvador</b>                   | 2014 | 75.9 | [72.5; 79.3] | 89.0 | [86.8; 91.1] | 81.6 | [78.5; 84.7] | 81.6 | [79.0; 84.2] | 94.3  | [91.5; 97.1]  | 85.8  | [83.0; 88.7] | 77.2 | [74.0; 80.3] |
| <b>Guyana</b>                        | 2014 | 27.7 | [21.4; 34.0] | 35.4 | [31.6; 39.2] | 29.4 | [25.3; 33.4] | 37.0 | [32.1; 42.0] | 68.8  | [53.6; 84.0]  | 48.2  | [40.4; 56.0] | 29.6 | [26.0; 33.2] |
| <b>Jamaica</b>                       | 2011 | 26.7 | [18.9; 34.5] | 42.4 | [35.4; 49.4] | 29.5 | [22.6; 36.4] | 37.0 | [29.4; 44.6] |       |               | 59.0  | [37.8; 80.1] | 32.4 | [26.6; 38.2] |
| <b>Mexico</b>                        | 2015 | 77.1 | [72.5; 81.7] | 81.3 | [76.8; 85.7] | 78.6 | [72.9; 84.3] | 77.7 | [73.9; 81.4] | 90.3  | [84.1; 96.5]  | 82.7  | [78.0; 87.5] | 76.6 | [72.2; 81.1] |
| <b>Panama</b>                        | 2013 | 76.9 | [71.9; 81.9] | 87.9 | [83.8; 91.9] | 84.4 | [80.2; 88.6] | 78.5 | [73.9; 83.2] | 96.4  | [93.7; 99.0]  | 89.4  | [85.8; 92.9] | 76.9 | [72.2; 81.6] |
| <b>Paraguay</b>                      | 2016 | 70.7 | [66.6; 74.8] | 86.7 | [82.9; 90.6] | 76.3 | [72.1; 80.6] | 78.1 | [74.1; 82.0] | 95.8  | [90.5; 100.0] | 87.1  | [83.7; 90.5] | 83.6 | [77.5; 89.7] |
| <b>Suriname</b>                      | 2010 | 72.8 | [67.6; 78.0] | 88.6 | [85.9; 91.3] | 73.7 | [68.9; 78.6] | 85.4 | [81.5; 89.3] | 94.1  | [90.3; 97.8]  | 84.5  | [80.0; 89.0] | 71.3 | [66.4; 76.1] |
| <b>Trinidad and Tobago</b>           | 2011 | 18.4 | [12.4; 24.5] | 15.8 | [11.1; 20.4] | 15.9 | [10.7; 21.0] | 18.8 | [13.1; 24.4] | 11.8  | [0.0; 39.7]   | 17.1  | [9.3; 24.9]  | 17.2 | [12.4; 21.9] |
| <b>Uruguay</b>                       | 2012 | 49.9 | [40.4; 59.5] | 55.6 | [37.8; 73.4] | 56.7 | [45.3; 68.0] | 44.9 | [32.4; 57.3] | NA    | -             | 66.2  | [46.3; 86.1] | 44.2 | [35.9; 52.5] |

Note: Data not available marked as NA

Table S11. Prevalence of suspected developmental delay in each studied country for the combined indicator (ECDI) domain by urban/rural residence, sex of the child and maternal education; countries grouped by world region. Source: MICS and DHS surveys, 2010-2016.

| Country                               | Year | Area (%) |              |       |              | Sex (%) |              |      |              | Maternal education (%) |              |         |              |             |              |
|---------------------------------------|------|----------|--------------|-------|--------------|---------|--------------|------|--------------|------------------------|--------------|---------|--------------|-------------|--------------|
|                                       |      | Urban    | 95% IC       | Rural | 95% IC       | Female  | 95% IC       | Male | 95% IC       | None                   | 95% IC       | Primary | 95% IC       | Secondary + | 95% IC       |
| <b>West &amp; Central Africa</b>      |      |          |              |       |              |         |              |      |              |                        |              |         |              |             |              |
| Benin                                 | 2014 | 34.4     | [31.7; 37.1] | 40.3  | [37.5; 43.2] | 34.0    | [31.4; 36.6] | 41.7 | [39.1; 44.3] | 40.2                   | [37.8; 42.5] | 34.3    | [30.5; 38.1] | 32.7        | [27.2; 38.3] |
| Cameroon                              | 2014 | 30.0     | [26.9; 33.0] | 41.4  | [38.4; 44.5] | 34.3    | [30.9; 37.6] | 39.0 | [36.0; 42.0] | 39.0                   | [35.2; 42.8] | 39.9    | [36.4; 43.4] | 29.9        | [26.0; 33.8] |
| CAR                                   | 2010 | 50.6     | [45.9; 55.2] | 52.3  | [49.0; 55.7] | 48.6    | [45.3; 51.8] | 55.0 | [51.7; 58.3] | 53.2                   | [49.3; 57.1] | 51.4    | [47.7; 55.1] | 48.4        | [42.3; 54.5] |
| Chad                                  | 2014 | 58.0     | [53.4; 62.5] | 69.4  | [66.5; 72.4] | 65.3    | [62.0; 68.7] | 69.3 | [66.1; 72.5] | 68.8                   | [66.0; 71.5] | 67.0    | [61.6; 72.3] | 55.8        | [49.0; 62.7] |
| Congo Brazzaville                     | 2014 | 31.4     | [27.3; 35.5] | 52.3  | [49.4; 55.2] | 34.7    | [31.0; 38.4] | 43.1 | [39.3; 47.0] | 46.2                   | [38.5; 53.9] | 43.6    | [38.8; 48.4] | 38.6        | [34.6; 42.6] |
| Congo DR                              | 2013 | 28.2     | [23.7; 32.8] | 36.5  | [31.5; 41.5] | 31.2    | [26.7; 35.6] | 37.0 | [32.7; 41.2] | 36.1                   | [29.9; 42.3] | 38.5    | [33.5; 43.6] | 26.9        | [22.6; 31.2] |
| Côte D'Ivoire                         | 2016 | 33.4     | [28.3; 38.6] | 37.9  | [34.7; 41.2] | 34.3    | [30.8; 37.8] | 38.1 | [34.7; 41.4] | 38.3                   | [35.2; 41.4] | 34.9    | [29.5; 40.3] | 28.2        | [21.7; 34.7] |
| Gambia                                | 2010 | 29.8     | [25.9; 33.7] | 30.8  | [27.5; 34.1] | 27.8    | [24.7; 30.8] | 32.9 | [29.7; 36.1] | 31.5                   | [28.5; 34.5] | 33.1    | [27.4; 38.7] | 23.5        | [17.9; 29.0] |
| Ghana                                 | 2011 | 20.2     | [16.3; 24.1] | 28.4  | [24.9; 32.0] | 21.3    | [17.7; 24.9] | 28.4 | [24.9; 31.8] | 30.1                   | [26.1; 34.0] | 24.6    | [19.3; 29.8] | 20.6        | [16.6; 24.5] |
| Guinea                                | 2016 | 45.9     | [41.0; 50.8] | 52.8  | [49.5; 56.0] | 49.2    | [45.8; 52.6] | 51.8 | [48.6; 55.1] | 51.9                   | [49.0; 54.9] | 46.6    | [40.4; 52.8] | 46.1        | [39.9; 52.3] |
| Guinea Bissau                         | 2014 | 39.9     | [33.7; 46.2] | 36.4  | [33.0; 39.9] | 32.6    | [28.7; 36.5] | 42.9 | [39.0; 46.8] | 38.8                   | [35.3; 42.4] | 38.8    | [33.6; 44.0] | 31.7        | [24.7; 38.6] |
| Mali                                  | 2015 | 33.3     | [29.1; 37.4] | 38.0  | [35.7; 40.4] | 35.1    | [32.6; 37.5] | 39.0 | [36.6; 41.4] | 38.4                   | [36.1; 40.6] | 34.1    | [30.0; 38.1] | 35.9        | [29.4; 42.4] |
| Mauritania                            | 2015 | 34.6     | [31.1; 38.1] | 41.3  | [38.3; 44.3] | 36.6    | [33.8; 39.5] | 40.3 | [37.1; 43.5] | 41.1                   | [37.1; 45.2] | 41.9    | [38.3; 45.6] | 37.8        | [34.2; 41.5] |
| Nigeria                               | 2016 | 24.9     | [21.5; 28.3] | 43.6  | [41.6; 45.6] | 36.7    | [34.6; 38.9] | 39.0 | [36.9; 41.0] | 50.3                   | [47.2; 53.3] | 35.0    | [31.8; 38.3] | 22.9        | [20.8; 25.0] |
| S Tome and Principe                   | 2014 | 46.1     | [40.2; 52.0] | 42.7  | [36.8; 48.6] | 44.1    | [38.7; 49.5] | 45.8 | [39.8; 51.8] | 50.3                   | [33.7; 66.9] | 47.1    | [42.3; 51.9] | 39.6        | [31.7; 47.5] |
| Sierra Leone                          | 2010 | 50.3     | [44.8; 55.7] | 55.4  | [52.2; 58.6] | 53.8    | [50.4; 57.3] | 54.2 | [50.8; 57.5] | 56.0                   | [53.1; 59.0] | 52.2    | [46.2; 58.1] | 42.5        | [36.0; 49.1] |
| Togo                                  | 2013 | 40.8     | [36.3; 45.3] | 47.5  | [43.6; 51.5] | 43.0    | [39.4; 46.7] | 47.4 | [43.4; 51.3] | 48.5                   | [44.1; 52.8] | 44.1    | [39.8; 48.5] | 40.1        | [34.7; 45.4] |
| <b>Eastern &amp; Southern Africa</b>  |      |          |              |       |              |         |              |      |              |                        |              |         |              |             |              |
| Burundi                               | 2016 | 44.7     | [39.3; 50.0] | 60.6  | [58.4; 62.8] | 53.3    | [50.5; 56.1] | 65.1 | [62.7; 67.5] | 63.1                   | [60.5; 65.7] | 58.3    | [55.5; 61.1] | 41.9        | [36.5; 47.3] |
| Eswatini                              | 2014 | 25.5     | [18.5; 32.5] | 35.7  | [31.8; 39.6] | 31.9    | [27.3; 36.6] | 35.3 | [30.6; 40.0] | 39.7                   | [30.6; 48.8] | 36.2    | [30.7; 41.7] | 31.0        | [26.6; 35.5] |
| Malawi                                | 2013 | 28.9     | [24.2; 33.5] | 40.4  | [38.6; 42.2] | 35.0    | [32.6; 37.4] | 43.2 | [41.0; 45.4] | 47.4                   | [43.2; 51.6] | 39.4    | [37.5; 41.3] | 28.9        | [25.1; 32.6] |
| Rwanda                                | 2014 | 22.4     | [15.6; 29.3] | 29.5  | [26.9; 32.0] | 26.1    | [23.1; 29.2] | 30.5 | [27.5; 33.6] | 36.3                   | [31.1; 41.5] | 28.3    | [25.6; 31.0] | 15.8        | [11.4; 20.2] |
| Uganda                                | 2016 | 22.5     | [18.5; 26.6] | 37.9  | [35.7; 40.1] | 33.7    | [31.2; 36.2] | 35.9 | [33.3; 38.4] | 40.1                   | [35.3; 44.9] | 38.6    | [36.2; 41.0] | 22.7        | [19.5; 25.8] |
| Zimbabwe                              | 2014 | 34.4     | [31.3; 37.6] | 37.6  | [35.4; 39.8] | 34.4    | [32.0; 36.8] | 39.4 | [36.9; 41.9] | 34.7                   | [26.9; 42.4] | 37.5    | [34.6; 40.3] | 36.6        | [34.3; 38.9] |
| <b>Middle East &amp; North Africa</b> |      |          |              |       |              |         |              |      |              |                        |              |         |              |             |              |
| Algeria                               | 2012 | 28.7     | [26.5; 31.0] | 30.1  | [27.1; 33.0] | 25.8    | [23.5; 28.2] | 32.4 | [30.2; 34.7] | 33.7                   | [30.3; 37.2] | 29.7    | [26.1; 33.4] | 27.7        | [25.4; 29.9] |
| Iraq                                  | 2011 | 26.6     | [24.7; 28.4] | 29.8  | [27.7; 31.9] | 23.7    | [22.0; 25.5] | 31.5 | [29.6; 33.4] | 31.7                   | [29.0; 34.4] | 28.7    | [26.8; 30.6] | 23.7        | [21.4; 26.0] |
| Jordan                                | 2012 | 30.3     | [26.5; 34.2] | 30.8  | [27.4; 34.2] | 26.8    | [23.0; 30.5] | 33.9 | [29.6; 38.2] | 30.0                   | [18.8; 41.2] | 37.0    | [27.1; 46.8] | 29.9        | [26.5; 33.3] |
| State of Palestine                    | 2014 | 27.0     | [25.2; 28.8] | 23.6  | [19.6; 27.5] | 21.8    | [19.7; 24.0] | 30.8 | [28.6; 33.1] | 16.7                   | [0.7; 32.7]  | 31.0    | [27.8; 34.1] | 24.2        | [22.4; 26.1] |
| Tunisia                               | 2011 | 19.6     | [16.0; 23.2] | 26.4  | [21.3; 31.5] | 17.8    | [14.2; 21.4] | 26.1 | [21.8; 30.4] | 30.1                   | [22.4; 37.8] | 23.1    | [18.2; 28.1] | 18.9        | [15.1; 22.8] |
| <b>Europe &amp; Central Asia</b>      |      |          |              |       |              |         |              |      |              |                        |              |         |              |             |              |
| Belarus                               | 2012 | 4.4      | [3.1; 5.7]   | 8.1   | [4.2; 12.1]  | 3.7     | [2.3; 5.1]   | 7.2  | [4.5; 9.9]   | NA                     | -            | 14.7    | [0.0; 29.9]  | 5.1         | [3.6; 6.6]   |
| Bosnia and Herzegovina                | 2011 | 2.1      | [0.6; 3.6]   | 3.9   | [1.4; 6.5]   | 2.3     | [1.1; 3.5]   | 4.4  | [1.1; 7.6]   | 0.0                    | -            | 3.4     | [1.3; 5.5]   | 3.3         | [1.1; 5.5]   |
| Kazakhstan                            | 2015 | 12.6     | [10.2; 15.0] | 13.5  | [9.5; 17.6]  | 12.5    | [8.6; 16.5]  | 13.6 | [11.2; 16.1] | 0.0                    | -            | 25.0    | -            | 13.3        | [10.6; 15.9] |
| Kosovo                                | 2013 | 16.7     | [11.8; 21.7] | 15.3  | [11.9; 18.7] | 11.7    | [8.1; 15.3]  | 19.6 | [15.1; 24.1] | 4.8                    | [0.0; 14.6]  | 31.5    | [17.1; 45.9] | 15.0        | [12.1; 17.9] |
| Kyrgyzstan                            | 2014 | 20.0     | [15.4; 24.6] | 19.6  | [16.6; 22.6] | 17.6    | [14.3; 20.9] | 21.7 | [18.4; 25.0] | 100.0                  | -            | 18.8    | [0.0; 48.2]  | 19.3        | [16.6; 21.9] |
| Macedonia                             | 2011 | 7.6      | [4.4; 10.7]  | 6.3   | [2.6; 10.0]  | 6.8     | [3.7; 9.9]   | 7.1  | [3.2; 10.9]  | 8.6                    | [0.0; 24.0]  | 8.3     | [3.4; 13.3]  | 6.0         | [3.4; 8.6]   |
| Moldova                               | 2012 | 12.3     | [8.8; 15.7]  | 16.7  | [12.3; 21.2] | 14.6    | [10.3; 18.8] | 15.4 | [11.0; 19.8] | NA                     | -            | 0.0     | -            | 14.4        | [11.2; 17.5] |

|                                      |      |      |              |      |              |      |              |      |              |      |              |      |              |      |              |
|--------------------------------------|------|------|--------------|------|--------------|------|--------------|------|--------------|------|--------------|------|--------------|------|--------------|
| <b>Montenegro</b>                    | 2013 | 4.5  | [1.8; 7.1]   | 4.3  | [1.6; 7.1]   | 3.6  | [1.1; 6.2]   | 5.0  | [2.0; 8.1]   | 0.0  | -            | 7.8  | [1.1; 14.4]  | 3.9  | [1.9; 5.9]   |
| <b>Turkmenistan</b>                  | 2015 | 7.1  | [4.7; 9.5]   | 8.0  | [5.9; 10.0]  | 7.6  | [5.3; 9.8]   | 7.8  | [5.7; 9.9]   | NA   | -            | 0.0  | -            | 7.7  | [6.0; 9.4]   |
| <b>Ukraine</b>                       | 2012 | 9.0  | [6.6; 11.4]  | 10.1 | [7.0; 13.2]  | 8.9  | [6.4; 11.5]  | 9.7  | [7.1; 12.3]  | NA   | -            | NA   | -            | 9.3  | [7.3; 11.2]  |
| <b>South Asia</b>                    |      |      |              |      |              |      |              |      |              |      |              |      |              |      |              |
| <b>Bangladesh</b>                    | 2012 | 28.3 | [24.7; 32.0] | 37.1 | [35.6; 38.6] | 33.2 | [31.3; 35.2] | 37.4 | [35.5; 39.2] | 42.8 | [40.2; 45.4] | 39.8 | [37.4; 42.3] | 27.7 | [25.8; 29.6] |
| <b>Bhutan</b>                        | 2010 | 22.1 | [17.8; 26.5] | 29.5 | [26.3; 32.7] | 24.0 | [20.9; 27.1] | 30.5 | [27.1; 33.9] | 28.9 | [25.8; 32.0] | 31.5 | [25.0; 37.9] | 18.5 | [14.2; 22.8] |
| <b>Nepal</b>                         | 2014 | 15.9 | [11.5; 20.3] | 38.0 | [34.1; 42.0] | 32.8 | [27.9; 37.8] | 37.3 | [33.2; 41.4] | 43.9 | [38.9; 48.9] | 34.5 | [28.3; 40.8] | 23.0 | [18.6; 27.4] |
| <b>East Asia &amp; the Pacific</b>   |      |      |              |      |              |      |              |      |              |      |              |      |              |      |              |
| <b>Cambodia</b>                      | 2014 | 18.0 | [14.1; 22.0] | 28.0 | [25.4; 30.5] | 27.0 | [24.0; 30.0] | 26.3 | [23.3; 29.3] | 32.0 | [26.6; 37.5] | 27.4 | [24.4; 30.4] | 22.3 | [18.6; 26.0] |
| <b>Lao</b>                           | 2011 | 11.9 | [9.0; 14.7]  | 20.1 | [18.1; 22.0] | 16.9 | [15.0; 18.9] | 19.9 | [17.8; 22.0] | 25.7 | [22.7; 28.7] | 16.4 | [14.5; 18.4] | 11.0 | [8.7; 13.2]  |
| <b>Mongolia</b>                      | 2013 | 23.0 | [20.4; 25.5] | 23.4 | [20.7; 26.2] | 20.1 | [17.7; 22.5] | 26.2 | [23.3; 29.1] | 18.0 | [12.3; 23.7] | 23.3 | [17.1; 29.6] | 23.5 | [21.4; 25.6] |
| <b>Thailand</b>                      | 2015 | 6.3  | [4.1; 8.6]   | 7.0  | [5.2; 8.7]   | 5.9  | [4.2; 7.7]   | 7.5  | [5.5; 9.4]   | 15.5 | [5.4; 25.6]  | 7.5  | [5.0; 10.1]  | 7.0  | [4.8; 9.1]   |
| <b>Vietnam</b>                       | 2013 | 8.0  | [5.4; 10.6]  | 10.8 | [8.0; 13.6]  | 9.1  | [6.5; 11.7]  | 10.9 | [7.8; 13.9]  | 23.0 | [13.0; 33.1] | 15.6 | [10.0; 21.2] | 7.5  | [5.4; 9.5]   |
| <b>Latin America &amp; Caribbean</b> |      |      |              |      |              |      |              |      |              |      |              |      |              |      |              |
| <b>Argentina</b>                     | 2011 | 13.2 | [11.4; 15.0] | NA   | -            | 11.3 | [8.9; 13.7]  | 14.9 | [12.2; 17.6] | 31.6 | [5.6; 57.7]  | 18.0 | [13.1; 22.9] | 11.4 | [9.5; 13.2]  |
| <b>Belize</b>                        | 2015 | 12.1 | [8.4; 15.7]  | 17.7 | [13.9; 21.6] | 13.0 | [9.9; 16.1]  | 18.1 | [13.9; 22.4] | 23.2 | [8.9; 37.5]  | 17.2 | [12.9; 21.6] | 14.6 | [10.0; 19.2] |
| <b>Costa Rica</b>                    | 2011 | 16.8 | [10.3; 23.3] | 19.9 | [14.1; 25.7] | 16.8 | [10.7; 23.0] | 19.5 | [13.0; 26.0] | 42.7 | [11.8; 73.6] | 24.8 | [17.7; 31.9] | 13.7 | [8.8; 18.5]  |
| <b>Dominican Republic</b>            | 2014 | 13.7 | [12.2; 15.2] | 17.0 | [14.8; 19.3] | 13.1 | [11.4; 14.9] | 15.9 | [14.0; 17.7] | 25.3 | [18.8; 31.9] | 16.8 | [14.6; 19.0] | 12.7 | [11.2; 14.3] |
| <b>El Salvador</b>                   | 2014 | 17.2 | [14.9; 19.6] | 19.4 | [16.9; 21.8] | 16.3 | [14.0; 18.5] | 20.1 | [17.5; 22.6] | 24.1 | [17.0; 31.2] | 21.7 | [18.7; 24.6] | 15.2 | [13.1; 17.3] |
| <b>Guyana</b>                        | 2014 | 10.2 | [6.2; 14.1]  | 11.8 | [9.1; 14.5]  | 10.5 | [8.1; 12.8]  | 12.2 | [8.7; 15.7]  | 11.5 | [3.9; 19.0]  | 20.3 | [14.1; 26.5] | 9.7  | [7.4; 11.9]  |
| <b>Jamaica</b>                       | 2011 | 8.9  | [5.9; 12.0]  | 11.4 | [6.7; 16.0]  | 6.1  | [3.2; 8.9]   | 13.4 | [9.3; 17.5]  | NA   | -            | 7.1  | [0.0; 17.1]  | 10.1 | [7.4; 12.9]  |
| <b>Mexico</b>                        | 2015 | 17.1 | [14.0; 20.3] | 17.7 | [14.7; 20.8] | 14.2 | [10.5; 17.8] | 21.1 | [18.3; 23.8] | 21.7 | [10.1; 33.3] | 18.5 | [14.7; 22.3] | 16.8 | [13.8; 19.9] |
| <b>Panama</b>                        | 2013 | 17.9 | [12.8; 22.9] | 20.6 | [16.4; 24.8] | 18.3 | [14.4; 22.2] | 19.4 | [14.6; 24.3] | 29.3 | [21.6; 37.0] | 21.9 | [17.0; 26.7] | 17.0 | [12.6; 21.4] |
| <b>Paraguay</b>                      | 2016 | 17.7 | [14.3; 21.0] | 16.6 | [13.3; 19.8] | 15.8 | [12.5; 19.0] | 18.6 | [15.1; 22.1] | 23.0 | [10.1; 35.9] | 22.8 | [18.4; 27.3] | 21.8 | [15.2; 28.3] |
| <b>Suriname</b>                      | 2010 | 22.1 | [17.6; 26.6] | 38.6 | [34.9; 42.4] | 24.0 | [20.1; 27.9] | 34.2 | [29.6; 38.8] | 43.1 | [36.3; 49.8] | 31.9 | [27.1; 36.7] | 22.4 | [18.0; 26.7] |
| <b>Trinidad and Tobago</b>           | 2011 | 6.9  | [3.1; 10.7]  | 5.0  | [2.2; 7.8]   | 4.9  | [1.7; 8.0]   | 7.3  | [3.4; 11.2]  | 11.2 | [0.0; 38.6]  | 8.7  | [2.9; 14.6]  | 5.5  | [2.5; 8.4]   |
| <b>Uruguay</b>                       | 2012 | 13.0 | [6.1; 19.9]  | 4.0  | [0.0; 9.4]   | 14.6 | [5.3; 23.9]  | 11.2 | [4.9; 17.5]  | NA   | -            | 21.2 | [2.1; 40.3]  | 9.5  | [4.8; 14.2]  |

Note: Data not available marked as NA
